# Supplementary material for: Coupling coordination and spatial-temporal characteristics of resource and environmental carrying capacity and high-quality development
Source: Frontiers journal article supplement (doi:10.3389/fenvs.2022.971508), 2022-11-18
Supplement: Table_1.XLSX [file Table_1.XLSX]

## Sheet: 2005
			Beijing	Tianjin	Hebei	Shanxi	Inner Mongolia	Liaoning	Jilin	Heilongjiang	Shanghai	Jiangsu	Zhejiang	Anhui	Fujian	Jiangxi	Shandong	Henan	Hubei	Hunan	Guangdong	Guangxi	Hainan	Chongqing	Sichuan	Guizhou	Yunnan	Shaanxi	Gansu	Qinghai	Ningxia	Xinjiang
Resources carrying capacity	n1	Per capita cultivated land area	0.223602	0.46558	1.00471	1.36769	3.43713	0.989055	2.0539	3.08194	0.177222	0.677151	0.433912	0.975768	0.405856	0.694363	0.831455	0.864638	0.866813	0.624881	0.355906	0.945901	0.920411	0.738969	1.11655	1.31461	1.44306	1.38185	1.93705	1.26703	2.12886	1.98294
	n2	Water resources per capita	151.207	102.212	196.999	251.51	1917.3	896.3	2066.8	1954.2	138.015	626.6	2077.2	1178.8	3975.5	3513.2	451.041	597.22	1640.6	2649.5	1906.4	3703.8	3722.4	1827.4	3569.6	2244.4	4161.7	1322.7	1042.4	16176.9	143.603	4808.9
	n3	Proportion of nature reserve in the area under jurisdiction	8	14.4	3	7.3	12	11.2	12.4	10.4	14.8	7.9	2.6	3.1	3.3	5.4	6.6	4.5	5.5	5	4.6	6.2	5.3	10.8	18.4	5	10.7	4.8	20.3	29	9.8	13.6
	n4	Forest coverage rate	21.26	8.14	17.69	13.29	17.7	32.97	38.13	39.54	3.17	7.54	54.41	24.03	62.96	55.86	13.44	16.19	26.77	40.63	46.49	41.41	48.87	22.25	30.27	23.83	40.77	32.55	6.66	4.4	6.08	2.94
	n5	Electricity consumption per capita	3709.62	3689.74	2192.26	2820.66	2798.49	2631.04	1392.6	1455.1	5185.43	2934.38	3353.02	951.242	2140.28	909.255	2067.05	1442.15	1381.63	1066.12	2907.94	1094.74	985.628	1242.6	1147.82	1305.55	1252.25	1388.25	1886.97	3804.05	5081.88	1542.99
Environmental carrying capacity	n6	Urban sewage treatment rate	70.11	57.96	53.76	56.23	51.11	47.33	27.61	35.88	70.84	76.77	59.46	52.34	54.52	34.92	59.85	45.85	47.62	40.55	45.03	46.41	64.99	34.65	42.69	26.82	61.76	31.94	41.03	18.49	53.93	69.68
	n7	Per capita sulfur dioxide emissions	0.0123537	0.0254075	0.0218216	0.0451863	0.0610226	0.0283582	0.0141016	0.0132984	0.0288526	0.0183679	0.0175582	0.00933007	0.013041	0.0142194	0.0216479	0.0173134	0.0125744	0.0145273	0.0140744	0.0219742	0.002657	0.0299142	0.0158305	0.0364075	0.0117303	0.0247849	0.0217039	0.0228361	0.0573826	0.0258209
	n8	Harmless treatment rate of domestic waste	95.9525	80.5249	45.7786	13.1225	42.6748	50.0391	40.1792	32.2677	35.7304	82.9025	82.4013	17.5976	85.9241	48.8654	58.2475	57.8776	61.0495	39.6914	50.5956	61.3776	69.0271	54.7811	51.2336	57.847	82.2363	39.7761	17.2263	100	50.3527	35.9051
	n9	Green coverage rate of built-up area	35.7	36.4	35	30.2	23.3	36.5	31.4	26.4	27.8	39.8	33.8	27.5	36.1	32.6	37	32.3	34.7	33.1	33.5	29.8	32.6	22.2	29.3	27.4	24.6	30.2	26.4	24	22.9	31.8
Economy	n10	GDP index	111.831	114.702	113.429	112.6	123.831	112.317	112.1	111.607	111.1	114.48	112.785	111.599	111.638	112.833	115.245	114.221	112.1	111.6	113.8	113.181	110.244	111.5	112.611	111.6	109	112.6	111.847	112.17	110.94	110.9
	n11	GDP per capita	4.54437	3.57832	1.47823	1.2495	1.63308	1.89832	1.3348	1.44341	5.1474	2.456	2.77027	0.867514	1.86458	0.944	2.00965	1.13465	1.1431	1.0426	2.4435	0.878773	1.0871	1.0982	0.906	0.505196	0.7835	0.9899	0.747653	1.00447	1.0239	1.3108
	n12	Public budget revenue per capita	0.597666	0.318169	0.0752739	0.109789	0.116285	0.15998	0.076271	0.0832999	0.797187	0.176947	0.217762	0.0545779	0.122376	0.0586694	0.116039	0.0573189	0.0657656	0.0624826	0.196563	0.0607373	0.0829471	0.0917824	0.0584101	0.0489266	0.0702582	0.0740103	0.0476109	0.0622877	0.0800698	0.0897106
Coordination	n13	Urbanization rate	83.62	75.11	37.69	42.11	47.2	58.7	52.52	53.1	89.09	50.11	56.02	35.5	47.3	37	45	30.65	43.2	37	60.68	33.62	45.2	45.2	33	26.87	29.5	37.23	30.02	39.25	42.28	37.15
	n14	The proportion of output value of secondary and tertiary industries in GDP	98.6	97	85.1	93.7	84.9	89	82.7	87.6	99.1	92	93.4	82	87.2	82.1	89.4	82.1	83.4	80.4	93.6	77.6	66.4	84.9	79.9	81.4	80.7	88.1	84.1	88	88.1	80.4
Green	n15	Parkland area per capita	7.38927	5.14728	1.50591	1.61508	2.08922	3.64529	2.72183	2.73104	6.7357	3.43639	2.68326	1.21401	1.65828	1.30678	2.97147	1.34794	2.38462	1.12918	4.34419	1.15059	2.0539	1.52021	1.36358	0.777823	0.966047	1.08241	1.35489	1.03494	2.32317	1.65271
	n16	Consumption of chemical fertilizers	14.84	23.29	303.39	95.7	116.72	119.86	138.1	150.92	14.44	340.81	94.27	285.67	122.02	129.39	467.63	518.137	285.83	209.867	204.62	201.25	37.3101	79.05	220.925	77.4095	142.65	147.3	75.92	6.99	29.93	107.77
Innovation	n17	The proportion of science, technology and education in GDP	0.0234692	0.0189317	0.01724	0.0249268	0.0206821	0.0183305	0.02123	0.0199453	0.0217236	0.0145414	0.0180174	0.0223251	0.0176879	0.0222174	0.0138466	0.0180982	0.0186226	0.0192916	0.0154344	0.0268253	0.0276657	0.0201093	0.0196914	0.048718	0.0364888	0.0276735	0.0359232	0.0382725	0.0334452	0.0288047
	n18	Number of students in higher education per 10,000 persons	356.482	317.884	112.977	121.322	96.7737	156.207	149.949	141.588	248.943	155.157	132.974	96.2541	115.133	149.869	126.653	90.8171	177.349	119.326	95.1366	72.5882	84.5217	119.215	94.4272	55.43	57.233	179.286	88.4576	60.3186	81.6275	90.4547
	n19	Number of patent applications granted	10100	3045	3585	1220	845	6195	2023	2906	12603	13580	19056	1939	5147	1361	10743	3748	3860	3659	36894	1225	200	3591	4606	925	1381	1894	547	79	214	921
Openness	n20	Openness to the outside world	0.636249	1.21031	0.15682	0.178223	0.111538	0.481101	0.166574	0.155602	1.62421	1.06717	0.754748	0.141179	0.708306	0.10014	0.394238	0.0701439	0.125547	0.087557	1.6085	0.115825	0.19412	0.112873	0.0851277	0.0844173	0.117828	0.137046	0.126516	0.0739127	0.159636	0.261183
	n21	FDI (Foreign Direct Investment)	352638	332885	191256	27516	140007	359042	115102	152203	685000	1318339	772271	68845	260775	242258	1101441	122960	218475	233305	1517358	37866	70711	70423	110206	19568	29247	62839	2044	26600	14107	4749
Sharing	n22	Public library collections per 10,000 persons	7.29129	8.33174	1.90775	2.17258	3.11819	5.51054	4.42563	3.37958	34.0214	4.25284	4.74479	1.38464	3.60396	2.97379	2.96929	1.52345	3.36778	2.63516	3.39243	3.19957	2.22742	2.74482	2.4379	2.04826	3.0809	2.38441	3.31534	5.96685	6.34228	4.06468
	n23	Number of doctors per 10,000 persons	32.9272	23.9655	15.4112	19.8775	21.0847	21.6818	20.7699	17.051	24.7222	14.5418	17.9767	10.801	12.5358	11.5289	15.2063	11.848	15.6755	14.5547	12.837	11.7088	14.2645	13.3385	13.8452	10.9727	12.5476	16.214	13.5875	15.6133	17.7617	20.61
	n24	Public finance expenditure per capita	0.688109	0.423893	0.142923	0.19933	0.285783	0.285327	0.232372	0.206227	0.925903	0.223866	0.258378	0.116514	0.16777	0.130817	0.158545	0.118981	0.136378	0.138068	0.248974	0.131219	0.18266	0.17418	0.13178	0.139605	0.172205	0.688109	0.423893	0.142923	0.19933	0.285783

## Sheet: 2006
			Beijing	Tianjin	Hebei	Shanxi	Inner Mongolia	Liaoning	Jilin	Heilongjiang	Shanghai	Jiangsu	Zhejiang	Anhui	Fujian	Jiangxi	Shandong	Henan	Hubei	Hunan	Guangdong	Guangxi	Hainan	Chongqing	Sichuan	Guizhou	Yunnan	Shaanxi	Gansu	Qinghai	Ningxia	Xinjiang
Resources carrying capacity	n1	Per capita cultivated land area	0.217521	0.451721	0.997869	1.35959	3.42136	0.977476	2.04862	3.07952	0.173609	0.670424	0.426767	0.977365	0.403232	0.689882	0.826007	0.863533	0.869401	0.623305	0.351698	0.934075	0.911603	0.730769	3.26535	0.600257	1.70924	1.37631	1.92813	1.25547	2.10066	1.94424
	n2	Water resources per capita	141.5	95.5	156.1	263.1	1719.8	615.5	1300.3	1904.8	153.9	538.3	1829.5	949.3	4577.7	3768.7	214.8	342.8	1122	2794.9	2396.1	4011.3	2735.4	1356.8	2278.1	2176.1	3832.2	739.1	709.9	10430.8	176.8	4695.1
	n3	Proportion of nature reserve in the area under jurisdiction	7.86	14.5	3.19	7.22	11.4	10.91	12.34	11.93	14.79	6.75	2.59	3.34	3.06	5.53	6.63	4.52	5.45	5.22	4.64	5.89	5.28	11.14	18.57	5.4	10.73	5.08	21.68	30.2	9.78	13.55
	n4	Forest coverage rate	21.26	8.14	17.69	13.29	17.7	32.97	38.13	39.54	3.17	7.54	54.41	24.03	62.96	55.86	13.44	16.19	26.77	40.63	46.49	41.41	48.87	22.25	30.27	23.83	40.77	32.55	6.66	4.4	6.08	2.94
	n5	Electricity consumption per capita	3868.26	4033.95	2514.98	3252.38	3691.73	2875.85	1514.72	1561.72	5455.34	3403.65	3833.8	1083.77	2436.32	1028.34	2440.73	1622.13	1540.06	1212.19	3228.75	1227.93	1168.37	1443.01	1296.9	1549.05	1440.14	1554.83	2058.08	4460.13	6255.79	1737.56
Environmental carrying capacity	n6	Urban sewage treatment rate	55.67	73.78	59.48	63.63	60.22	52.08	48.75	30.36	32.77	74.92	81.82	61.53	57.49	58.82	34.93	69.18	54.08	54.52	42.72	45.15	46.82	65.74	50.36	49.38	29.54	51.57	46.97	20.37	55.92	74.62
	n7	Per capita sulfur dioxide emissions	0.0111322	0.0237209	0.0223978	0.0437926	0.0649562	0.0294779	0.0150202	0.0135496	0.027989	0.0172715	0.017249	0.0095581	0.0131816	0.0146117	0.0210764	0.0172913	0.0133497	0.0147272	0.0136178	0.0210638	0.00287081	0.0306268	0.0156812	0.0389939	0.0122909	0.0262651	0.0209517	0.0237226	0.0634106	0.0267805
	n8	Harmless treatment rate of domestic waste	92.48	85	46.54	23.08	48.28	54.08	17.81	23.34	57.91	83.77	86.32	31.41	58.09	50.69	70.11	46.28	34.83	46.31	55.78	57.48	62.54	58.9	57.04	68.02	34.28	60.18	18.28	94.59	55.41	26.96
	n9	Green coverage rate of built-up area	44.35	37	35.57	31.88	26.58	36.93	31.64	28.67	37.33	41.72	35.53	32.58	36.58	34.56	37.45	32.79	37.11	34.74	37.96	32.88	38.86	23.45	33.54	29.41	25.83	36.22	28.59	26.72	28.98	29.97
Economy	n10	GDP index	112.8	114.5	113.4	111.8	118.7	113.8	115	112.1	112	114.9	113.9	112.8	114.8	112.3	114.8	114.4	113.2	112.2	114.6	113.6	112.5	112.2	113.3	111.6	111.9	112.8	111.5	112.2	112.7	111
	n11	GDP per capita	5.0467	4.1163	1.6962	1.4123	2.0053	2.1788	1.572	1.6195	5.7695	2.8814	3.1874	1.0055	2.1471	1.0798	2.3794	1.3313	1.3296	1.195	2.8332	1.0296	1.2654	1.2457	1.0546	0.5787	0.897	1.2138	0.8757	1.1762	1.1847	1.5
	n12	Public budget revenue per capita	0.706611	0.387952	0.0899585	0.172852	0.143253	0.191447	0.0900494	0.101189	0.86836	0.219428	0.260684	0.0700534	0.1521	0.0704129	0.145693	0.0723138	0.0836259	0.0753591	0.23425	0.0725956	0.0978635	0.113147	0.0743769	0.0603715	0.084758	0.0970497	0.0541885	0.077087	0.101584	0.107055
Coordination	n13	Urbanization rate	84.33	75.73	38.44	43.01	48.64	58.99	52.97	53.5	88.7	51.9	56.5	37.1	48	38.68	46.1	32.47	43.8	38.71	63	34.64	46.1	46.7	34.3	27.46	30.5	39.12	31.09	39.26	43	37.94
	n14	The proportion of output value of secondary and tertiary industries in GDP	98.7	97.3	86.2	94.2	86.4	89.4	84.3	88.1	99.1	92.9	94.1	83.3	88.2	83.2	90.3	83.6	85	82.4	94	78.6	67.3	87.8	81.5	82.8	81.3	89.2	85.3	89.1	88.8	82.7
Green	n15	Parkland area per capita	10.68	6.59	7.87	6.63	9.39	7.93	7.34	7.29	7.33	9.6	6.99	7.28	7.51	7.74	12.77	7.93	8.34	6.99	9.25	7.58	10.85	6.45	7.74	5.49	6.47	5.89	6.95	7.81	8.66	6.96
	n16	Consumption of chemical fertilizers	14.84	24.56	304.89	98.27	128.51	121.08	146.7	162.2	14.53	342.01	93.98	294.29	120.86	132.58	489.82	540.43	292.48	214.72	212.13	210.66	39.49	80.54	228.16	80.23	150.39	149.73	76.5	7.17	31.92	119.65
Innovation	n17	The proportion of science, technology and education in GDP	0.0247131	0.0194738	0.0165971	0.0259577	0.0202795	0.0186232	0.0221101	0.0222256	0.021775	0.0142678	0.0179036	0.0252783	0.0185797	0.0227844	0.0136492	0.0191021	0.0195732	0.0191989	0.0156382	0.0290969	0.0270841	0.0229103	0.0217486	0.0504467	0.038725	0.0289226	0.0394521	0.0388949	0.0358598	0.0303395
	n18	Number of students in higher education per 10,000 persons	357.861	332.448	125.053	132.275	105.514	168.707	159.774	154.852	256.933	173.004	144.552	108.623	129.663	177.581	143.745	103.716	191.863	130.902	108.403	82.1036	107.821	133.945	105.354	58.9689	63.4017	194.436	101.186	65.6624	92.601	97.1956
	n19	Number of patent applications granted	11238	4159	4131	1421	978	7399	2319	3622	16602	19352	30968	2235	6412	1536	15937	5242	4734	5608	43516	1442	248	4590	7138	1337	1637	2473	832	97	290	1187
Openness	n20	Openness to the outside world	0.713693	1.23044	0.160504	0.162061	0.101702	0.451737	0.162255	0.181264	1.70129	1.10136	0.810601	0.158824	0.679327	0.123779	0.399488	0.0700606	0.127371	0.0840321	1.64833	0.125635	0.256858	0.12125	0.0984988	0.077293	0.126881	0.121987	0.155454	0.116384	0.180878	0.267298
	n21	FDI (Foreign Direct Investment)	455191	413077	201434	47199	196863	598554	165028	174901	710700	1743140	888935	139354	322047	280657	1020966	184526	244853	259335	1780780	44740	79259	87667	147428	18413	30200	92489	2954	27500	13794	10366
Sharing	n22	Public library collections per 10,000 persons	7.62808	8.7907	1.95854	2.9437	3.1748	5.60524	4.5134	3.75621	33.3994	4.51656	5.01406	1.48445	3.82799	3.01682	3.05726	1.56516	3.47971	2.68685	3.71238	3.31426	1.88541	2.82051	2.56335	2.05217	3.11622	2.44444	3.34612	5.27372	6.4404	3.9561
	n23	Number of doctors per 10,000 persons	33.3934	23.5033	15.3792	20.1911	21.03	22.0841	21.6893	16.9749	25.0749	15.1775	18.9807	11.3619	12.9429	11.8543	15.7257	12.2957	15.8351	13.8526	14.0317	12.007	14.5873	13.3586	14.0402	10.9521	12.5978	16.2158	13.8212	15.6478	18.197	20.8659
	n24	Public finance expenditure per capita	0.820265	0.50523	0.171116	0.27128	0.338812	0.333118	0.263812	0.253342	0.989293	0.266656	0.295554	0.153884	0.204805	0.160506	0.196953	0.153331	0.183911	0.167852	0.274435	0.154591	0.208776	0.211629	0.16494	0.162534	0.199327	0.220664	0.202838	0.39172	0.319882	0.330962

## Sheet: 2007
			Beijing	Tianjin	Hebei	Shanxi	Inner Mongolia	Liaoning	Jilin	Heilongjiang	Shanghai	Jiangsu	Zhejiang	Anhui	Fujian	Jiangxi	Shandong	Henan	Hubei	Hunan	Guangdong	Guangxi	Hainan	Chongqing	Sichuan	Guizhou	Yunnan	Shaanxi	Gansu	Qinghai	Ningxia	Xinjiang
Resources carrying capacity	n1	Per capita cultivated land area	0.142185	0.397916	0.909569	1.19465	2.97143	0.950481	2.02748	3.09581	0.139739	0.624757	0.37896	0.936279	0.372264	0.647149	0.801437	0.846798	0.818276	0.596219	0.301371	0.883955	0.860946	0.795129	0.732142	1.19284	1.34523	1.08032	1.78057	0.98225	1.81367	1.96383
	n2	Water resources per capita	148.157	103.288	173.094	305.556	1232.25	610.848	1269.17	1286.38	187.857	653.323	1777.19	1165.29	3005.74	2556.47	414.557	496.141	1782.05	2247.07	1686.29	2922.44	3373.31	2357.61	2822.58	2805.22	5013.94	1007.71	875.862	12029.5	171.104	4167.79
	n3	Proportion of nature reserve in the area under jurisdiction	7.96	14.36	3.02	7.29	11.47	10.41	12.5	13.06	14.79	5.96	2.57	4.09	3.09	5.92	6.63	4.61	5.34	5.24	4.68	5.78	5.28	10.91	18.56	5.44	10.73	5.08	21.67	30.28	9.78	13.39
	n4	Forest coverage rate	21.26	8.14	17.69	13.29	17.7	32.97	38.13	39.54	3.17	7.54	54.41	24.03	62.96	55.86	13.44	16.19	26.77	40.63	46.49	41.41	48.87	22.25	30.27	23.83	40.77	32.55	6.66	4.4	6.08	2.94
	n5	Electricity consumption per capita	4084.56	4438.66	2900.29	3975.28	4824.17	3163.13	1694.65	1644.71	5771.69	3871.5	4326.81	1257.12	2793.45	1170.07	2771.49	1931.62	1735.8	1401.39	3591.97	1428.56	1340.28	1595.23	1448.89	1778.57	1651.57	1744.09	2349.02	5170.96	7209.44	1972.9
Environmental carrying capacity	n6	Urban sewage treatment rate	76.16	61.44	66.12	63.32	56.95	51.7	38.63	52.66	72.98	84.37	70.08	73.57	66.72	39.32	80.31	68.28	63.25	46.34	55.97	49.39	66.51	74.38	55.18	39.13	65.42	51.23	54.4	32.07	60.08	66.5
	n7	Per capita sulfur dioxide emissions	0.00930802	0.0219731	0.0214893	0.0408783	0.0605405	0.028711	0.0146154	0.0134676	0.026803	0.0159738	0.015751	0.00934946	0.0124546	0.014217	0.0194513	0.0167094	0.0124232	0.014225	0.0127315	0.0204279	0.00307692	0.0293324	0.0145072	0.0365497	0.0118299	0.0247332	0.0199847	0.0242754	0.0606557	0.027685
	n8	Harmless treatment rate of domestic waste	95.73	93.31	53.37	38.15	53.98	56.52	38.17	22.97	79.16	86.91	87.35	49.07	81.62	70.51	80.71	54.9	41.88	52.77	63.03	68.38	62.07	82.33	69.92	71.15	80.43	52.43	26.32	94.88	52.41	28.16
	n9	Green coverage rate of built-up area	36.1702	37.5	36.5034	32.5792	28.0733	37.5205	31.2549	28.7666	37.5975	42.8005	36.1491	36.0915	37.0013	39.0523	38.6037	34.3405	37.568	35.5787	38.4927	32.1112	40.4806	31.8061	34.1981	30.5331	30.9545	37.6527	24.1444	27.474	33.5283	32.0273
Economy	n10	GDP index	113.3	115.2	112.8	114.4	119.1	114.5	116.1	112	114.3	114.9	114.7	113.9	115.2	113	114.3	114.6	114.5	114.5	114.7	115.1	114.8	115.6	114.2	113.7	112.5	114.6	112.3	112.5	112.7	112.2
	n11	GDP per capita	5.8204	4.6122	1.9877	1.6945	2.5393	2.5729	1.9383	1.8478	6.6367	3.3928	3.7411	1.2045	2.5908	1.2633	2.7807	1.6012	1.6206	1.4492	3.3151	1.2555	1.4555	1.466	1.2893	0.6915	1.054	1.4607	1.0346	1.4257	1.4649	1.6999
	n12	Public budget revenue per capita	0.914047	0.484699	0.113657	0.176212	0.204724	0.251907	0.117469	0.115185	1.11651	0.293472	0.325988	0.0888685	0.195325	0.0892516	0.178862	0.0921026	0.103589	0.0954447	0.294825	0.0878411	0.128158	0.157209	0.104696	0.0757941	0.107823	0.126798	0.0729502	0.102732	0.131199	0.136449
Coordination	n13	Urbanization rate	84.5	76.31	40.25	44.03	50.15	59.2	53.16	53.9	88.7	53.2	57.2	38.7	48.7	39.8	46.75	34.34	44.3	40.45	63.14	36.24	47.2	48.34	35.6	28.24	31.6	40.62	31.59	40.07	44.02	39.15
	n14	The proportion of output value of secondary and tertiary industries in GDP	98.9	97.8	86.8	95.3	87.5	89.7	85.1	87	99.2	93	94.7	83.7	89.2	83.6	90.3	85.3	85.1	82.4	94.6	79.1	70.5	88.3	80.7	83.7	82.4	89.1	85.7	89.3	89	82.2
Green	n15	Parkland area per capita	8.57	6.6	8.4	7.13	10.63	9.03	8.27	8.24	7.48	12.59	8.79	8.72	8.64	8.73	13.33	8.92	9.29	7.63	9.22	8.56	10.12	7.61	8.37	5.89	7.44	8	6.83	8.47	10.42	8.09
	n16	Consumption of chemical fertilizers	13.9871	25.82	311.87	100.83	140.29	127.47	154.39	175.2	14.08	342.03	92.82	305.02	119.69	132.65	500.34	569.68	299.9	219.58	219.636	220.838	41.67	84.32	238.168	82.0528	158.27	158.81	80.14	7.55	34.63	131.52
Innovation	n17	The proportion of science, technology and education in GDP	0.0378204	0.0262085	0.0219409	0.034363	0.0267258	0.0263819	0.0294252	0.0307469	0.0319226	0.0218181	0.0242504	0.0310858	0.0221558	0.0331885	0.019247	0.0260685	0.0255629	0.0270667	0.0223637	0.0340132	0.0352472	0.0321644	0.0298551	0.0642811	0.042941	0.0361911	0.0485784	0.0476975	0.0585836	0.0441674
	n18	Number of students in higher education per 10,000 persons	354.076	332.857	134.022	142.791	118.111	180.958	172.23	166.031	260.965	193.091	153.751	119.409	142.274	178.957	153.772	117.008	204.191	141.404	118.495	91.0963	128.161	146.895	113.011	64.2456	68.9214	207.181	113.104	68.2337	102.313	103.288
	n19	Number of patent applications granted	14954	5584	5358	1992	1313	9615	2855	4303	24481	31770	42069	3413	7761	2069	22821	6998	6616	5687	56451	1907	296	4994	9935	1727	2139	3451	1025	222	296	1534
Openness	n20	Openness to the outside world	0.666942	1.1377	0.191199	0.202096	0.113486	0.449612	0.162696	0.198349	1.70854	1.09963	0.806536	0.162503	0.618982	0.142569	0.41233	0.071959	0.126124	0.0842704	1.59596	0.133635	0.439621	0.132079	0.0985513	0.0887788	0.141055	0.114578	0.165284	0.0659135	0.167765	0.333313
	n21	FDI (Foreign Direct Investment)	506572	527776	241621	134283	238780	909673	227062	216908	792000	2189206	1036576	299892	406058	310358	1101159	306162	276622	327051	1961771	68396	112499	122011	201169	15333	55233	119516	11802	31000	16968	12484
Sharing	n22	Public library collections per 10,000 persons	8.01653	9.23767	2.07864	3.04126	3.33472	5.70265	4.68498	3.84676	33.6598	4.57836	5.33399	1.64106	3.86484	3.03114	3.29348	1.61218	3.57431	2.7144	3.91364	3.40394	2.0742	3.05043	2.6049	1.85008	3.14577	2.49733	3.39702	6.15942	6.68852	3.99045
	n23	Number of doctors per 10,000 persons	33.8549	23.3587	15.5875	19.0572	20.126	21.0868	20.8645	17.5167	26.2944	15.5822	19.3708	11.2998	11.2019	11.8654	15.7107	12.3825	16.1856	14.5597	14.6357	12.198	14.8959	13.7493	14.4155	10.0673	12.5357	15.8252	13.4291	15.7844	18.3361	20.7881
	n24	Public finance expenditure per capita	1.01011	0.604777	0.217002	0.309438	0.450023	0.410489	0.323722	0.310479	1.17421	0.334914	0.357074	0.203307	0.254299	0.207202	0.24147	0.199852	0.224132	0.213538	0.334381	0.206783	0.290174	0.272865	0.216455	0.21143	0.251488	0.281208	0.258058	0.511231	0.396483	0.379548

## Sheet: 2008
			Beijing	Tianjin	Hebei	Shanxi	Inner Mongolia	Liaoning	Jilin	Heilongjiang	Shanghai	Jiangsu	Zhejiang	Anhui	Fujian	Jiangxi	Shandong	Henan	Hubei	Hunan	Guangdong	Guangxi	Hainan	Chongqing	Sichuan	Guizhou	Yunnan	Shaanxi	Gansu	Qinghai	Ningxia	Xinjiang
Resources carrying capacity	n1	Per capita cultivated land area	0.136689	0.375076	0.903915	1.18918	2.96108	0.946829	2.02438	3.09253	0.129184	0.620504	0.375167	0.934016	0.369063	0.64252	0.798038	0.840638	0.816691	0.593946	0.296598	0.875731	0.851884	0.787577	0.730818	1.1826	1.33657	1.07665	1.77266	0.979107	1.79226	1.93569
	n2	Water resources per capita	205.529	159.756	231.123	256.908	1710.31	617.671	1215.23	1208	197.544	494.053	1680.16	1141.43	2886.29	3093.52	349.979	395.231	1812.27	2512.76	2323.8	4763.15	4933.49	2040.32	3061.67	3019.72	5110.96	809.587	714.967	11900.5	149.837	3859.91
	n3	Proportion of nature reserve in the area under jurisdiction	7.96	13.6	3.02	7.29	11.69	10.36	12.4	13.59	14.79	5.51	2.52	4.05	3.05	6.61	6.63	4.51	5.34	5.29	4.79	5.9	5.28	10.96	17.9	5.42	7.21	5.08	16.54	30.28	9.78	13.43
	n4	Forest coverage rate	21.26	8.14	17.69	13.29	17.7	32.97	38.13	39.54	3.17	7.54	54.41	24.03	62.96	55.86	13.44	16.19	26.77	40.63	46.49	41.41	48.87	22.25	30.27	23.83	40.77	32.55	6.66	4.4	6.08	2.94
	n5	Electricity consumption per capita	4069.14	4386.77	2997.67	3853.66	5056.8	3272.53	1815.98	1751.2	6027.22	4061.74	4536.86	1399.96	2978.77	1240.64	2895.72	2090.11	1853.49	1418.42	3672.28	1564.34	1425.31	1706.26	1487.02	1790.73	1825.76	1882.05	2578.88	5650.83	7117.09	2249.72
Environmental carrying capacity	n6	Urban sewage treatment rate	78.92	72.4	77.59	71.4	67.62	59.01	51.46	52.97	79.82	84.13	75.1	78.86	72.72	51.52	84.98	77.59	66.76	52.05	66.23	64.47	63.73	84.2	65.36	40.21	73.59	56.71	59.97	39.89	72.06	72.78
	n7	Per capita sulfur dioxide emissions	0.00725664	0.0204082	0.019245	0.0383509	0.0592858	0.0262127	0.0138259	0.0132274	0.0236171	0.0147187	0.0144727	0.00906275	0.0119034	0.01325	0.0179671	0.0153993	0.0117317	0.0131661	0.0119028	0.0192068	0.00257611	0.0275449	0.0141067	0.0325887	0.01105	0.023631	0.0191011	0.024355	0.0563389	0.0274545
	n8	Harmless treatment rate of domestic waste	97.71	93.52	57.15	47.47	54.99	59.78	32.61	26.42	74.38	90.84	89.57	53.95	87.97	79.71	79.37	67.29	52.98	59.52	63.87	82.3	64.74	88.38	80.63	76.8	79.96	68.52	32.28	75.22	56.45	52
	n9	Green coverage rate of built-up area	37.15	33.9	38.71	35.16	30.55	38.06	31.5	31.39	38	42.55	37.74	35.97	38.86	41.8	39.8	35.38	37.63	35.83	40.31	32.67	42.13	35.91	35.3	29.83	32.04	38.72	25.88	28.17	37.81	31.86
Economy	n10	GDP index	109	116.5	110.1	108.3	117.2	113.1	116	111.8	109.7	112.3	110.1	112.7	113	112.6	112.1	112.1	113.4	112.8	110.1	112.8	109.8	114.3	109.5	110.2	111	115.6	110.1	112.7	112.2	111
	n11	GDP per capita	6.3029	5.5473	2.3239	2.0398	3.2214	3.1259	2.3514	2.1727	7.3124	3.9622	4.2214	1.4485	3.0123	1.4781	3.3083	1.9593	1.986	1.7521	3.7589	1.4966	1.7175	1.8025	1.5378	0.8824	1.2587	1.8246	1.211	1.7389	1.7892	1.9893
	n12	Public budget revenue per capita	1.08397	0.574506	0.135586	0.219317	0.269573	0.314293	0.154644	0.151168	1.24903	0.355777	0.377615	0.118112	0.231244	0.111056	0.207816	0.107	0.12447	0.113278	0.346849	0.107646	0.169623	0.203443	0.128	0.0917127	0.135164	0.157224	0.100819	0.129116	0.153813	0.169449
Coordination	n13	Urbanization rate	84.9	77.23	41.9	45.11	51.71	60.05	53.21	55.4	88.6	54.3	57.6	40.5	49.9	41.36	47.6	36.03	45.2	42.15	63.37	38.16	48	49.99	37.4	29.11	33	42.1	32.15	40.86	44.98	39.64
	n14	The proportion of output value of secondary and tertiary industries in GDP	98.9	98	87.4	95.7	88.3	90.3	85.7	86.9	99.2	93.1	94.9	84	89.3	83.6	90.4	85.5	84.3	82	94.5	79.8	70	88.7	81.1	83.6	82.1	89	85.4	89.1	89.1	83.5
Green	n15	Parkland area per capita	8.56	7.595	9.49	7.64	11.1	9.37	9.2	9.46	7.82	13.11	9.6	9.29	10.42	10.6	14.2	8.2	9.4	7.96	11.46	8.61	9	9.62	8.74	6.16	7.62	8.71	7.87	8.53	11	7.91
	n16	Consumption of chemical fertilizers	13.63	25.88	312.4	103.404	154.098	128.773	163.844	180.73	14.32	340.76	92.98	307.35	118.674	132.97	476.33	601.68	327.66	223.38	226.597	222.581	45.62	88.14	242.84	83.0904	167.671	165.9	81.37	8.11	34.75	148.89
Innovation	n17	The proportion of science, technology and education in GDP	0.0408546	0.0268085	0.0246253	0.0364079	0.0285713	0.0263998	0.0313581	0.0332982	0.0325838	0.0225688	0.025168	0.0349367	0.0239229	0.03364	0.0195715	0.0257753	0.0271176	0.0302824	0.0234153	0.0372911	0.0412075	0.033085	0.0315919	0.0728248	0.0455466	0.0411673	0.0605772	0.0548863	0.0531464	0.0509227
	n18	Number of students in higher education per 10,000 persons	345.501	328.603	143.09	154.446	131.208	190.135	184.376	177.273	266.301	204.842	162.544	131.748	156.103	173.678	162.894	132.591	207.479	149.268	127.451	100.538	147.957	158.509	121.783	70.5365	76.5424	223.195	126.286	76.0906	114.06	108.396
	n19	Number of patent applications granted	17747	6790	5496	2279	1328	10665	2984	4574	24468	44438	52953	4346	7937	2295	26688	9133	8374	6133	62031	2228	341	4820	13369	1728	2021	4392	1047	228	606	1493
Openness	n20	Openness to the outside world	0.629357	0.949818	0.218302	0.202115	0.0933569	0.4239	0.147274	0.170659	1.59142	0.986268	0.789985	0.153007	0.556472	0.160835	0.419413	0.075038	0.130927	0.0846564	1.39651	0.143949	0.456451	0.1233	0.110662	0.100146	0.113665	0.10599	0.143501	0.0578063	0.163202	0.412658
	n21	FDI (Foreign Direct Investment)	608172	741978	341868	102282	285556	1201925	300809	265642	1008400	2512001	1007294	348988	567171	360368	820246	403266	324481	400515	2126657	97119	128468	285688	334159	17379	77700	136954	12842	22000	12073	18984
Sharing	n22	Public library collections per 10,000 persons	8.27788	9.41071	2.07546	3.22963	3.44322	5.98976	4.92099	3.93581	33.8588	4.91814	6.20898	1.74963	4.04523	3.17818	3.33506	1.73147	3.6871	2.76803	4.18567	3.51993	3.01171	3.2839	2.83227	1.92843	3.19767	2.66401	3.53409	6.27638	8.47351	4.19702
	n23	Number of doctors per 10,000 persons	34.8395	22.0153	15.7348	21.1865	20.5251	21.0244	21.0399	17.4547	27.031	15.5603	19.901	12.0336	11.9348	12.5425	16.9699	12.6542	16.1157	15.0948	15.1369	12.6298	15.0468	13.8834	14.9731	10.238	12.6075	15.4875	13.765	16.9836	18.5271	20.3942
	n24	Public finance expenditure per capita	1.15592	0.737861	0.26924	0.385567	0.602625	0.499093	0.431647	0.403175	1.37356	0.422999	0.431362	0.26848	0.315681	0.275017	0.287203	0.241978	0.288965	0.276681	0.39591	0.269333	0.41917	0.357876	0.362353	0.277845	0.323627	0.379724	0.368489	0.655953	0.525517	0.497167

## Sheet: 2009
			Beijing	Tianjin	Hebei	Shanxi	Inner Mongolia	Liaoning	Jilin	Heilongjiang	Shanghai	Jiangsu	Zhejiang	Anhui	Fujian	Jiangxi	Shandong	Henan	Hubei	Hunan	Guangdong	Guangxi	Hainan	Chongqing	Sichuan	Guizhou	Yunnan	Shaanxi	Gansu	Qinghai	Ningxia	Xinjiang
Resources carrying capacity	n1	Per capita cultivated land area	0.129459	0.364122	0.932759	1.18704	3.79399	1.16738	2.56626	4.14686	0.0988027	0.597139	0.383533	0.963464	0.369948	0.696974	0.809721	0.863497	0.930594	0.645489	0.262731	0.912376	0.844607	0.852886	0.821014	1.20129	1.36598	1.05981	2.05285	1.05509	2.0603	2.37331
	n2	Water resources per capita	126.609	126.789	201.323	250.833	1563.88	396.016	1088.93	2586.87	218.276	519.82	1808.45	1195.34	2214.94	2642.46	301.746	347.614	1443.94	2190.63	1682.49	3069.3	5596.16	1600.27	2857.51	2397.65	3459.73	1105.63	794.318	16113.6	135.511	3516.6
	n3	Proportion of nature reserve in the area under jurisdiction	7.96	13.6	3.02	7.29	11.69	10.36	12.4	13.59	14.79	5.51	2.52	4.05	3.05	6.61	6.63	4.51	5.34	5.29	4.79	5.9	5.28	10.96	17.9	5.42	7.21	5.08	16.54	30.28	9.78	13.43
	n4	Forest coverage rate	31.72	8.24	22.29	14.12	20	35.13	38.93	42.39	9.41	10.48	57.41	26.06	63.1	58.32	16.72	20.16	31.14	44.76	49.44	52.71	51.98	34.85	34.31	31.61	47.5	37.26	10.42	4.57	9.84	4.02
	n5	Electricity consumption per capita	4211.66	4479.51	3331.98	3698.29	5317.46	3445.64	1880.8	1799.97	6004.06	4289.95	4771.12	1553.26	3129.08	1374.55	3105.57	2193.92	1984.49	1577.54	3745.22	1763.49	1548.11	1867.08	1618.34	1975.52	1949.66	1962.13	2677	6051.26	7404.97	2538.08
Environmental carrying capacity	n6	Urban sewage treatment rate	80.3	80.1	84.5	75.2	75.2	60.2	64.6	55.6	89	85.4	78.9	83.2	80.3	74.9	88.1	83.9	75.3	59.2	71.5	73.4	58.4	88.4	67.5	56.2	85.3	66.4	61.3	46.4	42.2	75.4
	n7	Per capita sulfur dioxide emissions	0.00678063	0.0192972	0.0178125	0.0369964	0.0577605	0.0243343	0.0132504	0.0128071	0.0197293	0.0139029	0.0135328	0.00877508	0.0115798	0.0127252	0.0167893	0.0142827	0.0112587	0.0126756	0.0111019	0.0183278	0.00254609	0.026093	0.0138668	0.0309373	0.0109166	0.021315	0.018972	0.0244034	0.0502239	0.0273322
	n8	Harmless treatment rate of domestic waste	98.22	94.31	59	62.89	72.01	59.87	38.39	29.86	78.77	90.98	97.6	60.91	92.53	84.4	90.54	75.33	55.65	66.6	65.49	86.32	64.98	95.88	83.5	81.7	80.88	69.16	32.37	65.11	41.96	60.63
	n9	Green coverage rate of built-up area	47.69	30.33	40.02	36.49	32.44	38.33	32.78	33.62	38.1	41.99	38.2	37.16	39.71	44.36	41.18	36.29	37.79	36.59	40.75	33.69	41.88	38.48	36.4	27.44	36.29	38.76	27.32	29.02	38.75	36.3
Economy	n10	GDP index	110.2	116.5	110	105.4	116.9	113.1	113.6	111.4	108.2	112.4	108.9	112.9	112.3	113.1	112.2	110.9	113.5	113.7	109.7	113.9	111.7	114.9	114.5	111.4	112.1	113.6	110.3	110.1	111.9	108.1
	n11	GDP per capita	7.0452	6.2574	2.4581	2.1522	4.0282	3.5239	2.6595	2.2447	7.8989	4.4744	4.4641	1.64077	3.384	1.7335	3.5894	2.0597	2.2677	2.0428	4.1166	1.6045	1.9254	2.292	1.7339	1.0309	1.3539	2.1688	1.2872	1.9454	2.1777	1.9942
	n12	Public budget revenue per capita	1.15488	0.669287	0.151701	0.235116	0.351294	0.368423	0.177801	0.167711	1.32238	0.417965	0.413613	0.14091	0.25708	0.131155	0.232161	0.118695	0.142459	0.132316	0.37869	0.127881	0.206282	0.229161	0.143506	0.109657	0.152757	0.194929	0.108744	0.157434	0.178464	0.180107
Coordination	n13	Urbanization rate	85	78.01	43	45.99	53.4	60.35	53.32	55.5	88.6	55.6	57.9	42.1	51.4	43.18	48.32	37.7	46	43.2	63.4	39.2	49.13	51.59	38.7	29.89	34	43.5	32.65	41.9	46.1	39.85
	n14	The proportion of output value of secondary and tertiary industries in GDP	99	98.3	87.2	93.5	90.5	90.7	86.6	86.6	99.3	93.5	94.9	85.1	90.4	85.6	90.5	85.8	86.2	84.9	94.9	81.2	72.1	90.7	84.1	85.9	82.7	90.4	85.3	90.1	90.6	82.2
Green	n15	Parkland area per capita	12.11	8.59	11.19	8.21	11.65	9.76	9.82	10.47	8.02	13.21	10.76	10.23	10.51	11.48	15.09	8.72	9.58	8.47	12.27	9.6	9.96	11.25	9.49	6.13	8.89	9.34	7.99	8.13	14.96	8.46
	n16	Consumption of chemical fertilizers	13.82	25.96	316.17	104.32	171.424	133.61	174.18	198.872	12.56	344.002	93.5959	312.79	120.68	135.76	472.86	628.67	340.255	231.604	233.155	229.32	46.29	91.1657	247.974	86.5388	171.387	181.319	82.9	7.96	35.54	154.98
Innovation	n17	The proportion of science, technology and education in GDP	0.0404817	0.0275998	0.0270235	0.0401821	0.026852	0.0265713	0.0324189	0.0333722	0.0373685	0.0231488	0.0269084	0.0358012	0.0249616	0.0346603	0.0199537	0.0288315	0.0264346	0.0296481	0.024611	0.0405549	0.0487061	0.0315216	0.033925	0.0692601	0.0530286	0.0406132	0.0639223	0.0615908	0.0501764	0.0599215
	n18	Number of students in higher education per 10,000 persons	334.293	330.55	150.752	159.712	145.301	197.376	193.818	185.294	266.949	214.036	167.277	143.171	167.159	179.03	168.207	144.283	218.367	158.731	138.42	108.802	164.433	169.36	126.565	78.7446	86.1083	236.943	137.164	78.5609	120.864	111.94
	n19	Number of patent applications granted	22921	7404	6839	3227	1494	12198	3275	5079	34913	87286	79945	8594	11282	2915	34513	11425	11357	8309	83621	2702	630	7501	20132	2084	2923	6087	1274	368	910	1866
Openness	n20	Openness to the outside world	0.489501	0.654188	0.159593	0.0865455	0.0663706	0.313642	0.111521	0.106286	1.2409	0.725443	0.626077	0.106273	0.453517	0.123419	0.329537	0.0528382	0.0931432	0.0607136	1.09342	0.119378	0.35031	0.0807279	0.103859	0.0476125	0.0825668	0.0725174	0.0904317	0.045303	0.0990006	0.257543
	n21	FDI (Foreign Direct Investment)	612094	901985	359824	49315	318019	1544390	356661	250900	1053800	2532298	993974	388416	573747	402354	801007	479858	365766	459787	2028688	103533	94304	419178	412933	18027	91010	151053	13383	21500	14208	21570
Sharing	n22	Public library collections per 10,000 persons	9.05285	9.43459	2.20233	3.43243	3.59363	6.44794	4.88551	4.10772	34.3229	5.26984	6.85651	1.85324	4.25242	3.32471	3.71194	1.8177	3.81338	2.87138	4.53141	3.62378	3.94349	3.4557	3.03038	2.10727	3.29886	2.80689	3.60842	7.21918	6.95785	4.3257
	n23	Number of doctors per 10,000 persons	35.8137	22.4645	17.6457	24.7144	28.5694	22.1528	21.9569	19.3879	27.6023	16.2097	21.9792	13.8278	15.1822	13.3851	18.6048	15.9155	17.11	16.5142	16.7463	13.7589	16.3378	15.6093	16.9438	10.9176	13.2376	18.4902	14.2844	18.3402	19.3346	21.6573
	n24	Public finance expenditure per capita	1.32158	0.915416	0.33373	0.455658	0.795533	0.621067	0.539946	0.490784	1.5563	0.520047	0.512229	0.349359	0.389254	0.352509	0.345044	0.306289	0.365546	0.345058	0.449717	0.333983	0.562527	0.451939	0.438695	0.361313	0.427114	0.488239	0.47289	0.8734	0.691559	0.623966

## Sheet: 2010
			Beijing	Tianjin	Hebei	Shanxi	Inner Mongolia	Liaoning	Jilin	Heilongjiang	Shanghai	Jiangsu	Zhejiang	Anhui	Fujian	Jiangxi	Shandong	Henan	Hubei	Hunan	Guangdong	Guangxi	Hainan	Chongqing	Sichuan	Guizhou	Yunnan	Shaanxi	Gansu	Qinghai	Ningxia	Xinjiang
Resources carrying capacity	n1	Per capita cultivated land area	0.114073	0.341494	0.910726	1.13712	3.7164	1.15001	2.55494	4.1368	0.0817315	0.583975	0.364215	0.989624	0.362388	0.691355	0.798728	0.869441	0.927441	0.629747	0.246088	0.959805	0.840365	0.846871	0.835322	1.31253	1.35607	1.06866	2.10802	1.04423	2.03283	2.34382
	n2	Water resources per capita	124.19	72.8006	195.277	261.515	1576.08	1392.1	2503.32	2228.59	163.131	489.213	2608.75	1526.87	4491.74	5116.68	324.4	566.247	2216.51	2938.66	1943.31	3852.88	5538.66	1616.75	3173.51	2726.76	4233.15	1360.25	841.656	13225	148.185	5125.24
	n3	Proportion of nature reserve in the area under jurisdiction	7.97	8.06	3.05	7.4	11.69	12.46	12.29	14.09	5.22	4.08	1.5	3.6	3.23	6.69	4.92	4.4	5.16	5.88	6.95	5.97	7.01	9.92	18.42	5.39	7.8	5.64	16.17	30.21	9.79	12.95
	n4	Forest coverage rate	31.72	8.24	22.29	14.12	20	35.13	38.93	42.39	9.41	10.48	57.41	26.06	63.1	58.32	16.72	20.16	31.14	44.76	49.44	52.71	51.98	34.85	34.31	31.61	47.5	37.26	10.42	4.57	9.84	4.02
	n5	Electricity consumption per capita	4128.14	4969.95	3741.55	4084.93	6216.5	3920.68	2100.7	1950.85	5627.71	4910.67	5179.34	1809.57	3561.03	1569.86	3440.24	2502.76	2322.73	1783.7	3888.65	2154.53	1830.87	2171.66	1925.48	2401.25	2182	2300.32	3142.33	8262.52	8638.3	3029.41
Environmental carrying capacity	n6	Urban sewage treatment rate	82.1	85.3	92.3	84.9	80.6	74.9	73.9	56.7	83.3	87.6	82.7	88.5	84.4	80.8	91.1	87.6	81	75	86.1	83.4	54.9	91.7	74.8	86.8	93.4	74.2	62.6	43.5	78	73.3
	n7	Per capita sulfur dioxide emissions	0.00586421	0.0180983	0.0171511	0.0349513	0.0563916	0.0233653	0.0129728	0.0127867	0.0155516	0.0133491	0.0124546	0.00893238	0.0110764	0.0124841	0.0160392	0.0142332	0.0110438	0.0121963	0.0100614	0.0196058	0.00331702	0.0249393	0.014058	0.0330224	0.010881	0.0208461	0.0215543	0.0254762	0.049095	0.0269317
	n8	Harmless treatment rate of domestic waste	96.95	100	69.82	73.58	82.8	70.88	44.51	40.36	81.86	93.58	98.3	64.56	91.96	85.89	91.9	82.59	61.43	78.99	72.12	91.14	67.97	98.82	86.86	90.64	88.28	79.84	37.95	67.28	92.53	70.58
	n9	Green coverage rate of built-up area	55.1	32.06	42.73	38.01	33.35	39.32	34.12	34.89	38.15	42.07	38.3	37.5	40.97	46.62	41.47	36.56	37.74	36.64	41.31	34.96	42.63	40.57	37.88	29.58	37.31	38.29	27.12	29.38	38.75	36.42
Economy	n10	GDP index	110.3	117.4	112.2	113.9	115	114.2	113.8	112.7	110.3	112.7	111.9	114.6	113.9	114	112.3	112.5	114.8	114.6	112.4	114.2	116	117.1	115.1	112.8	112.3	114.6	111.8	115.3	113.5	110.6
	n11	GDP per capita	7.5943	7.2994	2.8668	2.6283	4.7347	4.2355	3.1599	2.7076	7.60745	5.284	5.1711	2.0888	4.0025	2.1253	4.1106	2.4446	2.7906	2.4719	4.4736	2.0219	2.3831	2.7596	2.1182	1.3119	1.5752	2.7133	1.6113	2.4115	2.686	2.5034
	n12	Public budget revenue per capita	1.19982	0.82261	0.185144	0.271302	0.432808	0.458259	0.219329	0.197104	1.24794	0.51845	0.478924	0.192958	0.311804	0.174372	0.286757	0.146863	0.176544	0.164638	0.432627	0.16746	0.312004	0.330052	0.194119	0.153418	0.189323	0.256532	0.13812	0.195764	0.242591	0.229085
Coordination	n13	Urbanization rate	0.859371	0.795819	0.444979	0.480399	0.554976	0.621043	0.533386	0.556686	0.89288	0.605769	0.616174	0.430103	0.57108	0.440585	0.496982	0.384989	0.49704	0.433022	0.661816	0.4	0.498531	0.530052	0.401744	0.338034	0.347053	0.457536	0.361331	0.447602	0.478703	0.430184
	n14	The proportion of output value of secondary and tertiary industries in GDP	99.1	98.5	87.4	94	90.7	91.2	87.9	87.4	99.4	93.9	95.1	86	90.7	87.2	90.8	85.9	86.5	85.5	95	82.5	73.9	91.4	85.6	86.4	84.6	90.2	85.5	90	90.6	80.2
Green	n15	Parkland area per capita	11.28	8.56	14.23	9.36	12.36	10.21	10.27	11.27	6.97	13.29	11.05	10.95	10.99	13.04	15.84	8.65	9.62	8.89	13.29	9.83	11.22	13.24	10.19	7.33	9.3	10.67	8.12	8.53	16.18	8.61
	n16	Consumption of chemical fertilizers	13.67	25.54	322.861	110.366	177.24	140.076	182.8	214.885	11.84	341.11	92.2	319.773	121.037	137.62	475.32	655.15	350.77	236.57	237.287	237.16	46.43	91.8186	248.003	86.5347	184.581	196.79	85.26	8.76	37.9281	167.56
Innovation	n17	The proportion of science, technology and education in GDP	0.0445763	0.0295755	0.0266715	0.037899	0.0294296	0.0256966	0.0310728	0.0315217	0.0360777	0.0245191	0.0262584	0.0359476	0.0244331	0.0334092	0.0218232	0.0283229	0.0248412	0.0273185	0.024687	0.0405954	0.0512481	0.0325979	0.0334796	0.0670798	0.0548468	0.0398121	0.0580285	0.0640884	0.0518175	0.0614298
	n18	Number of students in higher education per 10,000 persons	299.254	330.353	153.625	157.5	150.227	201.204	198.206	187.592	223.941	209.602	162.465	157.63	175.406	182.976	170.15	154.881	226.421	159.395	136.637	123.105	173.629	181.209	135.019	92.9286	95.4107	248.384	149.035	79.9183	126.716	114.942
	n19	Number of patent applications granted	33511	11006	10061	4752	2096	17093	4343	6780	48215	138382	114643	16012	18063	4349	51490	16539	17362	13873	119343	3647	714	12080	32212	3086	3823	10034	1868	264	1081	2562
Openness	n20	Openness to the outside world	0.53094	0.672306	0.205972	0.101973	0.0677532	0.349498	0.132953	0.119733	1.44115	0.81508	0.701435	0.128058	0.50781	0.150078	0.389131	0.0586746	0.110351	0.0658817	1.227	0.138284	0.34005	0.101038	0.103584	0.0508704	0.0968224	0.0782616	0.12137	0.0410087	0.102858	0.265967
	n21	FDI (Foreign Direct Investment)	636358	1084872	383074	71421	355876	2075010	416461	275851	1112100	2849777	1100175	501446	580279	510084	916833	624670	405015	518441	2102646	91200	152276	636956	701299	34026	132900	182006	13521	21930	23175	23742
Sharing	n22	Public library collections per 10,000 persons	8.74381	9.68474	2.23937	3.37944	3.80247	6.75045	5.02508	4.28849	29.569	5.55316	6.90572	2.07463	4.55365	3.40663	3.79213	1.95334	4.12204	2.98527	4.42057	4.07999	3.28149	3.57333	3.23076	2.33421	3.40316	3.01762	4.06964	6.35462	7.30421	5.09533
	n23	Number of doctors per 10,000 persons	52.4396	29.1967	18.3602	25.3358	22.9272	22.7821	22.7806	20.8916	37.5333	17.2693	25.3667	12.6754	16.6105	13.1856	19.417	14.3339	16.1885	15.6236	20.4817	13.2827	16.1324	14.5209	16.1304	10.3579	13.9803	17.0475	14.5019	19.2083	19.0895	22.6645
	n24	Public finance expenditure per capita	1.38504	1.05969	0.392049	0.540376	0.919636	0.730489	0.650713	0.587799	1.43438	0.624456	0.58898	0.434403	0.459001	0.431008	0.432321	0.363208	0.436704	0.411329	0.519257	0.435486	0.669319	0.592465	0.529276	0.468959	0.496724	0.594028	0.573669	1.32043	0.880827	0.777495

## Sheet: 2011
			Beijing	Tianjin	Hebei	Shanxi	Inner Mongolia	Liaoning	Jilin	Heilongjiang	Shanghai	Jiangsu	Zhejiang	Anhui	Fujian	Jiangxi	Shandong	Henan	Hubei	Hunan	Guangdong	Guangxi	Hainan	Chongqing	Sichuan	Guizhou	Yunnan	Shaanxi	Gansu	Qinghai	Ningxia	Xinjiang
Resources carrying capacity	n1	Per capita cultivated land area	0.109977	0.325535	0.906704	1.13123	3.70285	1.14378	2.55371	4.13383	0.0799162	0.580822	0.362731	0.986344	0.359651	0.687389	0.793494	0.869397	0.920799	0.627388	0.247629	0.951884	0.828185	0.839226	0.83672	1.31481	1.3461	1.06608	2.10125	1.03543	2.00954	2.32507
	n2	Water resources per capita	134.707	115.963	217.748	346.964	1691.59	673.198	1149.52	1641.97	89.116	624.551	1365.71	1010.09	2090.52	2319.11	361.646	349.025	1319.13	1711.93	1404.82	2917.39	5545.59	1773.3	2782.85	1802.11	3206.53	1616.56	945.367	12956.8	137.691	4031.34
	n3	Proportion of nature reserve in the area under jurisdiction	7.97	8.06	3.05	7.42	11.67	12.83	12.29	14.52	5.22	4.08	1.53	3.76	2.96	7.14	4.8	4.4	5.16	5.9	6.73	5.98	6.97	10.3219	18.5827	5.40721	7.77035	5.7	16.17	30.21	10.34	12.95
	n4	Forest coverage rate	31.72	8.24	22.29	14.12	20	35.13	38.93	42.39	9.41	10.48	57.41	26.06	63.1	58.32	16.72	20.16	31.14	44.76	49.44	52.71	51.98	34.85	34.31	31.61	47.5	37.26	10.42	4.57	9.84	4.02
	n5	Electricity consumption per capita	4070.67	5130.26	4122.51	4593.4	7511.23	4247.17	2291.96	2091.48	5706.7	5420.6	5705.5	2046.23	4074.89	1860.55	3772.19	2832.49	2519.78	1961.06	4187.61	2394.42	2111.85	2456.43	2175.7	2721.84	2600.14	2625.1	3601.32	9868.23	11330.7	3799.07
Environmental carrying capacity	n6	Urban sewage treatment rate	81.7	86.8	93.9	86.5	83.9	84.1	82.9	57.3	84.4	89.9	85.1	91.1	85.3	85.1	93.2	89	86.5	82.8	79.1	64.1	73.1	94.6	78.3	90.7	94.6	84	68.8	61	80.2	77
	n7	Per capita sulfur dioxide emissions	0.00484907	0.0170406	0.0195032	0.0389382	0.0567917	0.025694	0.0150283	0.0136123	0.0102281	0.0133413	0.0121188	0.00887188	0.0104617	0.0130126	0.0189623	0.0145985	0.0115613	0.0103937	0.00806987	0.0112168	0.00371263	0.0201072	0.011205	0.0318355	0.0149267	0.0244974	0.0243314	0.0275625	0.0641779	0.0345476
	n8	Harmless treatment rate of domestic waste	98.24	100	72.56	77.5	83.47	80.45	49.21	43.69	61.04	93.77	96.43	86.99	94.55	88.27	92.54	84.42	61.02	86.35	72.12	95.49	91.35	99.55	88.43	88.56	74.13	90.27	41.7	89.46	66.95	79.48
	n9	Green coverage rate of built-up area	45.6	34.53	42.07	38.29	34.09	39.78	34.17	36.32	38.22	42.12	38.39	39.47	41.39	46.81	41.51	36.64	38.35	36.84	41.1	37.35	41.81	40.18	38.21	32.31	38.73	38.68	27.85	31.06	37.45	36.64
Economy	n10	GDP index	108.1	116.4	111.3	113	114.3	112.2	113.8	112.3	108.2	111	109	113.5	112.3	112.5	110.9	111.9	113.8	112.8	110	112.3	112	116.4	115	115	113.7	113.9	112.5	113.5	112.1	112
	n11	GDP per capita	8.1658	8.5213	3.3969	3.1357	5.7974	5.076	3.846	3.2819	8.256	6.229	5.9249	2.5659	4.7377	2.615	4.7335	2.8661	3.4197	2.988	5.0807	2.5326	2.8898	3.45	2.6133	1.6413	1.9265	3.3464	1.9595	2.9522	3.3043	3.0087
	n12	Public budget revenue per capita	1.48929	1.0739	0.240007	0.337721	0.546667	0.603046	0.309194	0.260185	1.46108	0.65186	0.576753	0.245235	0.403632	0.234699	0.358611	0.1834	0.265204	0.230012	0.52498	0.20403	0.387672	0.509877	0.254011	0.222872	0.23995	0.400839	0.175541	0.267191	0.344014	0.326177
Coordination	n13	Urbanization rate	86.2	80.5	45.6	49.68	56.62	64.05	53.4	56.5	89.3	61.9	62.3	44.8	58.1	45.7	50.95	40.57	51.83	45.1	66.5	41.8	50.5	55.02	41.83	34.96	36.8	47.3	37.15	46.22	49.82	43.54
	n14	The proportion of output value of secondary and tertiary industries in GDP	99.2	98.6	88.1	94.2	90.9	91.4	87.9	86.5	99.3	93.7	95.1	86.8	90.8	88.1	91.2	87	86.9	85.9	95	82.5	73.8	91.6	85.9	87.3	84.1	90.2	86.5	90.7	91.2	82.8
Green	n15	Parkland area per capita	11.33	10.3	14.26	10.17	14.47	10.56	10.53	11.47	7.01	13.34	11.77	11.88	11.72	13.49	16	8.9	10.11	8.81	14.35	11.02	12.51	17.87	10.73	7.26	10.26	11.41	8.32	9.65	16.03	9.48
	n16	Consumption of chemical fertilizers	13.8	24.4	326.3	114.6	176.9	144.6	195.2	228.4	12	337.2	92.1	329.7	120.9	140.8	473.6	673.7	354.9	242.5	241.3	242.7	47.7	95.6	251.2	94.1	200.5	207.3	87.2	8.3	38.2	183.7
Innovation	n17	The proportion of science, technology and education in GDP	0.0432656	0.0320581	0.0279547	0.0399518	0.0291716	0.0284023	0.0322647	0.0323526	0.0399954	0.0266058	0.0277027	0.041942	0.0254673	0.0423616	0.0254954	0.0339285	0.0271161	0.029629	0.0269081	0.0413911	0.0543474	0.034335	0.0347373	0.0698967	0.0574939	0.0446337	0.0592685	0.0801406	0.0527492	0.0644821
	n18	Number of students in higher education per 10,000 persons	291.235	331.883	158.725	165.452	154.909	205.848	204.71	185.177	217.803	210.084	166.114	166.097	181.392	184.607	170.757	159.794	232.792	161.904	145.386	129.191	178.608	194.523	141.53	99.2009	105.285	257.781	158.064	80.4706	137.415	117.136
	n19	Number of patent applications granted	40888	13982	11119	4974	2262	19176	4920	12236	47960	199814	130190	32681	21857	5550	58844	19259	19035	16064	128413	4402	765	15525	28446	3386	4199	11662	2383	538	613	2642
Openness	n20	Openness to the outside world	0.513863	0.637924	0.221698	0.0932377	0.0666728	0.328223	0.140876	0.134298	1.45742	0.76443	0.702273	0.128033	0.494977	0.154479	0.405162	0.0853488	0.111033	0.0660114	1.22207	0.178106	0.344338	0.157929	0.123212	0.0557267	0.0890208	0.0726984	0.100702	0.0294506	0.0863098	0.292309
	n21	FDI (Foreign Direct Investment)	705447	1305602	468095	207278	404125	2426739	494705	345694	1260100	3213173	1166601	662887	620111	605881	1116022	1008209	465503	615031	2232847	101381	158087	1057862	1102733	71674	173800	235483	7024	16893	34226	33485
Sharing	n22	Public library collections per 10,000 persons	9.47038	9.99223	2.40125	3.67424	4.42381	7.05588	5.73022	4.61775	29.3645	6.8135	8.17207	2.30465	5.49089	3.7089	4.03652	2.26025	4.1872	3.58166	5.60668	4.29818	5.88169	3.93538	3.89519	3.44296	3.66919	3.26831	4.52235	6.47213	8.07744	5.47845
	n23	Number of doctors per 10,000 persons	54.4509	29.8191	18.6257	24.2372	23.1738	22.9716	21.8522	20.0244	37.8699	17.9237	26.0382	12.2987	17.5924	13.2221	19.3967	14.3433	16.5628	15.7858	21.5534	13.8123	17.1036	14.887	16.9782	10.715	14.178	16.819	14.9768	20.4381	18.8113	22.4864
	n24	Public finance expenditure per capita	1.60766	1.3257	0.488555	0.657904	1.2045	0.891136	0.800805	0.728764	1.66771	0.787679	0.703385	0.55345	0.590909	0.564695	0.519048	0.45258	0.558357	0.533804	0.638981	0.547961	0.887683	0.880521	0.580735	0.648481	0.632634	0.783095	0.69856	1.70278	1.10393	1.03431

## Sheet: 2012
			Beijing	Tianjin	Hebei	Shanxi	Inner Mongolia	Liaoning	Jilin	Heilongjiang	Shanghai	Jiangsu	Zhejiang	Anhui	Fujian	Jiangxi	Shandong	Henan	Hubei	Hunan	Guangdong	Guangxi	Hainan	Chongqing	Sichuan	Guizhou	Yunnan	Shaanxi	Gansu	Qinghai	Ningxia	Xinjiang
Resources carrying capacity	n1	Per capita cultivated land area	0.106751	0.310866	0.899937	1.12556	3.68974	1.13896	2.55007	4.13299	0.0790613	0.578878	0.361402	0.982181	0.357097	0.684624	0.788407	0.867191	0.915383	0.624528	0.246781	0.942802	0.819694	0.83236	0.833573	1.30658	1.3361	1.06192	2.08861	1.02675	1.98195	2.30569
	n2	Water resources per capita	193.239	237.993	324.242	294.98	2052.68	1247.83	1674.49	2194.61	143.404	472.007	2641.29	1172.63	4047.78	4836.01	283.926	282.577	1410.97	3005.68	1921	4476.04	4130.76	1626.5	3587.16	2801.82	3637.91	1041.91	1038.36	15687.2	168.035	4055.51
	n3	Proportion of nature reserve in the area under jurisdiction	7.97	8.06	3.61	7.44	11.57	12.39	12.43	14.85	5.22	4.1	1.53	3.76	3.11	7.55	4.71	4.4	5.14	6.07	6.73	5.98	6.97	10.32	18.54	5.41	7.45	5.65	16.17	30.21	10.34	12.95
	n4	Forest coverage rate	31.72	8.24	22.29	14.12	20	35.13	38.93	42.39	9.41	10.48	57.41	26.06	63.1	58.32	16.72	20.16	31.14	44.76	49.44	52.71	51.98	34.85	34.31	31.61	47.5	37.26	10.42	4.57	9.84	4.02
	n5	Electricity consumption per capita	4225.02	5112.58	4223.29	4890.25	8099.93	4328.73	2316.02	2159.39	5685.72	5783.98	5861.88	2273.05	4214.24	1926.48	3917.98	2921.27	2609.19	2026.27	4360.4	2463.52	2347.06	2455.1	2266.78	3004.3	2824.35	2842.32	3858.54	10506.8	11461.7	4885.39
Environmental carrying capacity	n6	Urban sewage treatment rate	83.2	88.2	94.3	88	85.6	84.6	82.4	60.8	91.3	90.7	87.5	94.5	85.6	84.3	94.2	87.8	87.1	85.8	88.3	87.8	75.3	90.1	83.6	91.4	94.7	88.5	75.4	60.4	93.4	84.3
	n7	Per capita sulfur dioxide emissions	0.00453532	0.015888	0.0184041	0.0360514	0.055623	0.0241219	0.0146699	0.0134142	0.00958727	0.0125249	0.0114253	0.00867718	0.00990532	0.0126043	0.0180569	0.0135648	0.0107695	0.00971481	0.00754411	0.0107673	0.00385053	0.0191775	0.0107036	0.0298813	0.0144283	0.0224816	0.0222106	0.0268425	0.0628306	0.0356564
	n8	Harmless treatment rate of domestic waste	99.12	99.81	81.39	80.25	91.22	87.16	45.79	47.58	83.59	95.93	98.97	91.14	96.42	89.05	98.06	86.4	71.51	95.01	79.11	98	99.91	99.28	88.29	91.92	82.7	88.49	41.68	89.21	70.64	78.74
	n9	Green coverage rate of built-up area	46.2	34.88	40.98	38.6	36.17	40.17	33.94	35.98	38.29	42.17	39.86	38.8	42.03	45.95	42.12	36.9	38.86	37.01	41.23	37.5	41.19	42.94	38.69	32.8	39.3	40.36	30.02	32.5	38.37	35.88
Economy	n10	GDP index	107.732	113.85	109.628	110.143	111.463	109.546	111.973	110.025	107.455	110.131	107.982	112.103	111.446	110.951	109.761	110.146	111.25	111.258	108.155	111.264	109.131	113.551	112.551	113.565	112.96	112.857	112.556	112.252	111.499	111.959
	n11	GDP per capita	8.7475	9.3173	3.6584	3.3628	6.3886	5.6649	4.3415	3.5711	8.5373	6.8347	6.3374	2.8792	5.2763	2.88	5.1768	3.1499	3.8572	3.348	5.4095	2.7952	3.2377	3.8914	2.9608	1.971	2.2195	3.8564	2.1978	3.3181	3.6394	3.3796
	n12	Public budget revenue per capita	1.60196	1.24546	0.286007	0.419953	0.62363	0.707537	0.378582	0.303383	1.5727	0.739988	0.628305	0.299385	0.473899	0.304621	0.419147	0.216918	0.315462	0.26844	0.587991	0.249052	0.461832	0.578434	0.299803	0.291055	0.287218	0.426498	0.201897	0.325238	0.407851	0.4071
Coordination	n13	Urbanization rate	86.2	81.55	46.8	51.26	57.74	65.65	53.7	56.9	89.3	63	63.2	46.5	59.6	47.51	52.43	42.43	53.5	46.65	67.4	43.53	51.6	56.98	43.53	36.41	39.31	50.0207	38.75	47.44	50.67	43.98
	n14	The proportion of output value of secondary and tertiary industries in GDP	99.1599	98.6691	88.0088	94.2349	90.8783	91.3234	88.1725	84.5623	99.3668	93.6767	95.1886	87.3418	90.982	88.2598	91.4389	87.2648	87.1968	86.4396	95.0108	83.3345	75.0821	91.7612	86.1884	86.9836	83.9512	90.5203	86.1863	90.657	91.4833	82.4049
Green	n15	Parkland area per capita	11.87	10.54	14	10.82	15.52	10.89	10.96	11.75	7.08	13.63	12.47	11.92	12.1	14.1	16.37	9.23	10.5	8.83	15.82	11.42	12.01	18.13	10.79	9.38	10.43	11.58	9.52	9.81	15.71	10
	n16	Consumption of chemical fertilizers	13.7	24.5	329.3	118.3	189	146.9	206.7	240.3	11	331	92.2	333.5	120.9	141.3	476.3	684.4	354.9	249.1	245.4	249	45.5	96	253	98.2	210.2	239.8	92.1	9.3	39.4	192.7
Innovation	n17	The proportion of science, technology and education in GDP	0.0463436	0.0353037	0.0342532	0.0488197	0.0294432	0.0334064	0.0398699	0.0425393	0.0443163	0.0297428	0.030112	0.0472887	0.0310008	0.0501631	0.0287279	0.0397357	0.0353593	0.0386278	0.0306289	0.0484883	0.0598312	0.0439392	0.044092	0.0772728	0.0686246	0.0510784	0.06798	0.0945249	0.049572	0.0675345
	n18	Number of students in higher education per 10,000 persons	285.721	334.794	160.383	176.505	157.212	212.823	210.498	183.761	212.817	211.007	170.219	170.847	187.138	188.972	171.244	165.748	239.849	163.013	152.618	134.396	189.803	211.75	151.517	110.163	109.933	273.442	167.24	84.9102	149.013	120.35
	n19	Number of patent applications granted	50511	19782	15315	7196	3084	21223	5930	20268	51508	269944	188463	43321	30497	7985	75496	26791	24475	23212	153598	5900	1093	20364	42218	6059	5853	14908	3662	527	844	3439
Openness	n20	Openness to the outside world	0.454268	0.601431	0.195465	0.0864664	0.0555272	0.30065	0.129422	0.130076	1.35797	0.687398	0.634043	0.120878	0.4684	0.147397	0.374417	0.115873	0.0920268	0.0611251	1.23371	0.197944	0.321877	0.250301	0.136712	0.0465449	0.074207	0.0663396	0.0800305	0.0271013	0.072071	0.28283
	n21	FDI (Foreign Direct Investment)	804160	1501633	580486	250379	417665	2679315	581587	399140	1518500	3575956	1306926	863811	633774	682431	1235267	1211777	566591	728034	2410578	74853	164119	1057661	1055054	109805	218900	293609	6110	20578	34809	40795
Sharing	n22	Public library collections per 10,000 persons	10.0674	10.3968	2.65458	4.04871	4.85878	7.90748	6.21568	4.755	30.2568	8.1941	9.75779	3.78158	7.7215	4.04625	4.37509	2.39977	4.36268	3.803	6.19902	4.54229	10.1283	5.1678	4.16384	3.98204	4.03379	3.72934	4.70405	6.62083	8.22843	5.92444
	n23	Number of doctors per 10,000 persons	35.9445	21.7174	19.6211	24.1825	23.9083	23.0057	22.324	20.4979	23.4399	19.9372	23.7307	15.3742	17.8068	14.893	20.6986	17.8193	18.8872	17.539	18.781	16.6687	17.5117	17.6537	20.1675	14.1154	14.6954	18.5103	16.6654	20.7931	20.1038	22.6355
	n24	Public finance expenditure per capita	1.78094	1.51662	0.559785	0.764217	1.37598	1.03864	0.898486	0.82721	1.75767	0.887334	0.759883	0.661491	0.695705	0.670353	0.609658	0.532256	0.650596	0.620432	0.697362	0.637596	1.02834	1.03442	0.674945	0.790938	0.766829	0.885617	0.799039	2.02217	1.33556	1.21824

## Sheet: 2013
			Beijing	Tianjin	Hebei	Shanxi	Inner Mongolia	Liaoning	Jilin	Heilongjiang	Shanghai	Jiangsu	Zhejiang	Anhui	Fujian	Jiangxi	Shandong	Henan	Hubei	Hunan	Guangdong	Guangxi	Hainan	Chongqing	Sichuan	Guizhou	Yunnan	Shaanxi	Gansu	Qinghai	Ningxia	Xinjiang
Resources carrying capacity	n1	Per capita cultivated land area	0.104596	0.297716	0.893434	1.11907	3.68312	1.13661	2.54663	4.13664	0.077842	0.577065	0.359858	0.975671	0.354716	0.682706	0.784259	0.864804	0.910812	0.620198	0.246317	0.936512	0.811701	0.826869	0.830739	1.29863	1.32715	1.06057	2.08305	1.01802	1.9583	2.27894
	n2	Water resources per capita	118.586	101.485	240.566	349.555	3848.6	1055.17	2208.17	3702.13	116.903	357.563	1697.2	974.522	3062.75	3155.33	300.445	226.44	1364.91	2373.56	2131.24	4376.83	5636.8	1603.87	3052.88	2174.15	3652.24	941.258	1042.33	11216.6	175.255	4251.88
	n3	Proportion of nature reserve in the area under jurisdiction	7.97	7.99	3.69	7.09	11.57	13.35	12.97	14.96	5.22	3.92	1.55	3.76	3.09	7.46	4.81	4.42	5.48	6.06	7.21	5.99	6.96	10.25	18.54	5.01	7.45	5.67	16.42	30.13	10.29	11.74
	n4	Forest coverage rate	35.84	9.87	23.41	18.03	21.03	38.24	40.38	43.16	10.74	15.8	59.07	27.53	65.95	60.01	16.73	21.5	38.4	47.77	51.26	56.51	55.38	38.43	35.22	37.09	50.03	41.42	11.28	5.63	11.89	4.24
	n5	Electricity consumption per capita	4317.72	5260.74	4433.88	5048.07	8735.97	4575.08	2376.51	2203.89	5840.63	6242.99	6280.56	2534.2	4506.44	2094.39	4194.96	3079.86	2810.4	2127	4537.89	2622.9	2591.62	2738.24	2404.03	3215.87	3114.85	3061.15	4156.37	11704.8	12399.8	6800.13
Environmental carrying capacity	n6	Urban sewage treatment rate	84.6	90	94.6	88.4	88.2	90	84.2	75.7	87.1	92.1	89.3	96.2	87.3	83.1	94.9	90.8	91.6	88.4	92.2	85.8	75	94	83.2	94	92.1	89	81.3	61.6	94.4	87.8
	n7	Per capita sulfur dioxide emissions	0.00411583	0.0147283	0.0175203	0.0345867	0.0543997	0.0233951	0.0138646	0.0127534	0.00893726	0.0118607	0.0107924	0.00831452	0.00956554	0.0123327	0.0169002	0.0133213	0.0103355	0.0095854	0.00715799	0.0100018	0.00362056	0.0184406	0.0100741	0.0281657	0.0141487	0.0214174	0.0217638	0.0271195	0.0595717	0.0366308
	n8	Harmless treatment rate of domestic waste	99.3	96.8	83.28	87.9	93.55	87.61	60.85	54.41	90.58	97.36	99.44	98.82	98.16	93.28	99.47	90.04	85.4	96.03	84.62	96.44	99.9	99.43	94.98	92.23	87.62	96.44	42.29	77.83	92.5	78.09
	n9	Green coverage rate of built-up area	47.1	34.93	41.2	40.02	36.19	40.17	31.4	35.99	38.36	42.44	40.26	39.85	42.77	45.09	42.63	37.6	38.12	37.63	41.5	37.65	42.06	41.66	38.41	34.46	37.76	40.19	32.07	31.2	38.49	36.4
Economy	n10	GDP index	107.7	112.5	108.2	108.9	109	108.7	108.3	108	107.7	109.6	108.2	110.4	111	110.1	109.6	109	110.1	110.1	108.5	110.2	109.9	112.3	110	112.5	112.1	111	110.8	110.8	109.8	111
	n11	GDP per capita	93213	99607	38716	34813	67498	61685.9	47191	37509.3	90092	74607	68462	31684	57856	31771	56322.6	34174	42612.7	36763	58540	30588	35317	42795	32454	22921.7	25083	42692	24296	36510	39420	37181
	n12	Public budget revenue per capita	1.73118	1.41221	0.31307	0.468792	0.689052	0.761688	0.420518	0.333087	1.70155	0.827316	0.690601	0.344137	0.561591	0.35851	0.468485	0.256598	0.377862	0.303542	0.665301	0.279212	0.537278	0.570116	0.343419	0.344471	0.343809	0.464487	0.235178	0.387439	0.471327	0.498383
Coordination	n13	Urbanization rate	86.3	82.01	48.12	52.56	58.71	66.45	54.2	57.4	89.6	64.11	64	47.86	60.77	48.87	53.75	43.8	54.51	47.96	67.76	44.81	52.74	58.34	44.9	37.83	40.48	51.3107	40.13	48.51	52.01	44.47
	n14	The proportion of output value of secondary and tertiary industries in GDP	99.2	98.7	87.7	93.9	90.5	91.4	88.3	82.5	99.4	93.9	95.2	87.6	91.1	88.6	91.3	87.4	87.4	87.3	95.1	83.7	76	91.9	86.9	87.1	83.8	90.4	86	90.1	91.3	82.4
Green	n15	Parkland area per capita	12.7242	10.968	14.0544	11.1791	16.902	11.0637	11.7809	12.1057	7.0977	14.0127	12.4382	12.4745	12.5727	14.1194	16.8125	9.57809	10.8321	8.98943	15.9405	11.4802	12.4663	18.0371	11.2077	11.4087	10.5649	11.7665	11.7592	9.65968	17.5071	10.0759
	n16	Consumption of chemical fertilizers	12.8	24.3	331	121	202.4	151.8	216.8	245	10.8	326.8	92.4	338.4	120.6	141.6	472.7	696.4	351.9	248.2	243.9	255.7	47.6	96.6	251.1	97.4	219	241.7	94.7	9.8	40.4	203.2
Innovation	n17	The proportion of science, technology and education in GDP	0.0469654	0.0385636	0.0313549	0.047968	0.0290218	0.0291185	0.0353826	0.0375371	0.0433847	0.0293699	0.030396	0.044449	0.029207	0.0495765	0.0283227	0.0389206	0.0311262	0.0353002	0.0336131	0.0462017	0.0598759	0.0376031	0.0421129	0.0743041	0.0621594	0.0466262	0.0633077	0.0618236	0.0482012	0.0684812
	n18	Number of students in higher education per 10,000 persons	283.197	332.778	160.158	186.461	159.833	220.509	217.908	187.184	209.002	212.162	174.541	174.487	193.564	190.584	174.507	171.918	245.117	164.525	160.643	139.039	192.278	222.02	156.756	119.65	117.052	286.298	171.546	87.7049	159.665	122.963
	n19	Number of patent applications granted	62671	24856	18186	8565	3836	21656	6219	19819	48680	239645	202350	48849	37511	9970	76976	29482	28760	24392	170430	7884	1331	24828	46171	7915	6804	20836	4737	502	1211	4998
Openness	n20	Openness to the outside world	0.417825	0.580095	0.197427	0.084335	0.0529437	0.277576	0.12018	0.117967	1.24505	0.621076	0.602543	0.126628	0.439688	0.145354	0.356683	0.120902	0.0894649	0.0614629	1.27641	0.16668	0.290484	0.287649	0.129932	0.0367951	0.0836139	0.0780451	0.067599	0.0252238	0.0629755	0.278302
	n21	FDI (Foreign Direct Investment)	852418	1682897	644720	280667	484258	2903996	676415	464231	1678000	3325922	1415898	1068772	667896	755096	1405315	1345659	688847	870482	2532719	70008	181060	1059715	1057481	157415	251500	367800	7129	9372	20384	48102
Sharing	n22	Public library collections per 10,000 persons	9.79755	10.0107	2.64217	4.03791	5.30429	7.64332	5.8047	4.80694	29.9733	7.26725	9.39393	2.94618	6.53614	4.39985	4.54317	2.35643	4.56676	3.41105	5.73156	4.47095	4.21246	3.80084	3.75989	3.30112	3.76704	3.65865	4.74877	6.55553	9.09068	5.48339
	n23	Number of doctors per 10,000 persons	58.516	31.8439	20.0106	25.0141	25.1618	24.3849	23.1461	21.2941	40.4541	22.2718	28.6476	14.2329	19.9915	14.5775	24.1108	16.3604	18.9919	17.8027	24.009	15.3653	18.4011	16.4187	19.0405	13.0558	16.2592	18.7868	16.4556	23.1212	21.4143	23.3916
	n24	Public finance expenditure per capita	1.97355	1.73155	0.601366	0.834792	1.47602	1.18392	0.997649	0.878531	1.87508	0.982239	0.860398	0.721365	0.813143	0.767401	0.687201	0.593021	0.753862	0.701116	0.79021	0.679946	1.12945	1.03107	0.76735	0.880201	0.874091	0.973716	0.894447	2.12542	1.41011	1.35456

## Sheet: 2014
			Beijing	Tianjin	Hebei	Shanxi	Inner Mongolia	Liaoning	Jilin	Heilongjiang	Shanghai	Jiangsu	Zhejiang	Anhui	Fujian	Jiangxi	Shandong	Henan	Hubei	Hunan	Guangdong	Guangxi	Hainan	Chongqing	Sichuan	Guizhou	Yunnan	Shaanxi	Gansu	Qinghai	Ningxia	Xinjiang
Resources carrying capacity	n1	Per capita cultivated land area	0.102184	0.2882	0.885089	1.11206	3.68491	1.13453	2.54411	4.13775	0.0775763	0.574648	0.35886	0.96533	0.35113	0.679304	0.778486	0.860312	0.904694	0.615853	0.24462	0.927703	0.803654	0.820662	0.827297	1.29421	1.3168	1.05823	2.07561	1.00463	1.94245	2.24956
	n2	Water resources per capita	95.1	76.1	144.3	305.1	2149.9	332.4	1112.2	2463.1	194.8	502.3	2057.3	1285.4	3218	3600.6	152.1	300.7	1574.3	2680.1	1608.4	4203.3	4266	2155.9	3148.5	3461.1	3673.3	932.8	767	13675.5	153	3186.9
	n3	Proportion of nature reserve in the area under jurisdiction	7.97	7.99	3.69	7.09	11.57	13.35	12.97	14.96	5.22	3.92	1.55	3.76	3.09	7.46	4.81	4.42	5.48	6.06	7.21	5.99	6.96	10.25	18.54	5.01	7.45	5.67	16.42	30.13	10.29	11.74
	n4	Forest coverage rate	35.84	9.87	23.41	18.03	21.03	38.24	40.38	43.16	10.74	15.8	59.07	27.53	65.95	60.01	16.73	21.5	38.4	47.77	51.26	56.51	55.38	38.43	35.22	37.09	50.03	41.42	11.28	5.63	11.89	4.24
	n5	Electricity consumption per capita	4354.32	5236.39	4488.23	4996.24	9647.66	4642.97	2426.64	2242.16	5643.16	6297.16	6365.99	2605.92	4875.96	2242.45	4314.53	3094.08	2848.25	2123.91	4881.79	2751.35	2789.37	2899.5	2475.17	3345.9	3244.34	3247.71	4228.02	12405	12821	8269.1
Environmental carrying capacity	n6	Urban sewage treatment rate	86.1	91	95.1	88.4	89.2	89.1	90.1	77.2	89.7	93.5	90.7	96.2	88.7	83.8	95.3	92.5	92.1	90.1	91.6	87.5	71.4	93	85.4	94.8	91.1	91.6	85	59.2	92.4	86.2
	n7	Per capita sulfur dioxide emissions	0.00366636	0.0137904	0.0161146	0.0331195	0.0523912	0.0226509	0.0135283	0.0123193	0.0077535	0.0113656	0.0104212	0.00810455	0.00935365	0.0117657	0.0162448	0.0126982	0.0100378	0.00925783	0.00680809	0.00981489	0.00361019	0.0176162	0.00978378	0.0263911	0.0135066	0.0206887	0.0222154	0.0264666	0.0569637	0.0371192
	n8	Harmless treatment rate of domestic waste	99.6	96.7	86.6	92.1	96.1	91.6	61.9	58.9	100	98.1	100	99.5	97.9	93.1	100	92.8	90.2	99.7	86.4	95.4	99.8	99.2	95.4	93.3	92.5	95.8	62.6	86.3	93.3	81.9
	n9	Green coverage rate of built-up area	49.1	34.9	41.9	40.1	39.8	40.1	35.8	36	38.4	42.6	40.8	41.2	42.8	44.6	42.8	38.3	37.9	38.6	41.4	39.3	41.3	406	37.5	34	38.1	40.5	30.8	31.6	38	36.8
Economy	n10	GDP index	107.3	110	106.5	104.9	107.8	105.8	106.5	105.6	107	108.7	107.6	109.2	109.9	109.7	108.7	108.9	109.7	109.5	107.8	108.5	108.5	110.9	108.5	110.8	108.1	109.7	108.9	109.2	108	110
	n11	GDP per capita	94648	100105	38909	34984	67836	61996	47428	37697	90993	753.54	68805	32001	58145	31930	56885	34211	42826	36943	58833	30741	35663	43223	32617	23151	25322	43117	24539	36875	39613	37553
	n12	Public budget revenue per capita	1.87136	1.57571	0.331341	0.499079	0.735996	0.727119	0.437275	0.339502	1.89017	0.908686	0.74837	0.364695	0.620654	0.414317	0.513518	0.290299	0.441351	0.335875	0.752059	0.299175	0.614961	0.642601	0.376053	0.389587	0.360216	0.500768	0.259618	0.431698	0.513384	0.558024
Coordination	n13	Urbanization rate	86.35	82.27	49.33	53.79	59.51	67.05	54.81	58.01	89.6	65.21	64.87	49.15	61.8	50.22	55.01	45.2	55.67	49.28	68	46.01	53.76	59.6	46.3	40.01	41.73	52.57	41.68	49.78	53.61	46.07
	n14	The proportion of output value of secondary and tertiary industries in GDP	99.2	98.8	88.3	93.8	90.8	92	89	82.7	99.5	94.4	95.5	88.5	91.6	89.3	91.9	88.1	88.4	88.4	95.3	84.6	76.9	92.6	87.6	86.2	84.5	91.1	86.8	90.6	92.1	83.4
Green	n15	Parkland area per capita	15.94	9.73	14.45	11.3	18.8	11.61	12.05	12.1	7.33	14.41	12.9	13.2	12.76	14.13	17.1	9.93	11.1	9.85	16.28	11.19	13.01	16.97	11.26	12.5	11	12.48	12.79	10.78	17.91	10.74
	n16	Consumption of chemical fertilizers	11.6	23.3	335.6	119.6	222.7	151.6	226.7	251.9	10.2	323.6	89.6	341.4	122.6	142.9	468.1	705.8	348.3	247.8	249.6	258.7	49.5	97.3	250.2	101.3	226.9	230.2	97.6	9.7	39.7	237
Innovation	n17	The proportion of science, technology and education in GDP	0.0480413	0.039805	0.0312765	0.0440027	0.0287358	0.0249178	0.032134	0.0362648	0.0406455	0.0281458	0.0308411	0.0418567	0.0291822	0.0490047	0.0270604	0.0367114	0.0331569	0.0330155	0.0307227	0.0459685	0.054126	0.0356274	0.039902	0.0735313	0.0560369	0.0417576	0.061786	0.0723738	0.0488136	0.0655138
	n18	Number of students in higher education per 10,000 persons	280.938	333.418	157.684	195.509	162.241	227.347	224.663	190.612	208.839	213.396	177.599	177.634	196.658	201.765	183.539	178.014	244.102	168.666	167.306	147.647	199.961	231.212	163.185	131.243	122.411	291.288	174.566	90.7496	168.326	126.379
	n19	Number of patent applications granted	74661	26351	20132	8371	4031	19525	6696	15412	50488	200032	188544	48380	37857	13831	72818	33366	28290	26637	179953	9664	1597	24312	47120	10107	8124	22820	5097	619	1424	5238
Openness	n20	Openness to the outside world	0.412127	0.564094	0.196822	0.0891064	0.052871	0.269064	0.120322	0.120181	1.17969	0.574874	0.578407	0.127291	0.420071	0.152892	0.339471	0.120392	0.0916447	0.0642971	1.12506	0.175931	0.297036	0.355574	0.131818	0.034061	0.0954587	0.0961472	0.0473209	0.0165363	0.08957	0.257601
	n21	FDI (Foreign Direct Investment)	904085	1886676	637196	295186	417182	2742335	765252	515551	1816600	2817416	1579725	1233978	711499	845074	1519511	1492688	792792	1026585	2727751	100119	191558	1062946	1065328	213053	270600	417557	10032	5010	14304	41700
Sharing	n22	Public library collections per 10,000 persons	10.3299	10.5339	2.85076	4.03509	5.78443	8.11432	6.03924	4.48996	30.3504	7.88945	10.2288	2.8818	6.98896	4.68296	4.57657	2.45019	4.85213	3.59507	5.93715	5.22087	4.56257	4.15246	3.88452	3.46921	3.95418	4.0106	5.04438	6.75815	10.423	5.62228
	n23	Number of doctors per 10,000 persons	37.2	22	21.4	24.6	24.8	23.1	23	21.2	25.2	22.4	26.5	17.1	19.8	16.4	23.6	20.1	21.7	19.8	20.2	18.2	19.5	19.4	22.1	16.5	16	20.3	18.4	22.2	22.7	23.8
	n24	Public finance expenditure per capita	2.10254	1.90158	0.633437	0.845746	1.54889	1.15702	1.05859	0.895961	2.02945	1.06438	0.936741	0.766743	0.868812	0.854844	0.733202	0.638903	0.848375	0.74475	0.853473	0.731971	1.21787	1.10478	0.834964	1.00992	0.941447	1.04967	0.980892	2.3112	1.51125	1.44377

[truncated: 6 more sheets: 2015, 2016, 2017, 2018, 2019, 2020]
