# Supplementary material for: Coupling coordination and spatial-temporal characteristics of resource and environmental carrying capacity and high-quality development
Source: Frontiers journal article supplement (doi:10.3389/fenvs.2022.971508), 2022-11-18
Supplement: Table_2.XLSX [file Table_2.XLSX]

## Sheet: all
region	Beijing	Tianjin	Hebei	Shanxi	Inner Mongolia	Liaoning	Jilin	Heilongjiang	Shanghai	Jiangsu	Zhejiang	Anhui	Fujian	Jiangxi	Shandong	Henan	Hubei	Hunan	Guangdong	Guangxi	Hainan	Chongqing	Sichuan	Guizhou	Yunnan	Shaanxi	Gansu	Qinghai	Ningxia	Xinjiang	北京	天津	河北	山西	内蒙古	辽宁	吉林	黑龙江	上海	江苏	浙江	安徽	福建	江西	山东	河南	湖北	湖南	广东
year	2005	2005	2005	2005	2005	2005	2005	2005	2005	2005	2005	2005	2005	2005	2005	2005	2005	2005	2005	2005	2005	2005	2005	2005	2005	2005	2005	2005	2005	2005	2006	2006	2006	2006	2006	2006	2006	2006	2006	2006	2006	2006	2006	2006	2006	2006	2006	2006	2006
Per capita cultivated land area	0.223602	0.46558	1.00471	1.36769	3.43713	0.989055	2.0539	3.08194	0.177222	0.677151	0.433912	0.975768	0.405856	0.694363	0.831455	0.864638	0.866813	0.624881	0.355906	0.945901	0.920411	0.738969	1.11655	1.31461	1.44306	1.38185	1.93705	1.26703	2.12886	1.98294	0.217521	0.451721	0.997869	1.35959	3.42136	0.977476	2.04862	3.07952	0.173609	0.670424	0.426767	0.977365	0.403232	0.689882	0.826007	0.863533	0.869401	0.623305	0.351698
Water resources per capita	151.207	102.212	196.999	251.51	1917.3	896.3	2066.8	1954.2	138.015	626.6	2077.2	1178.8	3975.5	3513.2	451.041	597.22	1640.6	2649.5	1906.4	3703.8	3722.4	1827.4	3569.6	2244.4	4161.7	1322.7	1042.4	16176.9	143.603	4808.9	141.5	95.5	156.1	263.1	1719.8	615.5	1300.3	1904.8	153.9	538.3	1829.5	949.3	4577.7	3768.7	214.8	342.8	1122	2794.9	2396.1
Proportion of nature reserve in the area under jurisdiction	8	14.4	3	7.3	12	11.2	12.4	10.4	14.8	7.9	2.6	3.1	3.3	5.4	6.6	4.5	5.5	5	4.6	6.2	5.3	10.8	18.4	5	10.7	4.8	20.3	29	9.8	13.6	7.86	14.5	3.19	7.22	11.4	10.91	12.34	11.93	14.79	6.75	2.59	3.34	3.06	5.53	6.63	4.52	5.45	5.22	4.64
Forest coverage rate	21.26	8.14	17.69	13.29	17.7	32.97	38.13	39.54	3.17	7.54	54.41	24.03	62.96	55.86	13.44	16.19	26.77	40.63	46.49	41.41	48.87	22.25	30.27	23.83	40.77	32.55	6.66	4.4	6.08	2.94	21.26	8.14	17.69	13.29	17.7	32.97	38.13	39.54	3.17	7.54	54.41	24.03	62.96	55.86	13.44	16.19	26.77	40.63	46.49
Electricity consumption per capita	3709.62	3689.74	2192.26	2820.66	2798.49	2631.04	1392.6	1455.1	5185.43	2934.38	3353.02	951.242	2140.28	909.255	2067.05	1442.15	1381.63	1066.12	2907.94	1094.74	985.628	1242.6	1147.82	1305.55	1252.25	1388.25	1886.97	3804.05	5081.88	1542.99	3868.26	4033.95	2514.98	3252.38	3691.73	2875.85	1514.72	1561.72	5455.34	3403.65	3833.8	1083.77	2436.32	1028.34	2440.73	1622.13	1540.06	1212.19	3228.75
Urban sewage treatment rate	70.11	57.96	53.76	56.23	51.11	47.33	27.61	35.88	70.84	76.77	59.46	52.34	54.52	34.92	59.85	45.85	47.62	40.55	45.03	46.41	64.99	34.65	42.69	26.82	61.76	31.94	41.03	18.49	53.93	69.68	55.67	73.78	59.48	63.63	60.22	52.08	48.75	30.36	32.77	74.92	81.82	61.53	57.49	58.82	34.93	69.18	54.08	54.52	42.72
Per capita sulfur dioxide emissions	0.0123537	0.0254075	0.0218216	0.0451863	0.0610226	0.0283582	0.0141016	0.0132984	0.0288526	0.0183679	0.0175582	0.00933007	0.013041	0.0142194	0.0216479	0.0173134	0.0125744	0.0145273	0.0140744	0.0219742	0.002657	0.0299142	0.0158305	0.0364075	0.0117303	0.0247849	0.0217039	0.0228361	0.0573826	0.0258209	0.0111322	0.0237209	0.0223978	0.0437926	0.0649562	0.0294779	0.0150202	0.0135496	0.027989	0.0172715	0.017249	0.0095581	0.0131816	0.0146117	0.0210764	0.0172913	0.0133497	0.0147272	0.0136178
Harmless treatment rate of domestic waste	95.9525	80.5249	45.7786	13.1225	42.6748	50.0391	40.1792	32.2677	35.7304	82.9025	82.4013	17.5976	85.9241	48.8654	58.2475	57.8776	61.0495	39.6914	50.5956	61.3776	69.0271	54.7811	51.2336	57.847	82.2363	39.7761	17.2263	100	50.3527	35.9051	92.48	85	46.54	23.08	48.28	54.08	17.81	23.34	57.91	83.77	86.32	31.41	58.09	50.69	70.11	46.28	34.83	46.31	55.78
Green coverage rate of built-up area	35.7	36.4	35	30.2	23.3	36.5	31.4	26.4	27.8	39.8	33.8	27.5	36.1	32.6	37	32.3	34.7	33.1	33.5	29.8	32.6	22.2	29.3	27.4	24.6	30.2	26.4	24	22.9	31.8	44.35	37	35.57	31.88	26.58	36.93	31.64	28.67	37.33	41.72	35.53	32.58	36.58	34.56	37.45	32.79	37.11	34.74	37.96
GDP index	111.831	114.702	113.429	112.6	123.831	112.317	112.1	111.607	111.1	114.48	112.785	111.599	111.638	112.833	115.245	114.221	112.1	111.6	113.8	113.181	110.244	111.5	112.611	111.6	109	112.6	111.847	112.17	110.94	110.9	112.8	114.5	113.4	111.8	118.7	113.8	115	112.1	112	114.9	113.9	112.8	114.8	112.3	114.8	114.4	113.2	112.2	114.6
GDP per capita	4.54437	3.57832	1.47823	1.2495	1.63308	1.89832	1.3348	1.44341	5.1474	2.456	2.77027	0.867514	1.86458	0.944	2.00965	1.13465	1.1431	1.0426	2.4435	0.878773	1.0871	1.0982	0.906	0.505196	0.7835	0.9899	0.747653	1.00447	1.0239	1.3108	5.0467	4.1163	1.6962	1.4123	2.0053	2.1788	1.572	1.6195	5.7695	2.8814	3.1874	1.0055	2.1471	1.0798	2.3794	1.3313	1.3296	1.195	2.8332
Public budget revenue per capita	0.597666	0.318169	0.0752739	0.109789	0.116285	0.15998	0.076271	0.0832999	0.797187	0.176947	0.217762	0.0545779	0.122376	0.0586694	0.116039	0.0573189	0.0657656	0.0624826	0.196563	0.0607373	0.0829471	0.0917824	0.0584101	0.0489266	0.0702582	0.0740103	0.0476109	0.0622877	0.0800698	0.0897106	0.706611	0.387952	0.0899585	0.172852	0.143253	0.191447	0.0900494	0.101189	0.86836	0.219428	0.260684	0.0700534	0.1521	0.0704129	0.145693	0.0723138	0.0836259	0.0753591	0.23425
Urbanization rate	83.62	75.11	37.69	42.11	47.2	58.7	52.52	53.1	89.09	50.11	56.02	35.5	47.3	37	45	30.65	43.2	37	60.68	33.62	45.2	45.2	33	26.87	29.5	37.23	30.02	39.25	42.28	37.15	84.33	75.73	38.44	43.01	48.64	58.99	52.97	53.5	88.7	51.9	56.5	37.1	48	38.68	46.1	32.47	43.8	38.71	63
The proportion of output value of secondary and tertiary industries in GDP	98.6	97	85.1	93.7	84.9	89	82.7	87.6	99.1	92	93.4	82	87.2	82.1	89.4	82.1	83.4	80.4	93.6	77.6	66.4	84.9	79.9	81.4	80.7	88.1	84.1	88	88.1	80.4	98.7	97.3	86.2	94.2	86.4	89.4	84.3	88.1	99.1	92.9	94.1	83.3	88.2	83.2	90.3	83.6	85	82.4	94
Parkland area per capita	7.38927	5.14728	1.50591	1.61508	2.08922	3.64529	2.72183	2.73104	6.7357	3.43639	2.68326	1.21401	1.65828	1.30678	2.97147	1.34794	2.38462	1.12918	4.34419	1.15059	2.0539	1.52021	1.36358	0.777823	0.966047	1.08241	1.35489	1.03494	2.32317	1.65271	10.68	6.59	7.87	6.63	9.39	7.93	7.34	7.29	7.33	9.6	6.99	7.28	7.51	7.74	12.77	7.93	8.34	6.99	9.25
Consumption of chemical fertilizers	14.84	23.29	303.39	95.7	116.72	119.86	138.1	150.92	14.44	340.81	94.27	285.67	122.02	129.39	467.63	518.137	285.83	209.867	204.62	201.25	37.3101	79.05	220.925	77.4095	142.65	147.3	75.92	6.99	29.93	107.77	14.84	24.56	304.89	98.27	128.51	121.08	146.7	162.2	14.53	342.01	93.98	294.29	120.86	132.58	489.82	540.43	292.48	214.72	212.13
The proportion of science, technology and education in GDP	0.0234692	0.0189317	0.01724	0.0249268	0.0206821	0.0183305	0.02123	0.0199453	0.0217236	0.0145414	0.0180174	0.0223251	0.0176879	0.0222174	0.0138466	0.0180982	0.0186226	0.0192916	0.0154344	0.0268253	0.0276657	0.0201093	0.0196914	0.048718	0.0364888	0.0276735	0.0359232	0.0382725	0.0334452	0.0288047	0.0247131	0.0194738	0.0165971	0.0259577	0.0202795	0.0186232	0.0221101	0.0222256	0.021775	0.0142678	0.0179036	0.0252783	0.0185797	0.0227844	0.0136492	0.0191021	0.0195732	0.0191989	0.0156382
Number of students in higher education per 10,000 persons	356.482	317.884	112.977	121.322	96.7737	156.207	149.949	141.588	248.943	155.157	132.974	96.2541	115.133	149.869	126.653	90.8171	177.349	119.326	95.1366	72.5882	84.5217	119.215	94.4272	55.43	57.233	179.286	88.4576	60.3186	81.6275	90.4547	357.861	332.448	125.053	132.275	105.514	168.707	159.774	154.852	256.933	173.004	144.552	108.623	129.663	177.581	143.745	103.716	191.863	130.902	108.403
Number of patent applications granted	10100	3045	3585	1220	845	6195	2023	2906	12603	13580	19056	1939	5147	1361	10743	3748	3860	3659	36894	1225	200	3591	4606	925	1381	1894	547	79	214	921	11238	4159	4131	1421	978	7399	2319	3622	16602	19352	30968	2235	6412	1536	15937	5242	4734	5608	43516
Openness to the outside world	0.636249	1.21031	0.15682	0.178223	0.111538	0.481101	0.166574	0.155602	1.62421	1.06717	0.754748	0.141179	0.708306	0.10014	0.394238	0.0701439	0.125547	0.087557	1.6085	0.115825	0.19412	0.112873	0.0851277	0.0844173	0.117828	0.137046	0.126516	0.0739127	0.159636	0.261183	0.713693	1.23044	0.160504	0.162061	0.101702	0.451737	0.162255	0.181264	1.70129	1.10136	0.810601	0.158824	0.679327	0.123779	0.399488	0.0700606	0.127371	0.0840321	1.64833
FDI (Foreign Direct Investment)	352638	332885	191256	27516	140007	359042	115102	152203	685000	1318339	772271	68845	260775	242258	1101441	122960	218475	233305	1517358	37866	70711	70423	110206	19568	29247	62839	2044	26600	14107	4749	455191	413077	201434	47199	196863	598554	165028	174901	710700	1743140	888935	139354	322047	280657	1020966	184526	244853	259335	1780780
Public library collections per 10,000 persons	7.29129	8.33174	1.90775	2.17258	3.11819	5.51054	4.42563	3.37958	34.0214	4.25284	4.74479	1.38464	3.60396	2.97379	2.96929	1.52345	3.36778	2.63516	3.39243	3.19957	2.22742	2.74482	2.4379	2.04826	3.0809	2.38441	3.31534	5.96685	6.34228	4.06468	7.62808	8.7907	1.95854	2.9437	3.1748	5.60524	4.5134	3.75621	33.3994	4.51656	5.01406	1.48445	3.82799	3.01682	3.05726	1.56516	3.47971	2.68685	3.71238
Number of doctors per 10,000 persons	32.9272	23.9655	15.4112	19.8775	21.0847	21.6818	20.7699	17.051	24.7222	14.5418	17.9767	10.801	12.5358	11.5289	15.2063	11.848	15.6755	14.5547	12.837	11.7088	14.2645	13.3385	13.8452	10.9727	12.5476	16.214	13.5875	15.6133	17.7617	20.61	33.3934	23.5033	15.3792	20.1911	21.03	22.0841	21.6893	16.9749	25.0749	15.1775	18.9807	11.3619	12.9429	11.8543	15.7257	12.2957	15.8351	13.8526	14.0317
Public finance expenditure per capita	0.688109	0.423893	0.142923	0.19933	0.285783	0.285327	0.232372	0.206227	0.925903	0.223866	0.258378	0.116514	0.16777	0.130817	0.158545	0.118981	0.136378	0.138068	0.248974	0.131219	0.18266	0.17418	0.13178	0.139605	0.172205	0.688109	0.423893	0.142923	0.19933	0.285783	0.820265	0.50523	0.171116	0.27128	0.338812	0.333118	0.263812	0.253342	0.989293	0.266656	0.295554	0.153884	0.204805	0.160506	0.196953	0.153331	0.183911	0.167852	0.274435
	5.42271	0.0426941	5.38001
	17107.4	51.9	17055.5
	77.3187	1.5	75.8187
	66.8	2.94	63.86
	16229.7	909.255	15320.5
	100.3	18.49	81.81
	0.0649562	8.22293e-05	0.064874
	100	13.1225	86.8775
	406	22.2	383.8
	123.831	95	28.8308
	164889	0.505196	164888
	2.88799	0.0476109	2.84038
	89.6	0.338034	89.262
	99.7	66.4	33.3
	21.05	0.777823	20.2722
	716.1	5.5	710.6
	0.0945249	0.0136492	0.0808757
	412.51	55.43	357.08
	709725	79	709646
	1.70854	0.00711348	1.70142
	3575956	446	3575510
	34.3229	1.38464	32.9383
	58.516	10.0673	48.4487
	3.4085	0.116514	3.29199
[truncated: 431 more columns]

## Sheet: standardization
region	Beijing	Tianjin	Hebei	Shanxi	Inner Mongolia	Liaoning	Jilin	Heilongjiang	Shanghai	Jiangsu	Zhejiang	Anhui	Fujian	Jiangxi	Shandong	Henan	Hubei	Hunan	Guangdong	Guangxi	Hainan	Chongqing	Sichuan	Guizhou	Yunnan	Shaanxi	Gansu	Qinghai	Ningxia	Xinjiang	北京	天津	河北	山西	内蒙古	辽宁	吉林	黑龙江	上海	江苏	浙江	安徽	福建	江西	山东	河南	湖北	湖南	广东
year	2005	2005	2005	2005	2005	2005	2005	2005	2005	2005	2005	2005	2005	2005	2005	2005	2005	2005	2005	2005	2005	2005	2005	2005	2005	2005	2005	2005	2005	2005	2006	2006	2006	2006	2006	2006	2006	2006	2006	2006	2006	2006	2006	2006	2006	2006	2006	2006	2006
Per capita cultivated land area	0.033626	0.0786032	0.178814	0.246281	0.630935	0.175903	0.37383	0.564914	0.0250051	0.117928	0.0727169	0.173433	0.067502	0.121128	0.14661	0.152777	0.153182	0.108213	0.0582177	0.167882	0.163144	0.129419	0.199601	0.236415	0.26029	0.248914	0.352109	0.227572	0.387762	0.360639	0.0324956	0.0760271	0.177541	0.244775	0.628003	0.173751	0.372848	0.564464	0.0243335	0.116678	0.0713889	0.17373	0.0670144	0.120295	0.145597	0.152572	0.153663	0.10792	0.0574356
Water resources per capita	0.00582257	0.00294987	0.00850746	0.0117035	0.109372	0.049509	0.118138	0.111536	0.00504908	0.0336959	0.118748	0.0660725	0.230049	0.202943	0.0234025	0.0319733	0.0931488	0.152303	0.108733	0.214119	0.215209	0.104101	0.20625	0.128551	0.240966	0.0745098	0.0580751	0.945443	0.00537672	0.278913	0.00525344	0.00255636	0.00610947	0.0123831	0.0977925	0.0330451	0.0731963	0.108639	0.00598048	0.0285187	0.104224	0.0526165	0.265357	0.217924	0.00955117	0.0170561	0.0627422	0.160828	0.137445
Proportion of nature reserve in the area under jurisdiction	0.0857308	0.170143	0.019784	0.0764983	0.138488	0.127937	0.143764	0.117385	0.175418	0.0844119	0.0145083	0.021103	0.0237408	0.0514385	0.0672657	0.0395681	0.0527574	0.0461628	0.040887	0.06199	0.0501196	0.122661	0.2229	0.0461628	0.121342	0.0435249	0.24796	0.362707	0.109472	0.159591	0.0838843	0.171462	0.02229	0.0754431	0.130575	0.124112	0.142973	0.137565	0.175287	0.0692441	0.0143764	0.0242684	0.0205754	0.0531531	0.0676614	0.0398319	0.052098	0.0490644	0.0414146
Forest coverage rate	0.286878	0.0814281	0.230974	0.162073	0.231131	0.470247	0.551049	0.573129	0.00360163	0.0720326	0.805982	0.330254	0.939868	0.828688	0.164422	0.207485	0.37316	0.590197	0.681961	0.602412	0.71923	0.30238	0.427967	0.327122	0.59239	0.463671	0.0582524	0.0228625	0.0491701	0	0.286878	0.0814281	0.230974	0.162073	0.231131	0.470247	0.551049	0.573129	0.00360163	0.0720326	0.805982	0.330254	0.939868	0.828688	0.164422	0.207485	0.37316	0.590197	0.681961
Electricity consumption per capita	0.817214	0.818512	0.916255	0.875239	0.876685	0.887616	0.968451	0.964371	0.720884	0.867816	0.84049	0.997259	0.919648	1	0.924428	0.965217	0.969167	0.989761	0.869541	0.987893	0.995015	0.978242	0.984428	0.974133	0.977612	0.968735	0.936182	0.81105	0.727644	0.958635	0.806859	0.796044	0.895191	0.847059	0.818382	0.871636	0.96048	0.957412	0.703267	0.837186	0.809109	0.988609	0.900325	0.992227	0.900038	0.953469	0.958826	0.980227	0.848601
Urban sewage treatment rate	0.630974	0.482459	0.431121	0.461313	0.398729	0.352524	0.111478	0.212566	0.639897	0.712382	0.500795	0.413764	0.440411	0.200831	0.505562	0.334433	0.356069	0.269649	0.32441	0.341279	0.56839	0.197531	0.295807	0.101821	0.528908	0.164405	0.275516	0	0.433199	0.625718	0.454468	0.675834	0.501039	0.551766	0.510084	0.410586	0.369881	0.145092	0.174551	0.689769	0.774111	0.526097	0.476714	0.492972	0.200953	0.619606	0.435032	0.440411	0.296174
Per capita sulfur dioxide emissions	0.810841	0.609624	0.664898	0.304743	0.0606339	0.56414	0.783898	0.796279	0.556518	0.718136	0.730617	0.857449	0.800247	0.782082	0.667576	0.73439	0.807439	0.777336	0.784318	0.662545	0.960311	0.540155	0.757248	0.440064	0.82045	0.61922	0.666712	0.64926	0.116744	0.603251	0.82967	0.635621	0.656017	0.326226	0	0.546881	0.769739	0.792408	0.569831	0.735036	0.735383	0.853934	0.79808	0.776036	0.676386	0.734731	0.795488	0.774255	0.791356
Harmless treatment rate of domestic waste	0.953411	0.775832	0.375886	0	0.34016	0.424927	0.311435	0.22037	0.260227	0.8032	0.797431	0.0515103	0.83798	0.411417	0.51941	0.515152	0.551662	0.30582	0.431333	0.555439	0.643488	0.47951	0.438676	0.5148	0.795531	0.306795	0.0472372	1	0.428537	0.262239	0.913441	0.827343	0.384651	0.114616	0.404679	0.47144	0.0539555	0.117608	0.515525	0.813185	0.842537	0.210498	0.517597	0.432419	0.655952	0.381658	0.249863	0.382004	0.491008
Green coverage rate of built-up area	0.0351746	0.0369984	0.0333507	0.0208442	0.00286608	0.037259	0.0239708	0.0109432	0.0145909	0.0458572	0.0302241	0.0138093	0.0362168	0.0270974	0.0385618	0.0263158	0.032569	0.0284002	0.0294424	0.019802	0.0270974	0	0.0184992	0.0135487	0.00625326	0.0208442	0.0109432	0.00468994	0.00182387	0.025013	0.0577124	0.0385618	0.0348359	0.0252215	0.0114122	0.0383794	0.0245961	0.0168577	0.0394216	0.0508598	0.0347316	0.0270453	0.0374674	0.0322043	0.0397342	0.0275925	0.0388484	0.0326733	0.0410631
GDP index	0.583769	0.683378	0.639201	0.610458	1	0.60063	0.593115	0.576032	0.55843	0.675674	0.616862	0.575738	0.577087	0.618553	0.702198	0.666693	0.593115	0.575773	0.652095	0.630606	0.528733	0.572304	0.610828	0.575773	0.485591	0.610458	0.584335	0.595552	0.552872	0.551493	0.617395	0.676359	0.638206	0.58271	0.822037	0.65208	0.693702	0.593115	0.589647	0.690233	0.655548	0.617395	0.686765	0.600052	0.686765	0.672891	0.631269	0.596584	0.679828
GDP per capita	2.44964e-05	1.86376e-05	5.90114e-06	4.51398e-06	6.84029e-06	8.44889e-06	5.0313e-06	5.68996e-06	2.81536e-05	1.1831e-05	1.3737e-05	2.19735e-06	8.24429e-06	2.66122e-06	9.12404e-06	3.81745e-06	3.8687e-06	3.2592e-06	1.17553e-05	2.26563e-06	3.52908e-06	3.59639e-06	2.43076e-06	0	1.68783e-06	2.93959e-06	1.47043e-06	3.02797e-06	3.14579e-06	4.88575e-06	2.75429e-05	2.19003e-05	7.22309e-06	5.50132e-06	9.09769e-06	1.01499e-05	6.46985e-06	6.75792e-06	3.19264e-05	1.4411e-05	1.62668e-05	3.0342e-06	9.95766e-06	3.4848e-06	1.13665e-05	5.01008e-06	4.99977e-06	4.18346e-06	1.41187e-05
Public budget revenue per capita	0.193656	0.0952544	0.00973922	0.021891	0.0241777	0.0395614	0.0100902	0.0125649	0.2639	0.0455347	0.0599043	0.00245287	0.0263224	0.00389332	0.0240911	0.00341787	0.00639167	0.00523584	0.0524411	0.00462137	0.0124407	0.0155513	0.00380203	0.000463231	0.00797335	0.00929434	0	0.0051672	0.0114277	0.0148219	0.232011	0.119822	0.0149092	0.0440931	0.0336723	0.0506399	0.0149412	0.0188629	0.288958	0.060491	0.0750156	0.00790126	0.0367869	0.0080278	0.0345312	0.00869707	0.0126797	0.0097692	0.0657092
Urbanization rate	0.933006	0.837669	0.418453	0.46797	0.524994	0.653828	0.584594	0.591091	0.994286	0.557594	0.623804	0.393919	0.526114	0.410723	0.500347	0.339584	0.480182	0.410723	0.67601	0.372857	0.502588	0.502588	0.365911	0.297237	0.326701	0.4133	0.332526	0.43593	0.469875	0.412404	0.94096	0.844615	0.426856	0.478053	0.541126	0.657077	0.589635	0.595572	0.989917	0.577648	0.629181	0.411844	0.533956	0.429544	0.51267	0.359974	0.486904	0.42988	0.702001
The proportion of output value of secondary and tertiary industries in GDP	0.966967	0.918919	0.561562	0.81982	0.555556	0.678679	0.489489	0.636637	0.981982	0.768769	0.810811	0.468468	0.624625	0.471471	0.690691	0.471471	0.510511	0.42042	0.816817	0.336336	0	0.555556	0.405405	0.45045	0.429429	0.651652	0.531532	0.648649	0.651652	0.42042	0.96997	0.927928	0.594595	0.834835	0.600601	0.690691	0.537538	0.651652	0.981982	0.795796	0.831832	0.507508	0.654655	0.504505	0.717718	0.516517	0.558559	0.48048	0.828829
Parkland area per capita	0.326134	0.215539	0.0359155	0.0413007	0.0646895	0.141448	0.0958951	0.0963495	0.293894	0.131144	0.0939926	0.0215165	0.0434319	0.0260925	0.10821	0.0281231	0.0792614	0.017332	0.175924	0.0183882	0.0629473	0.036621	0.0288949	0	0.00928485	0.0150251	0.0284661	0.012683	0.07623	0.0431569	0.488461	0.286707	0.349848	0.28868	0.424827	0.352808	0.323704	0.321237	0.32321	0.435186	0.306439	0.320744	0.332089	0.343435	0.591558	0.352808	0.373032	0.306439	0.417921
Consumption of chemical fertilizers	0.986856	0.974965	0.580791	0.873065	0.843484	0.839066	0.813397	0.795356	0.987419	0.528131	0.875077	0.605728	0.836026	0.825654	0.349662	0.278586	0.605502	0.712402	0.719786	0.724529	0.955235	0.896496	0.696841	0.898805	0.806994	0.80045	0.900901	0.997903	0.965621	0.856079	0.986856	0.973178	0.57868	0.869448	0.826893	0.837349	0.801295	0.779482	0.987292	0.526442	0.875486	0.593597	0.837658	0.821165	0.318435	0.247214	0.596144	0.705573	0.709218
The proportion of science, technology and education in GDP	0.121421	0.0653165	0.0443986	0.139443	0.0869593	0.0578833	0.0937346	0.0778493	0.0998367	0.0110311	0.0540108	0.107274	0.0499376	0.105943	0.00244063	0.0550108	0.0614947	0.0697659	0.0220739	0.162918	0.173309	0.0798765	0.07471	0.433614	0.282404	0.173405	0.27541	0.304458	0.244771	0.187393	0.136802	0.0720189	0.0364499	0.15219	0.0819808	0.0615018	0.104616	0.106044	0.100473	0.00764822	0.0526048	0.14379	0.0609637	0.112953	0	0.0674232	0.0732481	0.0686201	0.0245927
Number of students in higher education per 10,000 persons	0.843094	0.735	0.16116	0.18453	0.115782	0.282226	0.2647	0.241285	0.54193	0.279283	0.217161	0.114327	0.167198	0.264476	0.199458	0.099101	0.341434	0.178941	0.111198	0.0480513	0.081471	0.178629	0.109211	0	0.0050493	0.346857	0.0924934	0.0136904	0.0733658	0.0980863	0.846956	0.775787	0.194979	0.215203	0.14026	0.317231	0.292215	0.278431	0.564306	0.329265	0.249585	0.148965	0.207889	0.342083	0.247325	0.135223	0.382078	0.211359	0.148349
Number of patent applications granted	0.0141211	0.00417955	0.00494049	0.00160784	0.00107941	0.00861838	0.00273939	0.00398368	0.0176482	0.019025	0.0267415	0.00262103	0.00714159	0.00180653	0.0150272	0.00517018	0.00532801	0.00504477	0.051878	0.00161489	0.000170508	0.00494895	0.00637924	0.00119214	0.00183472	0.00255761	0.000659484	0	0.000190236	0.00118651	0.0157247	0.00574935	0.00570989	0.00189108	0.00126683	0.010315	0.0031565	0.00499263	0.0232834	0.0271586	0.0435273	0.00303813	0.00892417	0.00205314	0.0223464	0.00727546	0.00655961	0.00779121	0.0612094
Openness to the outside world	0.36977	0.707169	0.0879891	0.100568	0.0613749	0.278583	0.0937221	0.087273	0.950439	0.623038	0.439417	0.0787963	0.412121	0.0546757	0.22753	0.0370457	0.0696086	0.0472802	0.941206	0.0638942	0.109912	0.0621596	0.0458523	0.0454348	0.0650718	0.0763668	0.0701781	0.0392608	0.0896444	0.149328	0.415288	0.719004	0.0901542	0.0910693	0.055594	0.261325	0.0911836	0.102356	0.995742	0.643134	0.472244	0.089167	0.395089	0.0685696	0.230616	0.0369968	0.0706808	0.0452084	0.964614
FDI (Foreign Direct Investment)	0.0985012	0.0929767	0.0533658	0.00757095	0.0390325	0.100292	0.032067	0.0424435	0.191456	0.368589	0.215864	0.0191299	0.0728089	0.0676301	0.307927	0.0342648	0.0609784	0.0651261	0.424251	0.0104656	0.0196517	0.0195712	0.0306977	0.00534805	0.00805507	0.0174501	0.000446929	0.00731476	0.00382071	0.00120346	0.127183	0.115405	0.0562124	0.0130759	0.054934	0.167279	0.0460304	0.0487916	0.198644	0.487397	0.248493	0.0388498	0.0899455	0.0783695	0.285419	0.0514836	0.0683558	0.0724062	0.497924
Public library collections per 10,000 persons	0.179325	0.210913	0.0158815	0.0239217	0.0526303	0.125262	0.0923238	0.0605661	0.990846	0.0870782	0.102014	0	0.0673782	0.0482463	0.0481097	0.00421436	0.0602077	0.0379655	0.0609562	0.055101	0.0255865	0.0412948	0.0319767	0.0201473	0.0514981	0.0303528	0.0586158	0.139115	0.150513	0.0813655	0.18955	0.224847	0.0174235	0.0473329	0.054349	0.128137	0.0949888	0.0720005	0.971964	0.0950845	0.110188	0.00303025	0.0741798	0.0495528	0.0507803	0.0054806	0.063606	0.0395349	0.0706698
Number of doctors per 10,000 persons	0.471837	0.286865	0.110301	0.202487	0.227403	0.239729	0.220906	0.144148	0.302483	0.0923565	0.163255	0.0151444	0.0509515	0.0301686	0.106072	0.0367548	0.115756	0.0926225	0.0571678	0.0338821	0.0866326	0.0675189	0.0779788	0.0186879	0.0511962	0.126871	0.0726595	0.114472	0.158817	0.217605	0.481461	0.277324	0.109641	0.20896	0.226276	0.248031	0.239884	0.142576	0.309764	0.105477	0.183977	0.0267213	0.0593554	0.0368863	0.116794	0.0459955	0.11905	0.0781304	0.0818278
Public finance expenditure per capita	0.173632	0.0933721	0.00802224	0.0251569	0.0514185	0.05128	0.0351939	0.0272519	0.245867	0.0326102	0.0430938	0	0.01557	0.00434494	0.0127679	0.000749495	0.00603403	0.00654753	0.0402373	0.00446703	0.020093	0.0175171	0.00463742	0.00701438	0.0169172	0.173632	0.0933721	0.00802224	0.0251569	0.0514185	0.213777	0.11808	0.0165865	0.0470131	0.0675272	0.0657975	0.0447444	0.041564	0.265122	0.0456084	0.0543868	0.011352	0.0268202	0.0133635	0.0244351	0.011184	0.0204731	0.015595	0.0479714
[truncated: 431 more columns]

## Sheet: Zero value processing
region	Beijing	Tianjin	Hebei	Shanxi	Inner Mongolia	Liaoning	Jilin	Heilongjiang	Shanghai	Jiangsu	Zhejiang	Anhui	Fujian	Jiangxi	Shandong	Henan	Hubei	Hunan	Guangdong	Guangxi	Hainan	Chongqing	Sichuan	Guizhou	Yunnan	Shaanxi	Gansu	Qinghai	Ningxia	Xinjiang	北京	天津	河北	山西	内蒙古	辽宁	吉林	黑龙江	上海	江苏	浙江	安徽	福建	江西	山东	河南	湖北	湖南	广东
year	2005	2005	2005	2005	2005	2005	2005	2005	2005	2005	2005	2005	2005	2005	2005	2005	2005	2005	2005	2005	2005	2005	2005	2005	2005	2005	2005	2005	2005	2005	2006	2006	2006	2006	2006	2006	2006	2006	2006	2006	2006	2006	2006	2006	2006	2006	2006	2006	2006
Per capita cultivated land area	0.033626	0.0786032	0.178814	0.246281	0.630935	0.175903	0.37383	0.564914	0.0250051	0.117928	0.0727169	0.173433	0.067502	0.121128	0.14661	0.152777	0.153182	0.108213	0.0582177	0.167882	0.163144	0.129419	0.199601	0.236415	0.26029	0.248914	0.352109	0.227572	0.387762	0.360639	0.0324956	0.0760271	0.177541	0.244775	0.628003	0.173751	0.372848	0.564464	0.0243335	0.116678	0.0713889	0.17373	0.0670144	0.120295	0.145597	0.152572	0.153663	0.10792	0.0574356
Water resources per capita	0.00582257	0.00294987	0.00850746	0.0117035	0.109372	0.049509	0.118138	0.111536	0.00504909	0.0336959	0.118748	0.0660725	0.230049	0.202943	0.0234025	0.0319733	0.0931488	0.152303	0.108733	0.214119	0.215209	0.104101	0.20625	0.128551	0.240966	0.0745098	0.0580751	0.945443	0.00537672	0.278913	0.00525344	0.00255636	0.00610947	0.0123831	0.0977925	0.0330451	0.0731963	0.108639	0.00598048	0.0285187	0.104224	0.0526165	0.265357	0.217924	0.00955117	0.0170561	0.0627422	0.160828	0.137445
Proportion of nature reserve in the area under jurisdiction	0.0857308	0.170143	0.019784	0.0764983	0.138488	0.127937	0.143764	0.117385	0.175418	0.0844119	0.0145083	0.021103	0.0237408	0.0514385	0.0672657	0.0395681	0.0527574	0.0461628	0.040887	0.06199	0.0501196	0.122661	0.2229	0.0461628	0.121342	0.0435249	0.24796	0.362707	0.109472	0.159591	0.0838843	0.171462	0.02229	0.0754431	0.130575	0.124112	0.142973	0.137565	0.175287	0.0692441	0.0143764	0.0242684	0.0205754	0.0531531	0.0676614	0.0398319	0.052098	0.0490644	0.0414146
Forest coverage rate	0.286878	0.0814281	0.230974	0.162073	0.231131	0.470247	0.551049	0.573129	0.00360163	0.0720326	0.805982	0.330254	0.939868	0.828688	0.164422	0.207485	0.37316	0.590197	0.681961	0.602412	0.71923	0.30238	0.427967	0.327122	0.59239	0.463671	0.0582524	0.0228625	0.0491701	1e-09	0.286878	0.0814281	0.230974	0.162073	0.231131	0.470247	0.551049	0.573129	0.00360163	0.0720326	0.805982	0.330254	0.939868	0.828688	0.164422	0.207485	0.37316	0.590197	0.681961
Electricity consumption per capita	0.817214	0.818512	0.916255	0.875239	0.876685	0.887616	0.968451	0.964371	0.720884	0.867816	0.84049	0.997259	0.919648	1	0.924428	0.965217	0.969167	0.989761	0.869541	0.987893	0.995015	0.978242	0.984428	0.974133	0.977612	0.968735	0.936182	0.81105	0.727644	0.958635	0.806859	0.796044	0.895191	0.847059	0.818382	0.871636	0.96048	0.957412	0.703267	0.837186	0.809109	0.988609	0.900325	0.992227	0.900038	0.953469	0.958826	0.980227	0.848601
Urban sewage treatment rate	0.630974	0.482459	0.431121	0.461313	0.398729	0.352524	0.111478	0.212566	0.639897	0.712382	0.500795	0.413764	0.440411	0.200831	0.505562	0.334433	0.356069	0.269649	0.32441	0.341279	0.56839	0.197531	0.295807	0.101821	0.528908	0.164405	0.275516	1e-09	0.433199	0.625718	0.454468	0.675834	0.501039	0.551766	0.510084	0.410586	0.369881	0.145092	0.174551	0.689769	0.774111	0.526097	0.476714	0.492972	0.200953	0.619606	0.435032	0.440411	0.296174
Per capita sulfur dioxide emissions	0.810841	0.609624	0.664898	0.304743	0.0606339	0.56414	0.783898	0.796279	0.556518	0.718136	0.730617	0.857449	0.800247	0.782082	0.667576	0.73439	0.807439	0.777336	0.784318	0.662545	0.960311	0.540155	0.757248	0.440064	0.82045	0.61922	0.666712	0.64926	0.116744	0.603251	0.82967	0.635621	0.656017	0.326226	1e-09	0.546881	0.769739	0.792408	0.569831	0.735036	0.735383	0.853934	0.79808	0.776036	0.676386	0.734731	0.795488	0.774255	0.791356
Harmless treatment rate of domestic waste	0.953411	0.775832	0.375886	1e-09	0.34016	0.424927	0.311435	0.22037	0.260227	0.8032	0.797431	0.0515103	0.83798	0.411417	0.51941	0.515152	0.551662	0.30582	0.431333	0.555439	0.643488	0.47951	0.438676	0.5148	0.795531	0.306795	0.0472372	1	0.428537	0.262239	0.913441	0.827343	0.384651	0.114616	0.404679	0.47144	0.0539555	0.117608	0.515525	0.813185	0.842537	0.210498	0.517597	0.432419	0.655952	0.381658	0.249863	0.382004	0.491008
Green coverage rate of built-up area	0.0351746	0.0369984	0.0333507	0.0208442	0.00286608	0.037259	0.0239708	0.0109432	0.0145909	0.0458572	0.0302241	0.0138093	0.0362168	0.0270974	0.0385618	0.0263158	0.032569	0.0284002	0.0294424	0.019802	0.0270974	1e-09	0.0184992	0.0135487	0.00625326	0.0208442	0.0109432	0.00468994	0.00182387	0.025013	0.0577124	0.0385618	0.0348359	0.0252215	0.0114122	0.0383794	0.0245961	0.0168577	0.0394216	0.0508598	0.0347316	0.0270453	0.0374674	0.0322043	0.0397342	0.0275925	0.0388484	0.0326733	0.0410631
GDP index	0.583769	0.683378	0.639201	0.610458	1	0.60063	0.593115	0.576032	0.55843	0.675674	0.616862	0.575738	0.577087	0.618553	0.702198	0.666693	0.593115	0.575773	0.652095	0.630606	0.528733	0.572304	0.610828	0.575773	0.485591	0.610458	0.584335	0.595552	0.552872	0.551493	0.617395	0.676359	0.638206	0.58271	0.822037	0.65208	0.693702	0.593115	0.589647	0.690233	0.655548	0.617395	0.686765	0.600052	0.686765	0.672891	0.631269	0.596584	0.679828
GDP per capita	2.44974e-05	1.86386e-05	5.90214e-06	4.51498e-06	6.84129e-06	8.44989e-06	5.0323e-06	5.69096e-06	2.81546e-05	1.1832e-05	1.3738e-05	2.19835e-06	8.24529e-06	2.66222e-06	9.12504e-06	3.81845e-06	3.8697e-06	3.2602e-06	1.17563e-05	2.26663e-06	3.53008e-06	3.59739e-06	2.43176e-06	1e-09	1.68883e-06	2.94059e-06	1.47143e-06	3.02897e-06	3.14679e-06	4.88675e-06	2.75439e-05	2.19013e-05	7.22409e-06	5.50232e-06	9.09869e-06	1.01509e-05	6.47085e-06	6.75892e-06	3.19274e-05	1.4412e-05	1.62678e-05	3.0352e-06	9.95866e-06	3.4858e-06	1.13675e-05	5.01108e-06	5.00077e-06	4.18446e-06	1.41197e-05
Public budget revenue per capita	0.193656	0.0952544	0.00973922	0.021891	0.0241777	0.0395614	0.0100902	0.0125649	0.2639	0.0455347	0.0599043	0.00245287	0.0263224	0.00389332	0.0240911	0.00341787	0.00639167	0.00523584	0.0524411	0.00462137	0.0124407	0.0155513	0.00380203	0.000463232	0.00797335	0.00929434	1e-09	0.0051672	0.0114277	0.0148219	0.232011	0.119822	0.0149092	0.0440931	0.0336723	0.0506399	0.0149412	0.0188629	0.288958	0.060491	0.0750156	0.00790126	0.0367869	0.0080278	0.0345312	0.00869707	0.0126797	0.0097692	0.0657092
Urbanization rate	0.933006	0.837669	0.418453	0.46797	0.524994	0.653828	0.584594	0.591091	0.994286	0.557594	0.623804	0.393919	0.526114	0.410723	0.500347	0.339584	0.480182	0.410723	0.67601	0.372857	0.502588	0.502588	0.365911	0.297237	0.326701	0.4133	0.332526	0.43593	0.469875	0.412404	0.94096	0.844615	0.426856	0.478053	0.541126	0.657077	0.589635	0.595572	0.989917	0.577648	0.629181	0.411844	0.533956	0.429544	0.51267	0.359974	0.486904	0.42988	0.702001
The proportion of output value of secondary and tertiary industries in GDP	0.966967	0.918919	0.561562	0.81982	0.555556	0.678679	0.489489	0.636637	0.981982	0.768769	0.810811	0.468468	0.624625	0.471471	0.690691	0.471471	0.510511	0.42042	0.816817	0.336336	1e-09	0.555556	0.405405	0.45045	0.429429	0.651652	0.531532	0.648649	0.651652	0.42042	0.96997	0.927928	0.594595	0.834835	0.600601	0.690691	0.537538	0.651652	0.981982	0.795796	0.831832	0.507508	0.654655	0.504505	0.717718	0.516517	0.558559	0.48048	0.828829
Parkland area per capita	0.326134	0.215539	0.0359155	0.0413007	0.0646895	0.141448	0.0958951	0.0963495	0.293894	0.131144	0.0939926	0.0215165	0.0434319	0.0260925	0.10821	0.0281231	0.0792614	0.017332	0.175924	0.0183882	0.0629473	0.036621	0.0288949	1e-09	0.00928485	0.0150251	0.0284661	0.012683	0.07623	0.0431569	0.488461	0.286707	0.349848	0.28868	0.424827	0.352808	0.323704	0.321237	0.32321	0.435186	0.306439	0.320744	0.332089	0.343435	0.591558	0.352808	0.373032	0.306439	0.417921
Consumption of chemical fertilizers	0.986856	0.974965	0.580791	0.873065	0.843484	0.839066	0.813397	0.795356	0.987419	0.528131	0.875077	0.605728	0.836026	0.825654	0.349662	0.278586	0.605502	0.712402	0.719786	0.724529	0.955235	0.896496	0.696841	0.898805	0.806994	0.80045	0.900901	0.997903	0.965621	0.856079	0.986856	0.973178	0.57868	0.869448	0.826893	0.837349	0.801295	0.779482	0.987292	0.526442	0.875486	0.593597	0.837658	0.821165	0.318435	0.247214	0.596144	0.705573	0.709218
The proportion of science, technology and education in GDP	0.121421	0.0653165	0.0443986	0.139443	0.0869593	0.0578833	0.0937346	0.0778493	0.0998367	0.0110311	0.0540108	0.107274	0.0499376	0.105943	0.00244063	0.0550108	0.0614947	0.0697659	0.0220739	0.162918	0.173309	0.0798765	0.07471	0.433614	0.282404	0.173405	0.27541	0.304458	0.244771	0.187393	0.136802	0.0720189	0.0364499	0.15219	0.0819808	0.0615018	0.104616	0.106044	0.100473	0.00764823	0.0526048	0.14379	0.0609637	0.112953	1e-09	0.0674232	0.0732481	0.0686201	0.0245927
Number of students in higher education per 10,000 persons	0.843094	0.735	0.16116	0.18453	0.115782	0.282226	0.2647	0.241285	0.54193	0.279283	0.217161	0.114327	0.167198	0.264476	0.199458	0.099101	0.341434	0.178941	0.111198	0.0480513	0.081471	0.178629	0.109211	1e-09	0.0050493	0.346857	0.0924934	0.0136904	0.0733658	0.0980863	0.846956	0.775787	0.194979	0.215203	0.14026	0.317231	0.292215	0.278431	0.564306	0.329265	0.249585	0.148965	0.207889	0.342083	0.247325	0.135223	0.382078	0.211359	0.148349
Number of patent applications granted	0.0141211	0.00417955	0.00494049	0.00160784	0.00107941	0.00861838	0.0027394	0.00398368	0.0176482	0.019025	0.0267415	0.00262103	0.00714159	0.00180654	0.0150272	0.00517018	0.00532801	0.00504477	0.051878	0.00161489	0.000170509	0.00494895	0.00637924	0.00119214	0.00183472	0.00255761	0.000659485	1e-09	0.000190237	0.00118651	0.0157247	0.00574935	0.00570989	0.00189108	0.00126683	0.010315	0.0031565	0.00499263	0.0232834	0.0271586	0.0435273	0.00303814	0.00892417	0.00205314	0.0223464	0.00727546	0.00655961	0.00779121	0.0612094
Openness to the outside world	0.36977	0.707169	0.0879891	0.100568	0.0613749	0.278583	0.0937221	0.087273	0.950439	0.623038	0.439417	0.0787963	0.412121	0.0546757	0.22753	0.0370457	0.0696086	0.0472802	0.941206	0.0638942	0.109912	0.0621596	0.0458523	0.0454348	0.0650718	0.0763668	0.0701781	0.0392608	0.0896444	0.149328	0.415288	0.719004	0.0901542	0.0910693	0.055594	0.261325	0.0911836	0.102356	0.995742	0.643134	0.472244	0.089167	0.395089	0.0685696	0.230616	0.0369968	0.0706808	0.0452084	0.964614
FDI (Foreign Direct Investment)	0.0985012	0.0929767	0.0533658	0.00757095	0.0390325	0.100292	0.032067	0.0424435	0.191456	0.368589	0.215864	0.0191299	0.0728089	0.0676301	0.307927	0.0342648	0.0609784	0.0651261	0.424251	0.0104656	0.0196517	0.0195712	0.0306977	0.00534805	0.00805508	0.0174501	0.00044693	0.00731476	0.00382071	0.00120347	0.127183	0.115405	0.0562124	0.0130759	0.054934	0.167279	0.0460304	0.0487916	0.198644	0.487397	0.248493	0.0388498	0.0899455	0.0783695	0.285419	0.0514836	0.0683558	0.0724062	0.497924
Public library collections per 10,000 persons	0.179325	0.210913	0.0158815	0.0239217	0.0526303	0.125262	0.0923238	0.0605661	0.990846	0.0870782	0.102014	1e-09	0.0673782	0.0482463	0.0481097	0.00421436	0.0602077	0.0379655	0.0609562	0.055101	0.0255865	0.0412948	0.0319767	0.0201473	0.0514981	0.0303528	0.0586158	0.139115	0.150513	0.0813655	0.18955	0.224847	0.0174235	0.0473329	0.054349	0.128137	0.0949888	0.0720005	0.971964	0.0950845	0.110188	0.00303025	0.0741798	0.0495528	0.0507803	0.0054806	0.063606	0.0395349	0.0706698
Number of doctors per 10,000 persons	0.471837	0.286865	0.110301	0.202487	0.227403	0.239729	0.220906	0.144148	0.302483	0.0923565	0.163255	0.0151444	0.0509515	0.0301686	0.106072	0.0367548	0.115756	0.0926225	0.0571678	0.0338821	0.0866326	0.0675189	0.0779788	0.0186879	0.0511962	0.126871	0.0726595	0.114472	0.158817	0.217605	0.481461	0.277324	0.109641	0.20896	0.226276	0.248031	0.239884	0.142576	0.309764	0.105477	0.183977	0.0267213	0.0593554	0.0368863	0.116794	0.0459955	0.11905	0.0781304	0.0818278
Public finance expenditure per capita	0.173632	0.0933721	0.00802224	0.0251569	0.0514185	0.05128	0.0351939	0.0272519	0.245867	0.0326102	0.0430938	1e-09	0.01557	0.00434494	0.0127679	0.000749496	0.00603404	0.00654753	0.0402373	0.00446703	0.020093	0.0175171	0.00463743	0.00701438	0.0169172	0.173632	0.0933721	0.00802224	0.0251569	0.0514185	0.213777	0.11808	0.0165865	0.0470131	0.0675272	0.0657975	0.0447444	0.041564	0.265122	0.0456084	0.0543868	0.011352	0.0268202	0.0133635	0.0244351	0.011184	0.0204731	0.015595	0.0479714
[truncated: 431 more columns]

## Sheet: P
region	Beijing	Tianjin	Hebei	Shanxi	Inner Mongolia	Liaoning	Jilin	Heilongjiang	Shanghai	Jiangsu	Zhejiang	Anhui	Fujian	Jiangxi	Shandong	Henan	Hubei	Hunan	Guangdong	Guangxi	Hainan	Chongqing	Sichuan	Guizhou	Yunnan	Shaanxi	Gansu	Qinghai	Ningxia	Xinjiang	北京	天津	河北	山西	内蒙古	辽宁	吉林	黑龙江	上海	江苏	浙江	安徽	福建	江西	山东	河南	湖北	湖南	广东
year	2005	2005	2005	2005	2005	2005	2005	2005	2005	2005	2005	2005	2005	2005	2005	2005	2005	2005	2005	2005	2005	2005	2005	2005	2005	2005	2005	2005	2005	2005	2006	2006	2006	2006	2006	2006	2006	2006	2006	2006	2006	2006	2006	2006	2006	2006	2006	2006	2006
Per capita cultivated land area	0.000340986	0.00079708	0.00181327	0.00249743	0.00639803	0.00178375	0.00379084	0.00572854	0.000253565	0.00119586	0.000737389	0.00175871	0.000684508	0.0012283	0.0014867	0.00154925	0.00155335	0.00109734	0.00059036	0.00170242	0.00165437	0.00131238	0.00202406	0.00239738	0.00263948	0.00252413	0.00357058	0.00230771	0.00393212	0.00365708	0.000329523	0.000770957	0.00180037	0.00248215	0.0063683	0.00176193	0.00378089	0.00572398	0.000246756	0.00118318	0.000723923	0.00176172	0.000679563	0.00121986	0.00147643	0.00154716	0.00155822	0.00109437	0.000582429
Water resources per capita	9.81554e-05	4.97282e-05	0.000143417	0.000197295	0.00184377	0.00083461	0.00199154	0.00188024	8.51162e-05	0.000568037	0.00200182	0.00111383	0.00387811	0.00342117	0.000394513	0.000538997	0.00157028	0.00256748	0.001833	0.00360956	0.00362794	0.00175491	0.00347691	0.00216708	0.00406215	0.00125607	0.000979016	0.015938	9.06395e-05	0.00470185	8.85612e-05	4.30945e-05	0.000102992	0.000208751	0.00164856	0.000557065	0.00123393	0.00183142	0.000100817	0.000480761	0.00175699	0.000886995	0.00447333	0.00367371	0.000161011	0.000287527	0.00105769	0.0027112	0.00231702
Proportion of nature reserve in the area under jurisdiction	0.0017912	0.00355484	0.000413353	0.0015983	0.00289347	0.00267302	0.0030037	0.00245256	0.00366506	0.00176364	0.000303126	0.00044091	0.000496024	0.00107472	0.0014054	0.000826706	0.00110227	0.00096449	0.000854263	0.00129517	0.00104716	0.00256279	0.00465711	0.00096449	0.00253523	0.000909377	0.00518069	0.00757814	0.00228722	0.00333438	0.00175262	0.00358239	0.000465711	0.00157625	0.00272813	0.0025931	0.00298716	0.00287418	0.00366231	0.00144674	0.00030037	0.000507046	0.000429887	0.00111054	0.00141367	0.000832217	0.0010885	0.00102512	0.000865286
Forest coverage rate	0.0013482	0.000382676	0.00108547	0.000761672	0.00108621	0.00220995	0.00258968	0.00269345	1.6926e-05	0.000338521	0.00378775	0.00155204	0.00441696	0.00389446	0.000772711	0.000975087	0.00175368	0.00277366	0.00320491	0.00283106	0.00338006	0.00142105	0.00201126	0.00153733	0.00278397	0.00217904	0.00027376	0.000107444	0.000231077	4.69955e-12	0.0013482	0.000382676	0.00108547	0.000761672	0.00108621	0.00220995	0.00258968	0.00269345	1.6926e-05	0.000338521	0.00378775	0.00155204	0.00441696	0.00389446	0.000772711	0.000975087	0.00175368	0.00277366	0.00320491
Electricity consumption per capita	0.00216459	0.00216803	0.00242693	0.00231829	0.00232212	0.00235107	0.00256518	0.00255438	0.00190944	0.00229862	0.00222625	0.00264149	0.00243592	0.00264875	0.00244858	0.00255661	0.00256708	0.00262163	0.0023032	0.00261668	0.00263554	0.00259112	0.0026075	0.00258023	0.00258945	0.00256593	0.00247971	0.00214827	0.00192734	0.00253918	0.00213717	0.00210852	0.00237113	0.00224365	0.00216769	0.00230874	0.00254407	0.00253594	0.00186278	0.00221749	0.00214312	0.00261858	0.00238473	0.00262816	0.00238397	0.0025255	0.00253969	0.00259637	0.00224773
Urban sewage treatment rate	0.00173268	0.00132485	0.00118388	0.00126678	0.00109493	0.000968046	0.000306123	0.000583714	0.00175718	0.00195623	0.0013752	0.00113621	0.00120939	0.000551491	0.00138829	0.000918368	0.00097778	0.000740468	0.000890844	0.000937165	0.00156082	0.000542428	0.000812299	0.000279605	0.0014524	0.000451464	0.000756579	2.74604e-12	0.00118958	0.00171825	0.00124799	0.00185587	0.00137587	0.00151517	0.00140071	0.00112748	0.00101571	0.000398429	0.000479324	0.00189413	0.00212574	0.00144468	0.00130908	0.00135372	0.000551826	0.00170146	0.00119462	0.00120939	0.000813306
Per capita sulfur dioxide emissions	0.00222455	0.00167251	0.00182416	0.000836067	0.00016635	0.00154772	0.00215063	0.0021846	0.00152681	0.00197021	0.00200446	0.00235242	0.00219549	0.00214565	0.0018315	0.00201481	0.00221522	0.00213263	0.00215179	0.0018177	0.00263463	0.00148192	0.00207752	0.00120732	0.00225092	0.00169884	0.00182913	0.00178125	0.000320289	0.00165503	0.00227621	0.00174383	0.00179979	0.000895006	2.74351e-12	0.00150037	0.00211179	0.00217398	0.00156334	0.00201658	0.00201753	0.00234278	0.00218954	0.00212906	0.00185567	0.00201574	0.00218243	0.00212418	0.00217109
Harmless treatment rate of domestic waste	0.0024971	0.002032	0.000984492	2.61912e-12	0.000890922	0.00111294	0.000815686	0.000577177	0.000681566	0.00210368	0.00208857	0.000134912	0.00219477	0.00107755	0.0013604	0.00134925	0.00144487	0.00080098	0.00112971	0.00145476	0.00168537	0.0012559	0.00114895	0.00134832	0.00208359	0.000803534	0.00012372	0.00261912	0.00112239	0.000686835	0.00239241	0.00216691	0.00100745	0.000300192	0.0010599	0.00123476	0.000141316	0.000308031	0.00135022	0.00212983	0.00220671	0.000551319	0.00135565	0.00113256	0.00171802	0.000999609	0.000654423	0.00100051	0.00128601
Green coverage rate of built-up area	0.00171612	0.0018051	0.00162714	0.00101696	0.000139832	0.00181782	0.0011695	0.000533904	0.000711872	0.00223731	0.00147459	0.000673736	0.00176697	0.00132205	0.00188138	0.00128391	0.001589	0.00138561	0.00143646	0.000966112	0.00132205	4.87886e-11	0.000902552	0.000661024	0.000305088	0.00101696	0.000533904	0.000228816	8.8984e-05	0.00122035	0.00281571	0.00188138	0.00169959	0.00123052	0.000556786	0.00187248	0.00120001	0.000822466	0.00192333	0.00248138	0.00169451	0.00131951	0.00182799	0.0015712	0.00193858	0.0013462	0.00189536	0.00159408	0.00200341
GDP index	0.00235958	0.0027622	0.00258363	0.00246746	0.00404198	0.00242773	0.00239736	0.00232831	0.00225716	0.00273106	0.00249334	0.00232712	0.00233257	0.00250018	0.00283827	0.00269476	0.00239736	0.00232726	0.00263575	0.0025489	0.00213713	0.00231324	0.00246895	0.00232726	0.00196275	0.00246746	0.00236187	0.00240721	0.00223469	0.00222912	0.00249549	0.00273383	0.00257961	0.0023553	0.00332265	0.00263569	0.00280393	0.00239736	0.00238334	0.00278991	0.00264971	0.00249549	0.00277589	0.0024254	0.00277589	0.00271981	0.00255157	0.00241138	0.00274785
GDP per capita	2.84351e-07	2.16345e-07	6.85084e-08	5.24072e-08	7.94095e-08	9.80811e-08	5.84119e-08	6.60572e-08	3.26801e-07	1.37339e-07	1.59462e-07	2.55171e-08	9.57062e-08	3.09014e-08	1.05918e-07	4.43222e-08	4.49171e-08	3.78424e-08	1.36459e-07	2.63097e-08	4.09749e-08	4.17563e-08	2.82263e-08	1.16074e-11	1.96029e-08	3.41325e-08	1.70795e-08	3.51585e-08	3.6526e-08	5.67224e-08	3.19712e-07	2.54217e-07	8.38528e-08	6.38675e-08	1.05612e-07	1.17826e-07	7.51097e-08	7.84534e-08	3.70594e-07	1.67285e-07	1.88826e-07	3.52307e-08	1.15594e-07	4.04611e-08	1.31947e-07	5.81655e-08	5.80458e-08	4.85706e-08	1.63892e-07
Public budget revenue per capita	0.00252236	0.00124069	0.000126853	0.00028513	0.000314914	0.000515287	0.000131425	0.000163658	0.00343729	0.000593089	0.000780252	3.19486e-05	0.000342848	5.07104e-05	0.000313786	4.45177e-05	8.32514e-05	6.81967e-05	0.000683045	6.01934e-05	0.00016204	0.000202555	4.95214e-05	6.03359e-06	0.000103853	0.000121059	1.3025e-11	6.73027e-05	0.000148845	0.000193055	0.00302194	0.00156068	0.000194192	0.000574312	0.000438582	0.000659584	0.000194608	0.000245689	0.00376367	0.000787894	0.000977078	0.000102914	0.00047915	0.000104562	0.000449769	0.000113279	0.000165153	0.000127244	0.000855862
Urbanization rate	0.00339156	0.003045	0.00152112	0.00170111	0.0019084	0.00237672	0.00212505	0.00214867	0.00361432	0.00202691	0.00226758	0.00143193	0.00191247	0.00149302	0.00181881	0.00123442	0.0017455	0.00149302	0.00245736	0.00135537	0.00182695	0.00182695	0.00133012	0.00108048	0.00118759	0.00150238	0.00120876	0.00158464	0.00170804	0.00149912	0.00342048	0.00307025	0.00155166	0.00173777	0.00196704	0.00238853	0.00214338	0.00216496	0.00359844	0.0020998	0.00228713	0.00149709	0.00194098	0.00156143	0.0018636	0.00130854	0.00176994	0.00156265	0.00255184
The proportion of output value of secondary and tertiary industries in GDP	0.00292668	0.00278125	0.00169966	0.00248132	0.00168148	0.00205413	0.00148152	0.00192688	0.00297213	0.0023268	0.00245405	0.00141789	0.00189053	0.00142698	0.00209049	0.00142698	0.00154514	0.00127247	0.00247223	0.00101798	3.02666e-12	0.00168148	0.00122702	0.00136336	0.00129974	0.00197233	0.00160876	0.00196324	0.00197233	0.00127247	0.00293577	0.00280852	0.00179964	0.00252676	0.00181781	0.00209049	0.00162694	0.00197233	0.00297213	0.0024086	0.00251767	0.00153605	0.00198142	0.00152696	0.00217229	0.00156332	0.00169057	0.00145425	0.00250858
Parkland area per capita	0.00131459	0.000868804	0.000144769	0.000166476	0.000260753	0.000570155	0.000386537	0.000388369	0.00118464	0.000528619	0.000378869	8.67295e-05	0.000175067	0.000105175	0.000436176	0.000113359	0.000319489	6.98626e-05	0.000709122	7.41199e-05	0.00025373	0.000147613	0.00011647	4.03083e-12	3.74257e-05	6.05636e-05	0.000114742	5.11232e-05	0.00030727	0.000173958	0.00196891	0.00115567	0.00141018	0.00116362	0.00171241	0.00142211	0.0013048	0.00129485	0.00130281	0.00175416	0.0012352	0.00129287	0.0013386	0.00138433	0.00238447	0.00142211	0.00150363	0.0012352	0.00168457
Consumption of chemical fertilizers	0.00274814	0.00271503	0.00161736	0.00243127	0.00234889	0.00233659	0.00226511	0.00221487	0.00274971	0.00147071	0.00243687	0.0016868	0.00232812	0.00229924	0.000973721	0.000775791	0.00168617	0.00198386	0.00200442	0.00201763	0.00266009	0.00249651	0.00194053	0.00250294	0.00224727	0.00222905	0.00250878	0.00277891	0.00268901	0.00238396	0.00274814	0.00271005	0.00161148	0.00242119	0.00230269	0.0023318	0.0022314	0.00217066	0.00274936	0.00146601	0.00243801	0.00165302	0.00233267	0.00228674	0.000886761	0.000688427	0.00166011	0.00196484	0.00197499
The proportion of science, technology and education in GDP	0.000785365	0.000422475	0.000287175	0.000901935	0.000562463	0.000374396	0.000606286	0.000503539	0.000645756	7.13508e-05	0.000349348	0.000693862	0.000323002	0.00068525	1.57863e-05	0.000355816	0.000397755	0.000451254	0.000142777	0.00105378	0.00112098	0.000516651	0.000483233	0.00280467	0.00182662	0.0011216	0.00178139	0.00196927	0.00158321	0.00121208	0.00088485	0.000465827	0.000235762	0.000984386	0.000530262	0.000397801	0.000676667	0.000685907	0.000649873	4.94696e-05	0.000340254	0.000930052	0.00039432	0.000730594	6.46812e-12	0.000436101	0.000473777	0.000443843	0.000159069
Number of students in higher education per 10,000 persons	0.00490949	0.00428004	0.000938464	0.00107455	0.000674223	0.00164345	0.0015414	0.00140505	0.00315576	0.00162632	0.00126457	0.000665749	0.000973626	0.00154009	0.00116148	0.000577083	0.00198823	0.00104201	0.000647526	0.000279811	0.000474421	0.00104019	0.000635956	5.82318e-12	2.9403e-05	0.00201981	0.000538606	7.97217e-05	0.000427223	0.000571175	0.00493198	0.00451755	0.0011354	0.00125317	0.000816757	0.0018473	0.00170162	0.00162135	0.00328606	0.00191737	0.00145338	0.000867452	0.00121057	0.00199201	0.00144022	0.000787428	0.00222491	0.00123078	0.000863863
Number of patent applications granted	0.000507947	0.000150341	0.000177713	5.78353e-05	3.88272e-05	0.000310009	9.8538e-05	0.000143296	0.00063482	0.000684342	0.000961911	9.42802e-05	0.000256888	6.49824e-05	0.000540539	0.000185975	0.000191652	0.000181464	0.00186609	5.80888e-05	6.13331e-06	0.000178017	0.000229466	4.28823e-05	6.59961e-05	9.19992e-05	2.37221e-05	3.59707e-11	6.84295e-06	4.26795e-05	0.00056563	0.000206808	0.000205389	6.80236e-05	4.55688e-05	0.000371038	0.000113542	0.000179588	0.000837522	0.000976914	0.00156571	0.000109284	0.000321009	7.38528e-05	0.000803814	0.000261703	0.000235954	0.000280255	0.00220174
Openness to the outside world	0.0046329	0.00886022	0.00110243	0.00126003	0.000768974	0.00349041	0.00117426	0.00109345	0.0119082	0.00780613	0.00550552	0.000987249	0.00516352	0.000685039	0.00285075	0.000464151	0.000872136	0.00059238	0.0117925	0.000800539	0.0013771	0.000778807	0.00057449	0.000569259	0.000815293	0.00095681	0.000879271	0.000491904	0.00112317	0.00187095	0.0052032	0.00900849	0.00112955	0.00114102	0.000696545	0.00327417	0.00114245	0.00128243	0.0124758	0.00805792	0.00591681	0.00111718	0.00495012	0.000859118	0.00288942	0.000463537	0.00088557	0.000566422	0.0120858
FDI (Foreign Direct Investment)	0.00101273	0.000955927	0.000548674	7.78397e-05	0.000401307	0.00103114	0.000329693	0.000436377	0.00196843	0.0037896	0.00221938	0.000196681	0.000748575	0.00069533	0.00316591	0.000352289	0.000626942	0.000669585	0.00436188	0.000107601	0.000202047	0.000201219	0.000315615	5.49853e-05	8.28172e-05	0.000179411	4.59505e-06	7.52058e-05	3.92822e-05	1.23733e-05	0.00130762	0.00118652	0.00057794	0.000134438	0.000564797	0.00171986	0.000473255	0.000501645	0.00204233	0.00501111	0.00255485	0.00039943	0.000924763	0.000805746	0.0029345	0.000529322	0.000702792	0.000744435	0.00511935
Public library collections per 10,000 persons	0.00247604	0.00291219	0.000219286	0.0003303	0.000726697	0.00172956	0.00127477	0.000836271	0.0136812	0.00120234	0.00140856	1.38076e-11	0.00093033	0.000666164	0.000664279	5.81901e-05	0.000831322	0.000524211	0.000841657	0.000760812	0.000353288	0.000570181	0.00044152	0.000278186	0.000711065	0.000419099	0.000809343	0.00192084	0.00207822	0.00112346	0.00261723	0.00310459	0.000240576	0.000653553	0.000750429	0.00176926	0.00131157	0.000994154	0.0134205	0.00131289	0.00152144	4.18405e-05	0.00102424	0.000684205	0.000701154	7.56738e-05	0.000878246	0.000545881	0.00097578
Number of doctors per 10,000 persons	0.00413615	0.00251467	0.000966901	0.00177501	0.00199343	0.00210148	0.00193647	0.00126361	0.00265158	0.000809601	0.0014311	0.000132757	0.000446643	0.000264459	0.000929834	0.000322194	0.00101472	0.000811933	0.000501136	0.000297012	0.000759426	0.000591874	0.000683566	0.000163819	0.000448788	0.00111215	0.000636936	0.00100346	0.0013922	0.00190754	0.00422051	0.00243104	0.000961122	0.00183176	0.00198355	0.00217425	0.00210283	0.00124983	0.00271541	0.000924617	0.00161275	0.00023424	0.000520312	0.000323347	0.00102382	0.000403199	0.0010436	0.000684895	0.000717307
Public finance expenditure per capita	0.00139026	0.000747621	6.42333e-05	0.000201428	0.000411703	0.000410594	0.000281794	0.000218203	0.00196863	0.000261106	0.000345048	8.0069e-12	0.000124667	3.47895e-05	0.000102231	6.00114e-06	4.83139e-05	5.24254e-05	0.000322176	3.57671e-05	0.000160883	0.000140257	3.71314e-05	5.61634e-05	0.000135454	0.00139026	0.000747621	6.42333e-05	0.000201428	0.000411703	0.00171169	0.000945451	0.000132806	0.000376429	0.000540684	0.000526834	0.000358264	0.000332799	0.00212281	0.000365181	0.000435469	9.08944e-05	0.000214747	0.000107	0.000195649	8.95495e-05	0.000163926	0.000124867	0.000384102
[truncated: 431 more columns]

## Sheet: entropy
Per capita cultivated land area	-0.00272232	-0.00568681	-0.0114465	-0.0149658	-0.0323214	-0.0112894	-0.0211346	-0.0295724	-0.00209949	-0.00804681	-0.00531834	-0.0111558	-0.00498788	-0.00823224	-0.00968021	-0.0100236	-0.010046	-0.00747822	-0.00438919	-0.0108541	-0.0105951	-0.00870883	-0.0125545	-0.0144643	-0.0156711	-0.015099	-0.0201203	-0.0140112	-0.0217784	-0.0205202	-0.00264207	-0.00552613	-0.0113779	-0.0148895	-0.0322008	-0.011173	-0.021089	-0.0295534	-0.00204983	-0.0079741	-0.00523456	-0.0111719	-0.00495677	-0.00818405	-0.00962358	-0.0100122	-0.0100727	-0.00746094	-0.0043381
Water resources per capita	-0.000905872	-0.000492754	-0.0012692	-0.00168309	-0.0116083	-0.00591617	-0.0123851	-0.0118011	-0.000797666	-0.00424512	-0.0124387	-0.00757401	-0.0215328	-0.0194246	-0.00309214	-0.00405639	-0.0101385	-0.0153146	-0.0115512	-0.0203008	-0.0203857	-0.0111355	-0.0196849	-0.0132937	-0.0223664	-0.00839024	-0.00678356	-0.0659683	-0.000843728	-0.025201	-0.000826437	-0.000433191	-0.000945554	-0.00176903	-0.0105637	-0.004174	-0.00826428	-0.0115428	-0.000927742	-0.00367308	-0.0111466	-0.00623351	-0.024199	-0.0205968	-0.00140628	-0.00234455	-0.00724696	-0.0160242	-0.0140585
Proportion of nature reserve in the area under jurisdiction	-0.0113291	-0.0200473	-0.00322052	-0.0102911	-0.0169132	-0.0158364	-0.0174452	-0.0147414	-0.020557	-0.0111821	-0.00245573	-0.00340677	-0.00377419	-0.00734645	-0.00922987	-0.00586801	-0.00750691	-0.00669734	-0.0060356	-0.00861175	-0.00718528	-0.0152913	-0.0250057	-0.00669734	-0.0151543	-0.00636814	-0.027265	-0.0370002	-0.0139073	-0.0190175	-0.0111232	-0.0201751	-0.00357291	-0.0101711	-0.0161073	-0.0154417	-0.0173657	-0.0168197	-0.0205443	-0.0094594	-0.00243615	-0.00384691	-0.00333248	-0.00755491	-0.00927587	-0.0059016	-0.00742677	-0.00705582	-0.00610239
Forest coverage rate	-0.00891021	-0.00301102	-0.00740916	-0.0054688	-0.00741345	-0.0135134	-0.0154247	-0.015937	-0.000185961	-0.00270509	-0.0211204	-0.0100389	-0.0239501	-0.0216072	-0.00553694	-0.00676026	-0.0111289	-0.0163302	-0.018406	-0.0166101	-0.0192321	-0.00931692	-0.0124879	-0.00995835	-0.0163805	-0.0133551	-0.00224573	-0.000981878	-0.00193475	-1.22581e-10	-0.00891021	-0.00301102	-0.00740916	-0.0054688	-0.00741345	-0.0135134	-0.0154247	-0.015937	-0.000185961	-0.00270509	-0.0211204	-0.0100389	-0.0239501	-0.0216072	-0.00553694	-0.00676026	-0.0111289	-0.0163302	-0.018406
Electricity consumption per capita	-0.0132809	-0.0132986	-0.0146128	-0.0140649	-0.0140843	-0.0142308	-0.0153032	-0.0152495	-0.0119549	-0.0139652	-0.0135967	-0.015681	-0.014658	-0.0157168	-0.0147214	-0.0152606	-0.0153126	-0.0155828	-0.0139884	-0.0155584	-0.0156516	-0.0154318	-0.015513	-0.0153779	-0.0154236	-0.0153069	-0.0148773	-0.013197	-0.012049	-0.0151739	-0.0131399	-0.0129922	-0.0143321	-0.0136855	-0.0132968	-0.0140165	-0.0151982	-0.0151578	-0.0117088	-0.0135519	-0.0131706	-0.0155678	-0.0144006	-0.0156151	-0.0143968	-0.0151058	-0.0151764	-0.0154579	-0.0137063
Urban sewage treatment rate	-0.0110165	-0.00877908	-0.00797809	-0.00845106	-0.00746418	-0.00671846	-0.002477	-0.00434639	-0.0111477	-0.0122005	-0.00906142	-0.00770358	-0.00812422	-0.00413777	-0.00913452	-0.00642207	-0.00677624	-0.00533746	-0.0062567	-0.00653452	-0.0100869	-0.00407876	-0.00578003	-0.00228777	-0.00949079	-0.00347763	-0.00543731	-7.3102e-11	-0.00801083	-0.0109391	-0.00834432	-0.0116723	-0.00906517	-0.00983684	-0.00920377	-0.0076531	-0.00700044	-0.0031189	-0.00366354	-0.0118743	-0.013081	-0.00944804	-0.00869022	-0.00894118	-0.00413995	-0.010849	-0.00803969	-0.00812422	-0.00578619
Per capita sulfur dioxide emissions	-0.013588	-0.0106931	-0.0115043	-0.00592504	-0.00144748	-0.0100153	-0.0132092	-0.0133836	-0.00990074	-0.0122737	-0.0124524	-0.0142376	-0.0134393	-0.0131836	-0.0115433	-0.0125064	-0.0135403	-0.0131165	-0.0132151	-0.01147	-0.0156471	-0.00965385	-0.012832	-0.00811241	-0.0137225	-0.0108349	-0.0115307	-0.0112761	-0.00257713	-0.0105987	-0.0138513	-0.0110763	-0.0113748	-0.00628176	-7.30372e-11	-0.00975549	-0.0130091	-0.0133291	-0.0101006	-0.0125156	-0.0125206	-0.0141888	-0.0134089	-0.0130982	-0.0116713	-0.0125112	-0.0133724	-0.013073	-0.0133143
Harmless treatment rate of domestic waste	-0.0149642	-0.0125958	-0.00681602	-6.98472e-11	-0.00625717	-0.0075688	-0.00580074	-0.00430422	-0.00496938	-0.0129672	-0.0128891	-0.00120218	-0.0134357	-0.00736298	-0.00897859	-0.0089161	-0.00944906	-0.00571073	-0.007666	-0.00950383	-0.0107624	-0.00838927	-0.00777711	-0.00891093	-0.0128634	-0.00572638	-0.00111317	-0.0155705	-0.00762361	-0.00500251	-0.0144393	-0.0132928	-0.00695173	-0.00243489	-0.00725989	-0.00826903	-0.0012527	-0.00249052	-0.00892158	-0.0131021	-0.0134968	-0.00413666	-0.00895199	-0.00768246	-0.0109379	-0.00690545	-0.00479807	-0.00691079	-0.00855995
Green coverage rate of built-up area	-0.0109277	-0.0114031	-0.0104477	-0.00700781	-0.00124102	-0.0114706	-0.00789553	-0.00402312	-0.00515937	-0.0136531	-0.00961342	-0.00492007	-0.0111999	-0.00876329	-0.011807	-0.00854808	-0.0102405	-0.00911954	-0.00940243	-0.00670697	-0.00876329	-1.15841e-09	-0.00632715	-0.00483983	-0.00246966	-0.00700781	-0.00402312	-0.00191807	-0.000829959	-0.00818687	-0.0165354	-0.011807	-0.0108389	-0.00824488	-0.00417218	-0.0117601	-0.00807059	-0.00584214	-0.0120279	-0.0148857	-0.0108116	-0.00874898	-0.0115246	-0.0101436	-0.012108	-0.00889902	-0.0118808	-0.0102682	-0.012447
GDP index	-0.0142737	-0.0162741	-0.0153947	-0.014816	-0.0222754	-0.0146169	-0.0144642	-0.0141156	-0.0137543	-0.0161216	-0.0149454	-0.0141096	-0.0141372	-0.0149795	-0.0166452	-0.0159434	-0.0144642	-0.0141103	-0.0156526	-0.0152222	-0.0131397	-0.0140393	-0.0148235	-0.0141103	-0.0122346	-0.014816	-0.0142853	-0.0145138	-0.0136398	-0.0136113	-0.0149562	-0.0161352	-0.0153748	-0.0142521	-0.0189624	-0.0156523	-0.0164779	-0.0144642	-0.0143936	-0.0164095	-0.0157215	-0.0149562	-0.0163411	-0.0146052	-0.0163411	-0.0160664	-0.0152356	-0.0145347	-0.0162039
GDP per capita	-4.28603e-06	-3.32012e-06	-1.13014e-06	-8.78565e-07	-1.29824e-06	-1.58278e-06	-9.72893e-07	-1.09211e-06	-4.88042e-06	-2.17007e-06	-2.49582e-06	-4.4614e-07	-1.5468e-06	-5.34361e-07	-1.7011e-06	-7.50454e-07	-7.59927e-07	-6.4672e-07	-2.15705e-06	-4.59192e-07	-6.96996e-07	-7.09499e-07	-4.90659e-07	-2.92267e-10	-3.47904e-07	-5.86841e-07	-3.05473e-07	-6.03439e-07	-6.25516e-07	-9.46419e-07	-4.78157e-06	-3.8603e-06	-1.36631e-06	-1.05806e-06	-1.6965e-06	-1.8798e-06	-1.23212e-06	-1.28356e-06	-5.48782e-06	-2.61025e-06	-2.92349e-06	-6.04606e-07	-1.8464e-06	-6.88766e-07	-2.09015e-06	-9.69036e-07	-9.67161e-07	-8.17941e-07	-2.56066e-06
Public budget revenue per capita	-0.0150902	-0.00830279	-0.00113819	-0.00232739	-0.00253922	-0.00390113	-0.00117456	-0.00142672	-0.0195	-0.00440675	-0.0055834	-0.000330712	-0.00273532	-0.000501494	-0.00253125	-0.000446051	-0.000782034	-0.000654219	-0.00497868	-0.000584956	-0.00141423	-0.00172263	-0.000490911	-7.25127e-05	-0.000952594	-0.00109186	-3.2646e-10	-0.000646531	-0.00131172	-0.00165111	-0.0175329	-0.0100861	-0.00165969	-0.00428571	-0.0033911	-0.00483073	-0.00166284	-0.00204203	-0.0210102	-0.00563041	-0.00677207	-0.000944916	-0.00366238	-0.000958387	-0.00346627	-0.00102922	-0.00143825	-0.0011413	-0.0060453
Urbanization rate	-0.019286	-0.0176435	-0.00986947	-0.0108471	-0.0119494	-0.0143602	-0.0130775	-0.0131991	-0.0203228	-0.0125693	-0.0138074	-0.00937733	-0.0119708	-0.00971499	-0.0114759	-0.0082671	-0.0110852	-0.00971499	-0.0147654	-0.00895043	-0.0115191	-0.0115191	-0.0088087	-0.00738008	-0.00799939	-0.00976654	-0.00812066	-0.0102168	-0.0108843	-0.00974862	-0.0194214	-0.0177645	-0.0100368	-0.0110438	-0.0122571	-0.0144198	-0.0131718	-0.0132828	-0.0202493	-0.0129472	-0.0139068	-0.00973741	-0.0121206	-0.0100902	-0.0117132	-0.00868717	-0.0112158	-0.0100969	-0.0152369
The proportion of output value of secondary and tertiary industries in GDP	-0.0170739	-0.0163673	-0.0108393	-0.0148853	-0.0107414	-0.0127108	-0.00965163	-0.0120466	-0.0172932	-0.014108	-0.0147489	-0.00929938	-0.0118553	-0.00934987	-0.012899	-0.00934987	-0.0100011	-0.00848329	-0.0148399	-0.00701379	-8.02778e-11	-0.0107414	-0.00822494	-0.00899518	-0.00863752	-0.0122847	-0.010348	-0.0122372	-0.0122847	-0.00848329	-0.0171178	-0.0165003	-0.011374	-0.0151121	-0.0114706	-0.012899	-0.0104467	-0.0122847	-0.0172932	-0.0145208	-0.0150668	-0.00995138	-0.0123322	-0.00990155	-0.0133204	-0.0101005	-0.0107904	-0.00950101	-0.0150215
Parkland area per capita	-0.00872131	-0.00612367	-0.00127982	-0.00144845	-0.00215172	-0.00425883	-0.00303752	-0.00305008	-0.00798247	-0.00398856	-0.00298485	-0.000811157	-0.00151439	-0.000963389	-0.0033749	-0.00102986	-0.0025715	-0.000668514	-0.00514218	-0.000704867	-0.00210069	-0.00130208	-0.00105497	-1.05757e-10	-0.000381486	-0.000588182	-0.00104103	-0.000505162	-0.00248514	-0.0015059	-0.0122668	-0.00781588	-0.00925647	-0.00786168	-0.0109078	-0.0093228	-0.00866607	-0.00860995	-0.00865485	-0.0111315	-0.00827156	-0.00859871	-0.00885634	-0.00911241	-0.0143993	-0.0093228	-0.00977341	-0.00827156	-0.0107581
Consumption of chemical fertilizers	-0.0162053	-0.016043	-0.0103947	-0.0146346	-0.0142197	-0.0141575	-0.0137948	-0.0135385	-0.016213	-0.00959199	-0.0146627	-0.0107701	-0.0141147	-0.0139683	-0.00675216	-0.00555593	-0.0107667	-0.012345	-0.0124523	-0.0125211	-0.0157727	-0.0149613	-0.0121182	-0.0149934	-0.013704	-0.013611	-0.0150225	-0.0163558	-0.0159151	-0.0143967	-0.0162053	-0.0160185	-0.0103628	-0.014584	-0.0139858	-0.0141333	-0.013623	-0.0133121	-0.0162113	-0.00956602	-0.0146684	-0.0105878	-0.0141377	-0.0139048	-0.0062321	-0.00501251	-0.0106262	-0.0122456	-0.0122986
The proportion of science, technology and education in GDP	-0.00561486	-0.00328237	-0.00234204	-0.00632344	-0.00420902	-0.00295406	-0.00449147	-0.0038238	-0.00474313	-0.00068125	-0.00278062	-0.00504662	-0.00259624	-0.00499254	-0.000174539	-0.00282557	-0.00311429	-0.00347622	-0.00126418	-0.00722403	-0.00761546	-0.00391009	-0.00368949	-0.0164815	-0.0115174	-0.00761906	-0.0112768	-0.0122687	-0.010209	-0.00813961	-0.00622058	-0.00357368	-0.00196925	-0.00681539	-0.00399931	-0.00311461	-0.00493854	-0.00499667	-0.00476925	-0.000490449	-0.00271721	-0.00649201	-0.00309082	-0.00527609	-1.66645e-10	-0.00337439	-0.00362666	-0.00342648	-0.00139124
Number of students in higher education per 10,000 persons	-0.0261017	-0.0233424	-0.00654228	-0.00734549	-0.00492314	-0.0105361	-0.00998064	-0.00922791	-0.0181725	-0.0104433	-0.00843851	-0.00486969	-0.00675159	-0.0099735	-0.00784937	-0.00430361	-0.0123678	-0.00715506	-0.00475436	-0.00228925	-0.00363094	-0.00714437	-0.00468088	-1.50641e-10	-0.000306803	-0.0125324	-0.00405383	-0.000752331	-0.00331448	-0.00426543	-0.0261988	-0.0243938	-0.00769889	-0.00837378	-0.00580728	-0.0116269	-0.0108498	-0.0104164	-0.0187899	-0.0119966	-0.00949619	-0.00611549	-0.00813102	-0.0123876	-0.0094233	-0.00562754	-0.0135898	-0.00824636	-0.00609377
Number of patent applications granted	-0.00385284	-0.0013234	-0.00153461	-0.000564352	-0.000394344	-0.00250454	-0.00090902	-0.00126825	-0.00467365	-0.00498684	-0.006682	-0.000873905	-0.00212366	-0.000626521	-0.00406645	-0.00159751	-0.00164051	-0.00156321	-0.0117263	-0.000566571	-7.36106e-05	-0.00153693	-0.00192287	-0.000431269	-0.000635273	-0.000855016	-0.000252619	-8.65035e-10	-8.13783e-05	-0.000429433	-0.00422954	-0.0017545	-0.00174388	-0.000652731	-0.000455518	-0.00293091	-0.00103134	-0.00154892	-0.00593389	-0.0067711	-0.0101136	-0.00099684	-0.00258221	-0.000702594	-0.00572809	-0.00215861	-0.00197066	-0.00229243	-0.0134714
Openness to the outside world	-0.0248999	-0.041875	-0.0075078	-0.00841276	-0.00551389	-0.0197478	-0.00792285	-0.00745563	-0.0527595	-0.037882	-0.0286397	-0.00683235	-0.0271918	-0.00499122	-0.0167059	-0.0035625	-0.00614382	-0.00440219	-0.0523621	-0.00570802	-0.00907204	-0.0055745	-0.00428686	-0.00425303	-0.00579834	-0.00665165	-0.00618691	-0.00374694	-0.0076281	-0.011752	-0.0273609	-0.0424263	-0.00766508	-0.00773136	-0.00506345	-0.0187338	-0.00773963	-0.0085397	-0.0546934	-0.038848	-0.030353	-0.00759344	-0.0262769	-0.00606503	-0.0168935	-0.0035584	-0.00622492	-0.00423467	-0.0533675
FDI (Foreign Direct Investment)	-0.00698286	-0.0066464	-0.00411945	-0.000736431	-0.00313854	-0.00709125	-0.00264326	-0.00337625	-0.0122644	-0.0211289	-0.0135616	-0.00167846	-0.00538775	-0.00505583	-0.0182208	-0.00280107	-0.00462348	-0.0048939	-0.0237062	-0.00098316	-0.00171881	-0.0017126	-0.00254417	-0.00053932	-0.000778389	-0.00154757	-5.64757e-05	-0.0007141	-0.000398507	-0.000139818	-0.00868199	-0.00799326	-0.00430915	-0.00119844	-0.00422414	-0.0109478	-0.00362318	-0.00381131	-0.0126495	-0.0265393	-0.0152518	-0.00312573	-0.00646037	-0.00573993	-0.0171117	-0.00399316	-0.00510258	-0.00536208	-0.0270032
Public library collections per 10,000 persons	-0.014859	-0.0170039	-0.00184751	-0.00264753	-0.00525184	-0.0109998	-0.00849632	-0.00592628	-0.058716	-0.00808391	-0.00924748	-3.4527e-10	-0.00649368	-0.00487231	-0.0048604	-0.000567458	-0.00589615	-0.00395969	-0.00595905	-0.00546348	-0.00280801	-0.004259	-0.00341087	-0.00227757	-0.00515433	-0.0032595	-0.00576194	-0.0120149	-0.0128356	-0.0076298	-0.0155611	-0.0179286	-0.00200459	-0.00479256	-0.00539923	-0.0112121	-0.00870425	-0.0068732	-0.0578553	-0.00871169	-0.00987123	-0.000421821	-0.00705069	-0.00498597	-0.00509233	-0.000718075	-0.00618073	-0.00410126	-0.00676437
Number of doctors per 10,000 persons	-0.0226991	-0.0150518	-0.00671166	-0.0112428	-0.0123949	-0.0129558	-0.0120969	-0.00843305	-0.0157308	-0.00576353	-0.0093727	-0.00118512	-0.00344529	-0.00217857	-0.00649071	-0.00259056	-0.00699462	-0.00577779	-0.00380795	-0.00241226	-0.00545492	-0.00439893	-0.00498196	-0.00142797	-0.00345969	-0.00756427	-0.00468711	-0.00692821	-0.00915631	-0.0119449	-0.0230769	-0.0146335	-0.00667731	-0.0115446	-0.0123433	-0.0133305	-0.0129628	-0.0083548	-0.0160448	-0.0064595	-0.0103697	-0.00195805	-0.00393412	-0.00259867	-0.00704818	-0.00315144	-0.00716437	-0.00499031	-0.00519331
Public finance expenditure per capita	-0.00914548	-0.00538184	-0.000620043	-0.00171417	-0.00320931	-0.00320177	-0.00230348	-0.00183947	-0.0122654	-0.00215428	-0.00275066	-2.04582e-10	-0.00112074	-0.000357156	-0.000939328	-7.21551e-05	-0.000480134	-0.000516711	-0.00259043	-0.000366201	-0.00140528	-0.00124437	-0.000378779	-0.000549685	-0.00120648	-0.00914548	-0.00538184	-0.000620043	-0.00171417	-0.00320931	-0.0109039	-0.00658398	-0.00118551	-0.00296806	-0.00406739	-0.00397687	-0.00284255	-0.00266504	-0.0130659	-0.00289045	-0.00337013	-0.000845846	-0.00181376	-0.00097827	-0.00167068	-0.000834666	-0.0014288	-0.00112234	-0.00302081
[truncated: 431 more columns]

## Sheet: Sheet1
	entropy	redundancy rate	weight
Per capita cultivated land area	0.948969	0.0510314	0.183658	0.183658
Water resources per capita	0.913076	0.0869239	0.312833	0.312833
Proportion of nature reserve in the area under jurisdiction	0.952473	0.0475274	0.171048	0.171048
Forest coverage rate	0.963199	0.0368006	0.132443	0.132443
Electricity consumption per capita	0.994883	0.00511698	0.0184157	0.0184157
Urban sewage treatment rate	0.992039	0.0079614	0.0286525	0.0286525
Per capita sulfur dioxide emissions	0.992777	0.00722303	0.0259952	0.0259952
Harmless treatment rate of domestic waste	0.990701	0.00929884	0.0334659	0.0334659
Green coverage rate of built-up area	0.974023	0.0259769	0.0934889	0.0934889
		0.27786	1
GDP index	0.994698	0.00530191	0.0072201	0.0072201
GDP per capita	0.871459	0.128541	0.175046	0.175046
Public budget revenue per capita	0.933069	0.0669312	0.0911465	0.0911465
Urbanization rate	0.984703	0.0152972	0.0208317	0.0208317
The proportion of output value of secondary and tertiary industries in GDP	0.994402	0.00559784	0.00762311	0.00762311
Parkland area per capita	0.987127	0.0128731	0.0175305	0.0175305
Consumption of chemical fertilizers	0.992597	0.00740271	0.010081	0.010081
The proportion of science, technology and education in GDP	0.974484	0.025516	0.0347475	0.0347475
Number of students in higher education per 10,000 persons	0.980399	0.0196012	0.0266928	0.0266928
Number of patent applications granted	0.850237	0.149763	0.203946	0.203946
Openness to the outside world	0.919256	0.0807443	0.109957	0.109957
FDI (Foreign Direct Investment)	0.918971	0.0810292	0.110345	0.110345
Public library collections per 10,000 persons	0.938359	0.0616409	0.0839423	0.0839423
Number of doctors per 10,000 persons	0.972473	0.0275273	0.0374866	0.0374866
Public finance expenditure per capita	0.953441	0.0465587	0.0634034	0.0634034
		0.734325	1

## Sheet: comprehensive index
weight	region	Beijing	Tianjin	Hebei	Shanxi	Inner Mongolia	Liaoning	Jilin	Heilongjiang	Shanghai	Jiangsu	Zhejiang	Anhui	Fujian	Jiangxi	Shandong	Henan	Hubei	Hunan	Guangdong	Guangxi	Hainan	Chongqing	Sichuan	Guizhou	Yunnan	Shaanxi	Gansu	Qinghai	Ningxia	Xinjiang	Beijing	Tianjin	Hebei	Shanxi	Inner Mongolia	Liaoning	Jilin	Heilongjiang	Shanghai	Jiangsu	Zhejiang	Anhui	Fujian	Jiangxi	Shandong	Henan	Hubei	Hunan
	year	2005	2005	2005	2005	2005	2005	2005	2005	2005	2005	2005	2005	2005	2005	2005	2005	2005	2005	2005	2005	2005	2005	2005	2005	2005	2005	2005	2005	2005	2005	2006	2006	2006	2006	2006	2006	2006	2006	2006	2006	2006	2006	2006	2006	2006	2006	2006	2006
0.183658	Per capita cultivated land area	0.033626	0.0786032	0.178814	0.246281	0.630935	0.175903	0.37383	0.564914	0.0250051	0.117928	0.0727169	0.173433	0.067502	0.121128	0.14661	0.152777	0.153182	0.108213	0.0582177	0.167882	0.163144	0.129419	0.199601	0.236415	0.26029	0.248914	0.352109	0.227572	0.387762	0.360639	0.0324956	0.0760271	0.177541	0.244775	0.628003	0.173751	0.372848	0.564464	0.0243335	0.116678	0.0713889	0.17373	0.0670144	0.120295	0.145597	0.152572	0.153663	0.10792
0.312833	Water resources per capita	0.00582257	0.00294987	0.00850746	0.0117035	0.109372	0.049509	0.118138	0.111536	0.00504909	0.0336959	0.118748	0.0660725	0.230049	0.202943	0.0234025	0.0319733	0.0931488	0.152303	0.108733	0.214119	0.215209	0.104101	0.20625	0.128551	0.240966	0.0745098	0.0580751	0.945443	0.00537672	0.278913	0.00525344	0.00255636	0.00610947	0.0123831	0.0977925	0.0330451	0.0731963	0.108639	0.00598048	0.0285187	0.104224	0.0526165	0.265357	0.217924	0.00955117	0.0170561	0.0627422	0.160828
0.171048	Proportion of nature reserve in the area under jurisdiction	0.0857308	0.170143	0.019784	0.0764983	0.138488	0.127937	0.143764	0.117385	0.175418	0.0844119	0.0145083	0.021103	0.0237408	0.0514385	0.0672657	0.0395681	0.0527574	0.0461628	0.040887	0.06199	0.0501196	0.122661	0.2229	0.0461628	0.121342	0.0435249	0.24796	0.362707	0.109472	0.159591	0.0838843	0.171462	0.02229	0.0754431	0.130575	0.124112	0.142973	0.137565	0.175287	0.0692441	0.0143764	0.0242684	0.0205754	0.0531531	0.0676614	0.0398319	0.052098	0.0490644
0.132443	Forest coverage rate	0.286878	0.0814281	0.230974	0.162073	0.231131	0.470247	0.551049	0.573129	0.00360163	0.0720326	0.805982	0.330254	0.939868	0.828688	0.164422	0.207485	0.37316	0.590197	0.681961	0.602412	0.71923	0.30238	0.427967	0.327122	0.59239	0.463671	0.0582524	0.0228625	0.0491701	1e-09	0.286878	0.0814281	0.230974	0.162073	0.231131	0.470247	0.551049	0.573129	0.00360163	0.0720326	0.805982	0.330254	0.939868	0.828688	0.164422	0.207485	0.37316	0.590197
0.0184157	Electricity consumption per capita	0.817214	0.818512	0.916255	0.875239	0.876685	0.887616	0.968451	0.964371	0.720884	0.867816	0.84049	0.997259	0.919648	1	0.924428	0.965217	0.969167	0.989761	0.869541	0.987893	0.995015	0.978242	0.984428	0.974133	0.977612	0.968735	0.936182	0.81105	0.727644	0.958635	0.806859	0.796044	0.895191	0.847059	0.818382	0.871636	0.96048	0.957412	0.703267	0.837186	0.809109	0.988609	0.900325	0.992227	0.900038	0.953469	0.958826	0.980227
0.0286525	Urban sewage treatment rate	0.630974	0.482459	0.431121	0.461313	0.398729	0.352524	0.111478	0.212566	0.639897	0.712382	0.500795	0.413764	0.440411	0.200831	0.505562	0.334433	0.356069	0.269649	0.32441	0.341279	0.56839	0.197531	0.295807	0.101821	0.528908	0.164405	0.275516	1e-09	0.433199	0.625718	0.454468	0.675834	0.501039	0.551766	0.510084	0.410586	0.369881	0.145092	0.174551	0.689769	0.774111	0.526097	0.476714	0.492972	0.200953	0.619606	0.435032	0.440411
0.0259952	Per capita sulfur dioxide emissions	0.810841	0.609624	0.664898	0.304743	0.0606339	0.56414	0.783898	0.796279	0.556518	0.718136	0.730617	0.857449	0.800247	0.782082	0.667576	0.73439	0.807439	0.777336	0.784318	0.662545	0.960311	0.540155	0.757248	0.440064	0.82045	0.61922	0.666712	0.64926	0.116744	0.603251	0.82967	0.635621	0.656017	0.326226	1e-09	0.546881	0.769739	0.792408	0.569831	0.735036	0.735383	0.853934	0.79808	0.776036	0.676386	0.734731	0.795488	0.774255
0.0334659	Harmless treatment rate of domestic waste	0.953411	0.775832	0.375886	1e-09	0.34016	0.424927	0.311435	0.22037	0.260227	0.8032	0.797431	0.0515103	0.83798	0.411417	0.51941	0.515152	0.551662	0.30582	0.431333	0.555439	0.643488	0.47951	0.438676	0.5148	0.795531	0.306795	0.0472372	1	0.428537	0.262239	0.913441	0.827343	0.384651	0.114616	0.404679	0.47144	0.0539555	0.117608	0.515525	0.813185	0.842537	0.210498	0.517597	0.432419	0.655952	0.381658	0.249863	0.382004
0.0934889	Green coverage rate of built-up area	0.0351746	0.0369984	0.0333507	0.0208442	0.00286608	0.037259	0.0239708	0.0109432	0.0145909	0.0458572	0.0302241	0.0138093	0.0362168	0.0270974	0.0385618	0.0263158	0.032569	0.0284002	0.0294424	0.019802	0.0270974	1e-09	0.0184992	0.0135487	0.00625326	0.0208442	0.0109432	0.00468994	0.00182387	0.025013	0.0577124	0.0385618	0.0348359	0.0252215	0.0114122	0.0383794	0.0245961	0.0168577	0.0394216	0.0508598	0.0347316	0.0270453	0.0374674	0.0322043	0.0397342	0.0275925	0.0388484	0.0326733
comprehensive index		0.150058	0.129413	0.131684	0.12265	0.245189	0.190774	0.257257	0.287576	0.0928037	0.142406	0.238063	0.155396	0.294691	0.265088	0.13738	0.138457	0.186266	0.212633	0.204906	0.253838	0.284758	0.171127	0.258687	0.185647	0.304093	0.188742	0.178034	0.468348	0.141494	0.243164	0.145367	0.136715	0.132946	0.129281	0.243173	0.187156	0.241213	0.284991	0.0905026	0.137992	0.242562	0.161309	0.295128	0.279165	0.12866	0.137413	0.168978	0.223328
0.0072201	GDP index	0.583769	0.683378	0.639201	0.610458	1	0.60063	0.593115	0.576032	0.55843	0.675674	0.616862	0.575738	0.577087	0.618553	0.702198	0.666693	0.593115	0.575773	0.652095	0.630606	0.528733	0.572304	0.610828	0.575773	0.485591	0.610458	0.584335	0.595552	0.552872	0.551493	0.617395	0.676359	0.638206	0.58271	0.822037	0.65208	0.693702	0.593115	0.589647	0.690233	0.655548	0.617395	0.686765	0.600052	0.686765	0.672891	0.631269	0.596584
0.175046	GDP per capita	2.44974e-05	1.86386e-05	5.90214e-06	4.51498e-06	6.84129e-06	8.44989e-06	5.0323e-06	5.69096e-06	2.81546e-05	1.1832e-05	1.3738e-05	2.19835e-06	8.24529e-06	2.66222e-06	9.12504e-06	3.81845e-06	3.8697e-06	3.2602e-06	1.17563e-05	2.26663e-06	3.53008e-06	3.59739e-06	2.43176e-06	1e-09	1.68883e-06	2.94059e-06	1.47143e-06	3.02897e-06	3.14679e-06	4.88675e-06	2.75439e-05	2.19013e-05	7.22409e-06	5.50232e-06	9.09869e-06	1.01509e-05	6.47085e-06	6.75892e-06	3.19274e-05	1.4412e-05	1.62678e-05	3.0352e-06	9.95866e-06	3.4858e-06	1.13675e-05	5.01108e-06	5.00077e-06	4.18446e-06
0.0911465	Public budget revenue per capita	0.193656	0.0952544	0.00973922	0.021891	0.0241777	0.0395614	0.0100902	0.0125649	0.2639	0.0455347	0.0599043	0.00245287	0.0263224	0.00389332	0.0240911	0.00341787	0.00639167	0.00523584	0.0524411	0.00462137	0.0124407	0.0155513	0.00380203	0.000463232	0.00797335	0.00929434	1e-09	0.0051672	0.0114277	0.0148219	0.232011	0.119822	0.0149092	0.0440931	0.0336723	0.0506399	0.0149412	0.0188629	0.288958	0.060491	0.0750156	0.00790126	0.0367869	0.0080278	0.0345312	0.00869707	0.0126797	0.0097692
0.0208317	Urbanization rate	0.933006	0.837669	0.418453	0.46797	0.524994	0.653828	0.584594	0.591091	0.994286	0.557594	0.623804	0.393919	0.526114	0.410723	0.500347	0.339584	0.480182	0.410723	0.67601	0.372857	0.502588	0.502588	0.365911	0.297237	0.326701	0.4133	0.332526	0.43593	0.469875	0.412404	0.94096	0.844615	0.426856	0.478053	0.541126	0.657077	0.589635	0.595572	0.989917	0.577648	0.629181	0.411844	0.533956	0.429544	0.51267	0.359974	0.486904	0.42988
0.00762311	The proportion of output value of secondary and tertiary industries in GDP	0.966967	0.918919	0.561562	0.81982	0.555556	0.678679	0.489489	0.636637	0.981982	0.768769	0.810811	0.468468	0.624625	0.471471	0.690691	0.471471	0.510511	0.42042	0.816817	0.336336	1e-09	0.555556	0.405405	0.45045	0.429429	0.651652	0.531532	0.648649	0.651652	0.42042	0.96997	0.927928	0.594595	0.834835	0.600601	0.690691	0.537538	0.651652	0.981982	0.795796	0.831832	0.507508	0.654655	0.504505	0.717718	0.516517	0.558559	0.48048
0.0175305	Parkland area per capita	0.326134	0.215539	0.0359155	0.0413007	0.0646895	0.141448	0.0958951	0.0963495	0.293894	0.131144	0.0939926	0.0215165	0.0434319	0.0260925	0.10821	0.0281231	0.0792614	0.017332	0.175924	0.0183882	0.0629473	0.036621	0.0288949	1e-09	0.00928485	0.0150251	0.0284661	0.012683	0.07623	0.0431569	0.488461	0.286707	0.349848	0.28868	0.424827	0.352808	0.323704	0.321237	0.32321	0.435186	0.306439	0.320744	0.332089	0.343435	0.591558	0.352808	0.373032	0.306439
0.010081	Consumption of chemical fertilizers	0.986856	0.974965	0.580791	0.873065	0.843484	0.839066	0.813397	0.795356	0.987419	0.528131	0.875077	0.605728	0.836026	0.825654	0.349662	0.278586	0.605502	0.712402	0.719786	0.724529	0.955235	0.896496	0.696841	0.898805	0.806994	0.80045	0.900901	0.997903	0.965621	0.856079	0.986856	0.973178	0.57868	0.869448	0.826893	0.837349	0.801295	0.779482	0.987292	0.526442	0.875486	0.593597	0.837658	0.821165	0.318435	0.247214	0.596144	0.705573
0.0347475	The proportion of science, technology and education in GDP	0.121421	0.0653165	0.0443986	0.139443	0.0869593	0.0578833	0.0937346	0.0778493	0.0998367	0.0110311	0.0540108	0.107274	0.0499376	0.105943	0.00244063	0.0550108	0.0614947	0.0697659	0.0220739	0.162918	0.173309	0.0798765	0.07471	0.433614	0.282404	0.173405	0.27541	0.304458	0.244771	0.187393	0.136802	0.0720189	0.0364499	0.15219	0.0819808	0.0615018	0.104616	0.106044	0.100473	0.00764823	0.0526048	0.14379	0.0609637	0.112953	1e-09	0.0674232	0.0732481	0.0686201
0.0266928	Number of students in higher education per 10,000 persons	0.843094	0.735	0.16116	0.18453	0.115782	0.282226	0.2647	0.241285	0.54193	0.279283	0.217161	0.114327	0.167198	0.264476	0.199458	0.099101	0.341434	0.178941	0.111198	0.0480513	0.081471	0.178629	0.109211	1e-09	0.0050493	0.346857	0.0924934	0.0136904	0.0733658	0.0980863	0.846956	0.775787	0.194979	0.215203	0.14026	0.317231	0.292215	0.278431	0.564306	0.329265	0.249585	0.148965	0.207889	0.342083	0.247325	0.135223	0.382078	0.211359
0.203946	Number of patent applications granted	0.0141211	0.00417955	0.00494049	0.00160784	0.00107941	0.00861838	0.0027394	0.00398368	0.0176482	0.019025	0.0267415	0.00262103	0.00714159	0.00180654	0.0150272	0.00517018	0.00532801	0.00504477	0.051878	0.00161489	0.000170509	0.00494895	0.00637924	0.00119214	0.00183472	0.00255761	0.000659485	1e-09	0.000190237	0.00118651	0.0157247	0.00574935	0.00570989	0.00189108	0.00126683	0.010315	0.0031565	0.00499263	0.0232834	0.0271586	0.0435273	0.00303814	0.00892417	0.00205314	0.0223464	0.00727546	0.00655961	0.00779121
0.109957	Openness to the outside world	0.36977	0.707169	0.0879891	0.100568	0.0613749	0.278583	0.0937221	0.087273	0.950439	0.623038	0.439417	0.0787963	0.412121	0.0546757	0.22753	0.0370457	0.0696086	0.0472802	0.941206	0.0638942	0.109912	0.0621596	0.0458523	0.0454348	0.0650718	0.0763668	0.0701781	0.0392608	0.0896444	0.149328	0.415288	0.719004	0.0901542	0.0910693	0.055594	0.261325	0.0911836	0.102356	0.995742	0.643134	0.472244	0.089167	0.395089	0.0685696	0.230616	0.0369968	0.0706808	0.0452084
0.110345	FDI (Foreign Direct Investment)	0.0985012	0.0929767	0.0533658	0.00757095	0.0390325	0.100292	0.032067	0.0424435	0.191456	0.368589	0.215864	0.0191299	0.0728089	0.0676301	0.307927	0.0342648	0.0609784	0.0651261	0.424251	0.0104656	0.0196517	0.0195712	0.0306977	0.00534805	0.00805508	0.0174501	0.00044693	0.00731476	0.00382071	0.00120347	0.127183	0.115405	0.0562124	0.0130759	0.054934	0.167279	0.0460304	0.0487916	0.198644	0.487397	0.248493	0.0388498	0.0899455	0.0783695	0.285419	0.0514836	0.0683558	0.0724062
0.0839423	Public library collections per 10,000 persons	0.179325	0.210913	0.0158815	0.0239217	0.0526303	0.125262	0.0923238	0.0605661	0.990846	0.0870782	0.102014	1e-09	0.0673782	0.0482463	0.0481097	0.00421436	0.0602077	0.0379655	0.0609562	0.055101	0.0255865	0.0412948	0.0319767	0.0201473	0.0514981	0.0303528	0.0586158	0.139115	0.150513	0.0813655	0.18955	0.224847	0.0174235	0.0473329	0.054349	0.128137	0.0949888	0.0720005	0.971964	0.0950845	0.110188	0.00303025	0.0741798	0.0495528	0.0507803	0.0054806	0.063606	0.0395349
0.0374866	Number of doctors per 10,000 persons	0.471837	0.286865	0.110301	0.202487	0.227403	0.239729	0.220906	0.144148	0.302483	0.0923565	0.163255	0.0151444	0.0509515	0.0301686	0.106072	0.0367548	0.115756	0.0926225	0.0571678	0.0338821	0.0866326	0.0675189	0.0779788	0.0186879	0.0511962	0.126871	0.0726595	0.114472	0.158817	0.217605	0.481461	0.277324	0.109641	0.20896	0.226276	0.248031	0.239884	0.142576	0.309764	0.105477	0.183977	0.0267213	0.0593554	0.0368863	0.116794	0.0459955	0.11905	0.0781304
0.0634034	Public finance expenditure per capita	0.173632	0.0933721	0.00802224	0.0251569	0.0514185	0.05128	0.0351939	0.0272519	0.245867	0.0326102	0.0430938	1e-09	0.01557	0.00434494	0.0127679	0.000749496	0.00603404	0.00654753	0.0402373	0.00446703	0.020093	0.0175171	0.00463743	0.00701438	0.0169172	0.173632	0.0933721	0.00802224	0.0251569	0.0514185	0.213777	0.11808	0.0165865	0.0470131	0.0675272	0.0657975	0.0447444	0.041564	0.265122	0.0456084	0.0543868	0.011352	0.0268202	0.0133635	0.0244351	0.011184	0.0204731	0.015595
comprehensive index		0.189224	0.196819	0.0533787	0.0651133	0.0678243	0.11343	0.0739808	0.0686322	0.328664	0.167867	0.142241	0.0412981	0.101036	0.0557925	0.104672	0.0343401	0.0627495	0.0515702	0.214572	0.0445642	0.0553099	0.05459	0.0441442	0.0466186	0.0482908	0.0716062	0.0582825	0.0616257	0.0718245	0.0706877	0.208897	0.208247	0.0617353	0.0760375	0.0769917	0.127032	0.0834922	0.0796643	0.339048	0.195456	0.161527	0.0548929	0.111701	0.0682093	0.116041	0.0458438	0.0731609	0.0601134
[truncated: 432 more columns]

## Sheet: 2
weight	Beijing	Tianjin	Hebei	Shanxi	Inner Mongolia	Liaoning	Jilin	Heilongjiang	Shanghai	Jiangsu	Zhejiang	Anhui	Fujian	Jiangxi	Shandong	Henan	Hubei	Hunan	Guangdong	Guangxi	Hainan	Chongqing	Sichuan	Guizhou	Yunnan	Shaanxi	Gansu	Qinghai	Ningxia	Xinjiang	Beijing	Tianjin	Hebei	Shanxi	Inner Mongolia	Liaoning	Jilin	Heilongjiang	Shanghai	Jiangsu	Zhejiang	Anhui	Fujian	Jiangxi	Shandong	Henan	Hubei	Hunan	Guangdong
year	2005	2005	2005	2005	2005	2005	2005	2005	2005	2005	2005	2005	2005	2005	2005	2005	2005	2005	2005	2005	2005	2005	2005	2005	2005	2005	2005	2005	2005	2005	2006	2006	2006	2006	2006	2006	2006	2006	2006	2006	2006	2006	2006	2006	2006	2006	2006	2006	2006
RECC	0.150058	0.129413	0.131684	0.12265	0.245189	0.190774	0.257257	0.287576	0.0928037	0.142406	0.238063	0.155396	0.294691	0.265088	0.13738	0.138457	0.186266	0.212633	0.204906	0.253838	0.284758	0.171127	0.258687	0.185647	0.304093	0.188742	0.178034	0.468348	0.141494	0.243164	0.145367	0.136715	0.132946	0.129281	0.243173	0.187156	0.241213	0.284991	0.0905026	0.137992	0.242562	0.161309	0.295128	0.279165	0.12866	0.137413	0.168978	0.223328	0.215907
HQD	0.189224	0.196819	0.0533787	0.0651133	0.0678243	0.11343	0.0739808	0.0686322	0.328664	0.167867	0.142241	0.0412981	0.101036	0.0557925	0.104672	0.0343401	0.0627495	0.0515702	0.214572	0.0445642	0.0553099	0.05459	0.0441442	0.0466186	0.0482908	0.0716062	0.0582825	0.0616257	0.0718245	0.0706877	0.208897	0.208247	0.0617353	0.0760375	0.0769917	0.127032	0.0834922	0.0796643	0.339048	0.195456	0.161527	0.0548929	0.111701	0.0682093	0.116041	0.0458438	0.0731609	0.0601134	0.236667
	0.337014	0.319192	0.16768	0.17873	0.257913	0.294207	0.275914	0.280977	0.349292	0.309227	0.368034	0.16022	0.345104	0.243227	0.239832	0.137908	0.216223	0.209433	0.419367	0.212717	0.250998	0.193306	0.213725	0.18606	0.242362	0.232509	0.203728	0.339778	0.201621	0.262211	0.348521	0.337465	0.18119	0.198295	0.273659	0.308382	0.283827	0.301354	0.350341	0.328459	0.395881	0.188199	0.363131	0.275983	0.244376	0.158739	0.222374	0.231733	0.452097
	0.339282	0.326232	0.185063	0.187763	0.313013	0.304204	0.331238	0.356208	0.421468	0.310273	0.380304	0.196695	0.395726	0.32088	0.242052	0.172797	0.249015	0.264203	0.419478	0.298402	0.340068	0.225717	0.302832	0.232265	0.352384	0.260348	0.236316	0.529973	0.213318	0.313851	0.354264	0.344963	0.194681	0.205319	0.320165	0.314188	0.324705	0.364655	0.429551	0.333447	0.404089	0.216202	0.406829	0.347374	0.244701	0.183257	0.242139	0.283442	0.452573
coupling degree C	0.993314	0.978422	0.906069	0.951893	0.823968	0.967139	0.832977	0.788799	0.828751	0.996628	0.967737	0.81456	0.872078	0.758001	0.990828	0.798089	0.868312	0.792696	0.999734	0.712852	0.73808	0.856409	0.705754	0.801067	0.68778	0.893069	0.862098	0.641122	0.945163	0.835463	0.983789	0.978264	0.930701	0.965791	0.854744	0.98152	0.874106	0.826409	0.815599	0.985039	0.979687	0.870478	0.892589	0.794483	0.998669	0.866211	0.918375	0.817568	0.998947
T	0.169641	0.163116	0.0925316	0.0938814	0.156507	0.152102	0.165619	0.178104	0.210734	0.155137	0.190152	0.0983473	0.197863	0.16044	0.121026	0.0863987	0.124508	0.132101	0.209739	0.149201	0.170034	0.112859	0.151416	0.116133	0.176192	0.130174	0.118158	0.264987	0.106659	0.156926	0.177132	0.172481	0.0973406	0.102659	0.160082	0.157094	0.162353	0.182328	0.214775	0.166724	0.202045	0.108101	0.203415	0.173687	0.122351	0.0916286	0.121069	0.141721	0.226287
D	0.410496	0.399495	0.289551	0.29894	0.359105	0.383541	0.371425	0.374818	0.417907	0.393209	0.428972	0.283037	0.415394	0.348732	0.346289	0.262591	0.328803	0.323599	0.457912	0.326126	0.354258	0.310891	0.326898	0.305008	0.348111	0.340961	0.319161	0.412176	0.317506	0.362085	0.417445	0.41077	0.30099	0.314877	0.369905	0.392671	0.376714	0.388171	0.418534	0.405252	0.444905	0.306756	0.426105	0.371472	0.349554	0.281726	0.333447	0.340391	0.475446
[truncated: 431 more columns]
